# Supplementary material for: A two-step MM and QM/MM approach to model AIEE of aryloxy benzothiadiazole derivatives for optoelectronic applications
Source: Royal Society of Chemistry journal article supplement (doi:10.1039/d1cp05225j), 2022-01-01
Supplement: d1cp05225j1.pdf [file d1cp05225j1.pdf]

## SUPPORTING INFORMATION DOCUMENT

### **A Two-Step MM and QM/MM approach to model AIEE of Aryloxy Benzothiadiazole derivatives for Optoelectronic Applications**

David Samuvel Michael<sup>a</sup>, S. K. Sridhar<sup>b</sup>, Rajadurai Vijay Solomon<sup>a\*</sup>

<sup>a</sup>Department of Chemistry, Madras Christian College (Autonomous) [Affiliated to the University of Madras], East Tambaram, Chennai – 600 059, Tamil Nadu, India.

<sup>b</sup>Department of Chemistry, Government Arts College (Autonomous) [Affiliated to the University of Madras], Nandanam, Chennai – 600 035, Tamil Nadu, India.

*\*Corresponding Author: [vijaysolomon\\_2005@yahoo.co.in](mailto:vijaysolomon_2005@yahoo.co.in)*

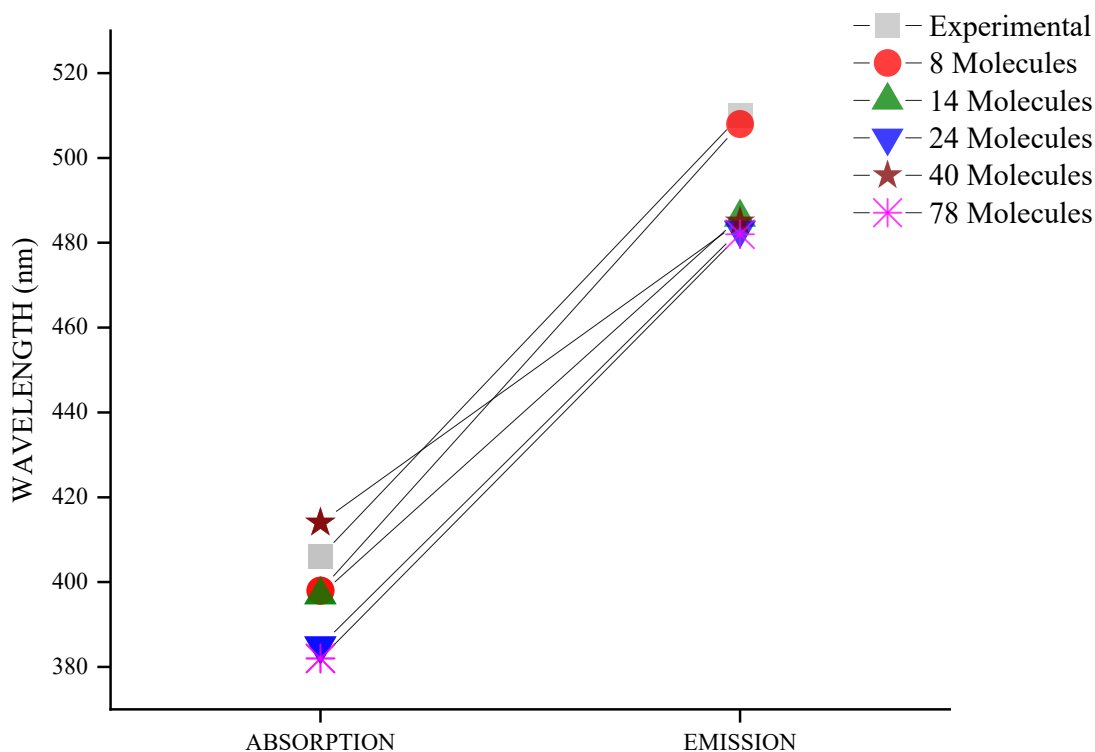

Figure 1: Comparison of cluster size with absorption and emission spectra for HB. 8 molecule clusters yields values closer to experimentally reported values.

Table 1: Selected bond parameters of derivatives in the individual molecules and in cluster (ONIOM)

| Molecule | Structure | O2-C12 | O2-C18 | C9-C15 | C7-C8 | C8-C12 | C7-C9 | C12-C13 | C9-C10 | C10-C13 | C12-O2-C18 | C12-O2-C18-C21 ( $\phi_1$ ) | C7-C9-C15-C16 ( $\phi_2$ ) | C13-C12-O2-C18 ( $\phi_3$ ) |
|----------|-----------|--------|--------|--------|-------|--------|-------|---------|--------|---------|------------|-----------------------------|----------------------------|-----------------------------|
| HB       | CRYSTAL   | 1.364  | 1.399  | 1.482  | 1.434 | 1.426  | 1.429 | 1.362   | 1.373  | 1.424   | 119.67     | 120.26                      | 39.65                      | 1.82                        |
|          | MONOMER   | 1.364  | 1.395  | 1.482  | 1.456 | 1.433  | 1.441 | 1.374   | 1.382  | 1.427   | 119.14     | 98.78                       | 38.79                      | 3.44                        |
|          | CLUSTER   | 1.361  | 1.389  | 1.481  | 1.454 | 1.434  | 1.440 | 1.373   | 1.380  | 1.426   | 122.77     | 132.58                      | 33.22                      | 6.02                        |
| FB       | MONOMER   | 1.359  | 1.397  | 1.483  | 1.457 | 1.431  | 1.441 | 1.374   | 1.377  | 1.428   | 120.61     | 148.76                      | 43.36                      | 54.26                       |
|          | CLUSTER   | 1.354  | 1.399  | 1.480  | 1.456 | 1.435  | 1.442 | 1.372   | 1.375  | 1.429   | 122.44     | 115.90                      | 35.14                      | 10.11                       |
| CB       | MONOMER   | 1.350  | 1.404  | 1.482  | 1.447 | 1.433  | 1.438 | 1.388   | 1.390  | 1.459   | 121.98     | 137.98                      | 51.24                      | 45.13                       |
|          | CLUSTER   | 1.343  | 1.401  | 1.489  | 1.450 | 1.433  | 1.456 | 1.384   | 1.399  | 1.468   | 125.32     | 116.03                      | 8.64                       | 14.45                       |
| NB       | MONOMER   | 1.347  | 1.403  | 1.484  | 1.447 | 1.435  | 1.439 | 1.382   | 1.377  | 1.435   | 122.62     | 144.38                      | 55.86                      | 46.61                       |
|          | CLUSTER   | 1.339  | 1.398  | 1.487  | 1.450 | 1.432  | 1.456 | 1.381   | 1.385  | 1.438   | 124.19     | 137.99                      | 16.25                      | 5.39                        |
| CAB      | MONOMER   | 1.374  | 1.410  | 1.489  | 1.446 | 1.430  | 1.440 | 1.381   | 1.384  | 1.450   | 119.83     | 142.14                      | 58.21                      | 125.35                      |
|          | CLUSTER   | 1.356  | 1.394  | 1.499  | 1.454 | 1.438  | 1.454 | 1.385   | 1.388  | 1.460   | 126.29     | 135.60                      | 13.07                      | 5.18                        |

Table 2: Occupancy numbers for selected bonds

| Molecule | O2-C12 | O2-C18 | C9-C15 | C7-C8  | C7-C9  | C8-C12 | C9-C10 | C10-C13 | C12-C13 |
|----------|--------|--------|--------|--------|--------|--------|--------|---------|---------|
| HB       | 0.0182 | 0.0163 | 0.0144 | 0.0259 | 0.0187 | 0.0198 | 0.1515 | 0.0067  | 0.1703  |
| FB       | 0.0118 | 0.0176 | 0.0142 | 0.0263 | 0.0181 | 0.0203 | 0.1798 | 0.0207  | 0.1912  |
| CB       | 0.0125 | 0.0184 | 0.0145 | 0.0259 | 0.0190 | 0.0208 | 0.1694 | 0.0164  | 0.1935  |
| NB       | 0.0122 | 0.0187 | 0.0148 | 0.0259 | 0.0199 | 0.0209 | 0.1599 | 0.0129  | 0.1900  |
| CAB      | 0.0153 | 0.0197 | 0.0150 | 0.0264 | 0.0185 | 0.0228 | 0.1399 | 0.0121  | 0.1702  |

Table 3 Percentage of p character in bonds connecting ArO, Btz, Ar and EWG groups

| Molecule | C12-C13 | C9-C10 | C10-C13 | O2-C12 | O2-C18 | C9-C15 |
|----------|---------|--------|---------|--------|--------|--------|
| HB       | 99.9    | 99.9   | 65      | 68     | 68     | 66     |
| FB       | 99.9    | 99.9   | 64      | 68     | 68     | 65     |
| CB       | 99.9    | 99.9   | 66      | 67     | 68     | 65     |
| NB       | 99.9    | 99.9   | 63      | 67     | 68     | 65     |
| CAB      | 99.9    | 99.9   | 66      | 68     | 68     | 66     |

SIT 4: List of NBO interactions

| Type                                      | Donor NBO (i) |      |         | Acceptor NBO (j) |      |         | E(2)<br>kcal/mol |
|-------------------------------------------|---------------|------|---------|------------------|------|---------|------------------|
|                                           | NBO           | Type | Bond    | NBO              | Type | Bond    |                  |
| HB                                        |               |      |         |                  |      |         |                  |
| <b><math>\pi</math>-<math>\pi</math>*</b> |               |      |         |                  |      |         |                  |
|                                           | 8             | BD   | N4-C7   | 585              | BD*  | N6-C8   | 13.73            |
|                                           | 12            | BD   | N6-C8   | 581              | BD*  | N4-C7   | 13.88            |
|                                           | 12            | BD   | N6-C8   | 595              | BD*  | C12-C13 | 10.58            |
|                                           | 17            | BD   | C9-C10  | 581              | BD*  | N4-C7   | 25.97            |
|                                           | 17            | BD   | C9-C10  | 595              | BD*  | C12-C13 | 15.2             |
|                                           | 22            | BD   | C12-C13 | 585              | BD*  | N6-C8   | 21.97            |
|                                           | 22            | BD   | C12-C13 | 590              | BD*  | C9-C10  | 17.16            |
|                                           | 25            | BD   | C15-C16 | 590              | BD*  | C9-C10  | 10.33            |
|                                           | 25            | BD   | C15-C16 | 607              | BD*  | C19-C26 | 19.31            |
|                                           | 25            | BD   | C15-C16 | 617              | BD*  | C27-C28 | 15.64            |
|                                           | 30            | BD   | C18-C21 | 611              | BD*  | C23-C24 | 16.37            |
|                                           | 30            | BD   | C18-C21 | 621              | BD*  | C29-C31 | 20.32            |
|                                           | 34            | BD   | C19-C26 | 598              | BD*  | C15-C16 | 19.75            |
|                                           | 34            | BD   | C19-C26 | 617              | BD*  | C27-C28 | 14.12            |
|                                           | 38            | BD   | C23-C24 | 603              | BD*  | C18-C21 | 21.46            |
|                                           | 38            | BD   | C23-C24 | 621              | BD*  | C29-C31 | 17.01            |

|                                                  |     |    |         |     |     |         |       |
|--------------------------------------------------|-----|----|---------|-----|-----|---------|-------|
|                                                  | 44  | BD | C27-C28 | 598 | BD* | C15-C16 | 19.55 |
|                                                  | 44  | BD | C27-C28 | 607 | BD* | C19-C26 | 21.16 |
|                                                  | 48  | BD | C29-C31 | 603 | BD* | C18-C21 | 18.75 |
|                                                  | 48  | BD | C29-C31 | 611 | BD* | C23-C24 | 20.27 |
| <b><math>\sigma</math>-<math>\sigma^*</math></b> |     |    |         |     |     |         |       |
|                                                  | 61  | BD | C45-H48 | 633 | BD* | C45-H47 | 11.52 |
| <b>n-<math>\pi^*</math></b>                      |     |    |         |     |     |         |       |
|                                                  | 95  | LP | S1      | 581 | BD* | N4-C7   | 19.46 |
|                                                  | 95  | LP | S1      | 585 | BD* | N6-C8   | 20.43 |
|                                                  | 97  | LP | O2      | 595 | BD* | C12-C13 | 31.2  |
|                                                  | 102 | LP | O5      | 611 | BD* | C23-C24 | 29.69 |
| FB                                               |     |    |         |     |     |         |       |
| <b><math>\pi</math>-<math>\pi^*</math></b>       |     |    |         |     |     |         |       |
|                                                  | 8   | BD | N4-C7   | 613 | BD* | N6-C8   | 13.78 |
|                                                  | 12  | BD | N6-C8   | 609 | BD* | N4-C7   | 13.83 |
|                                                  | 12  | BD | N6-C8   | 623 | BD* | C11-C12 | 10.7  |
|                                                  | 17  | BD | C9-C10  | 609 | BD* | N4-C7   | 23.22 |
|                                                  | 17  | BD | C9-C10  | 623 | BD* | C11-C12 | 15.99 |
|                                                  | 22  | BD | C11-C12 | 613 | BD* | N6-C8   | 21.62 |
|                                                  | 22  | BD | C11-C12 | 618 | BD* | C9-C10  | 15.9  |
|                                                  | 25  | BD | C13-C14 | 618 | BD* | C9-C10  | 10.47 |
|                                                  | 25  | BD | C13-C14 | 635 | BD* | C17-C24 | 19.48 |
|                                                  | 25  | BD | C13-C14 | 645 | BD* | C25-C26 | 20.2  |
|                                                  | 30  | BD | C16-C19 | 639 | BD* | C21-C22 | 17.57 |
|                                                  | 30  | BD | C16-C19 | 649 | BD* | C27-C29 | 20.03 |
|                                                  | 34  | BD | C17-C24 | 626 | BD* | C13-C14 | 19.84 |
|                                                  | 34  | BD | C17-C24 | 645 | BD* | C25-C26 | 19.97 |
|                                                  | 38  | BD | C21-C22 | 631 | BD* | C16-C19 | 20.8  |
|                                                  | 38  | BD | C21-C22 | 649 | BD* | C27-C29 | 18.22 |
|                                                  | 44  | BD | C25-C26 | 626 | BD* | C13-C14 | 20.53 |
|                                                  | 44  | BD | C25-C26 | 635 | BD* | C17-C24 | 20.34 |
|                                                  | 48  | BD | C27-C29 | 631 | BD* | C16-C19 | 19.32 |
|                                                  | 48  | BD | C27-C29 | 639 | BD* | C21-C22 | 19.5  |
| <b>n-<math>\pi^*</math></b>                      |     |    |         |     |     |         |       |
|                                                  | 97  | LP | S1      | 609 | BD* | N4-C7   | 20.17 |
|                                                  | 97  | LP | S1      | 613 | BD* | N6-C8   | 20.51 |
|                                                  | 99  | LP | O2      | 623 | BD* | C11-C12 | 15.19 |
|                                                  | 99  | LP | O2      | 631 | BD* | C16-C19 | 12.64 |
|                                                  | 104 | LP | O5      | 639 | BD* | C21-C22 | 29.49 |
|                                                  | 108 | LP | F47     | 623 | BD* | C11-C12 | 19.74 |

|                                            |     |         |         |     |         |         |       |
|--------------------------------------------|-----|---------|---------|-----|---------|---------|-------|
|                                            | 111 | LP      | F48     | 618 | BD*     | C9-C10  | 18.98 |
| CB                                         |     |         |         |     |         |         |       |
| <b><math>\pi</math>-<math>\pi^*</math></b> |     |         |         |     |         |         |       |
|                                            | 8   | BD      | N4-C7   | 644 | BD*     | N6-C8   | 14.4  |
|                                            | 8   | BD      | N4-C7   | 649 | BD*     | C9-C10  | 10.45 |
|                                            | 12  | BD      | N6-C8   | 640 | BD*     | N4-C7   | 14.45 |
|                                            | 12  | BD      | N6-C8   | 654 | BD*     | C11-C12 | 11.4  |
|                                            | 17  | BD      | C9-C10  | 640 | BD*     | N4-C7   | 22.91 |
|                                            | 17  | BD      | C9-C10  | 654 | BD*     | C11-C12 | 14.57 |
|                                            | 17  | BD      | C9-C10  | 699 | BD*     | C48-N50 | 17.15 |
|                                            | 22  | BD      | C11-C12 | 644 | BD*     | N6-C8   | 20.7  |
|                                            | 22  | BD      | C11-C12 | 649 | BD*     | C9-C10  | 15.24 |
|                                            | 26  | BD      | C13-C17 | 661 | BD*     | C14-C26 | 16.24 |
|                                            | 26  | BD      | C13-C17 | 674 | BD*     | C24-C25 | 19.46 |
|                                            | 29  | BD      | C14-C26 | 658 | BD*     | C13-C17 | 16.25 |
|                                            | 29  | BD      | C14-C26 | 674 | BD*     | C24-C25 | 20.2  |
|                                            | 31  | BD      | C16-C19 | 670 | BD*     | C21-C22 | 16.56 |
|                                            | 31  | BD      | C16-C19 | 680 | BD*     | C27-C29 | 20.16 |
|                                            | 38  | BD      | C21-C22 | 663 | BD*     | C16-C19 | 21.87 |
|                                            | 38  | BD      | C21-C22 | 680 | BD*     | C27-C29 | 17.95 |
|                                            | 42  | BD      | C24-C25 | 658 | BD*     | C13-C17 | 16.99 |
| 42                                         | BD  | C24-C25 | 661     | BD* | C14-C26 | 16.15   |       |
| 48                                         | BD  | C27-C29 | 663     | BD* | C16-C19 | 18.93   |       |
| 48                                         | BD  | C27-C29 | 670     | BD* | C21-C22 | 19.68   |       |
| <b>n-<math>\pi</math>*</b>                 |     |         |         |     |         |         |       |
|                                            | 105 | LP      | S1      | 640 | BD*     | N4-C7   | 19.99 |
|                                            | 105 | LP      | S1      | 644 | BD*     | N6-C8   | 20.65 |
|                                            | 107 | LP      | O2      | 654 | BD*     | C11-C12 | 23.91 |
|                                            | 112 | LP      | O5      | 670 | BD*     | C21-C22 | 30.29 |
|                                            | 114 | LP      | N49     | 655 | BD*     | C12-C47 | 13.1  |
|                                            | 115 | LP      | N50     | 652 | BD*     | C10-C48 | 13.03 |
| NB                                         |     |         |         |     |         |         |       |
| <b><math>\pi</math>-<math>\pi^*</math></b> |     |         |         |     |         |         |       |
|                                            | 9   | BD      | N4-C7   | 673 | BD*     | S1-N6   | 13.15 |
|                                            | 9   | BD      | N4-C7   | 687 | BD*     | C9-C10  | 10.45 |
|                                            | 17  | BD      | C9-C10  | 679 | BD*     | N4-C7   | 21.65 |
|                                            | 17  | BD      | C9-C10  | 692 | BD*     | C11-C12 | 15.72 |
|                                            | 22  | BD      | C11-C12 | 687 | BD*     | C9-C10  | 16.77 |
|                                            | 26  | BD      | C13-C17 | 699 | BD*     | C14-C26 | 18.69 |

|                                                  |     |    |         |     |     |         |         |
|--------------------------------------------------|-----|----|---------|-----|-----|---------|---------|
|                                                  | 26  | BD | C13-C17 | 712 | BD* | C24-C25 | 19.25   |
|                                                  | 29  | BD | C14-C26 | 696 | BD* | C13-C17 | 20.6    |
|                                                  | 29  | BD | C14-C26 | 712 | BD* | C24-C25 | 20.24   |
|                                                  | 31  | BD | C16-C19 | 708 | BD* | C21-C22 | 16.66   |
|                                                  | 31  | BD | C16-C19 | 718 | BD* | C27-C29 | 20.02   |
|                                                  | 38  | BD | C21-C22 | 701 | BD* | C16-C19 | 22.04   |
|                                                  | 38  | BD | C21-C22 | 718 | BD* | C27-C29 | 17.47   |
|                                                  | 42  | BD | C24-C25 | 696 | BD* | C13-C17 | 20.52   |
|                                                  | 42  | BD | C24-C25 | 699 | BD* | C14-C26 | 19.97   |
|                                                  | 48  | BD | C27-C29 | 701 | BD* | C16-C19 | 19.21   |
|                                                  | 48  | BD | C27-C29 | 708 | BD* | C21-C22 | 19.6    |
| <b><math>\sigma</math>-<math>\sigma^*</math></b> |     |    |         |     |     |         |         |
|                                                  | 20  | BD | C10-N47 | 735 | BD* | N48-O49 | 14.02   |
|                                                  | 64  | BD | N47-O52 | 735 | BD* | N48-O49 | 34.69   |
| <b><math>n</math>-<math>\pi^*</math></b>         |     |    |         |     |     |         |         |
|                                                  | 108 | LP | O2      | 692 | BD* | C11-C12 | 22.21   |
|                                                  | 113 | LP | O5      | 708 | BD* | C21-C22 | 30.28   |
|                                                  | 118 | LP | O49     | 737 | BD* | N48-O50 | 124.01  |
|                                                  | 125 | LP | O52     | 733 | BD* | N47-O51 | 29.75   |
| <b><math>n</math>-<math>\sigma^*</math></b>      |     |    |         |     |     |         |         |
|                                                  | 117 | LP | O49     | 693 | BD* | C12-N48 | 12.18   |
|                                                  | 117 | LP | O49     | 736 | BD* | N48-O50 | 17.8    |
|                                                  | 120 | LP | O50     | 693 | BD* | C12-N48 | 12.68   |
|                                                  | 122 | LP | O51     | 690 | BD* | C10-N47 | 13.11   |
|                                                  | 124 | LP | O52     | 690 | BD* | C10-N47 | 11.82   |
|                                                  | 124 | LP | O52     | 732 | BD* | N47-O51 | 18.02   |
| CAB                                              |     |    |         |     |     |         |         |
| <b><math>n</math>-<math>\sigma^*</math></b>      |     |    |         |     |     |         |         |
|                                                  | 5   | BD | O3-C25  | 722 | BD* | C27-C29 | 1008.87 |
|                                                  | 5   | BD | O3-C25  | 725 | BD* | C31-H33 | 22.89   |
|                                                  | 5   | BD | O3-C25  | 739 | BD* | O48-H53 | 33.12   |
|                                                  | 5   | BD | O3-C25  | 742 | BD* | O50-C52 | 43.85   |
|                                                  | 5   | BD | O3-C25  | 743 | BD* | O50-C52 | 470.19  |
|                                                  | 6   | BD | O3-C31  | 743 | BD* | O50-C52 | 24.47   |
|                                                  | 8   | BD | N4-C7   | 686 | BD* | N6-C8   | 14.69   |
|                                                  | 9   | BD | O5-C21  | 722 | BD* | C27-C29 | 31.34   |
|                                                  | 9   | BD | O5-C21  | 743 | BD* | O50-C52 | 29.27   |
|                                                  | 10  | BD | O5-C43  | 725 | BD* | C31-H33 | 15.74   |
|                                                  | 10  | BD | O5-C43  | 739 | BD* | O48-H53 | 23.97   |
|                                                  | 10  | BD | O5-C43  | 742 | BD* | O50-C52 | 29.58   |

|    |    |         |     |     |         |         |
|----|----|---------|-----|-----|---------|---------|
| 10 | BD | O5-C43  | 743 | BD* | O50-C52 | 397.34  |
| 12 | BD | N6-C8   | 682 | BD* | N4-C7   | 13.91   |
| 12 | BD | N6-C8   | 696 | BD* | C11-C12 | 10.79   |
| 14 | BD | C7-C9   | 743 | BD* | O50-C52 | 123.97  |
| 16 | BD | C9-C10  | 743 | BD* | O50-C52 | 219.79  |
| 17 | BD | C9-C10  | 682 | BD* | N4-C7   | 22.01   |
| 17 | BD | C9-C10  | 696 | BD* | C11-C12 | 15.05   |
| 17 | BD | C9-C10  | 725 | BD* | C31-H33 | 68.94   |
| 17 | BD | C9-C10  | 739 | BD* | O48-H53 | 50.75   |
| 17 | BD | C9-C10  | 742 | BD* | O50-C52 | 12.78   |
| 18 | BD | C9-C13  | 725 | BD* | C31-H33 | 17.65   |
| 18 | BD | C9-C13  | 739 | BD* | O48-H53 | 31.49   |
| 18 | BD | C9-C13  | 742 | BD* | O50-C52 | 33.41   |
| 19 | BD | C10-C12 | 743 | BD* | O50-C52 | 130.56  |
| 20 | BD | C10-C52 | 706 | BD* | C16-C29 | 13.86   |
| 20 | BD | C10-C52 | 725 | BD* | C31-H33 | 58.24   |
| 20 | BD | C10-C52 | 739 | BD* | O48-H53 | 19.12   |
| 20 | BD | C10-C52 | 742 | BD* | O50-C52 | 32.41   |
| 22 | BD | C11-C12 | 686 | BD* | N6-C8   | 22.26   |
| 22 | BD | C11-C12 | 691 | BD* | C9-C10  | 14.75   |
| 26 | BD | C13-C17 | 703 | BD* | C14-C26 | 21.28   |
| 26 | BD | C13-C17 | 716 | BD* | C24-C25 | 21.1    |
| 26 | BD | C13-C17 | 739 | BD* | O48-H53 | 20.14   |
| 27 | BD | C14-H15 | 739 | BD* | O48-H53 | 11.84   |
| 27 | BD | C14-H15 | 742 | BD* | O50-C52 | 10.96   |
| 28 | BD | C14-C26 | 742 | BD* | O50-C52 | 10.52   |
| 29 | BD | C14-C26 | 700 | BD* | C13-C17 | 19.25   |
| 29 | BD | C14-C26 | 716 | BD* | C24-C25 | 20.09   |
| 30 | BD | C16-C19 | 743 | BD* | O50-C52 | 190.49  |
| 31 | BD | C16-C19 | 712 | BD* | C21-C22 | 16.4    |
| 36 | BD | C19-C22 | 743 | BD* | O50-C52 | 77.35   |
| 37 | BD | C21-C22 | 743 | BD* | O50-C52 | 148.03  |
| 38 | BD | C21-C22 | 705 | BD* | C16-C19 | 22.54   |
| 39 | BD | C21-C27 | 743 | BD* | O50-C52 | 28.2    |
| 41 | BD | C24-C25 | 743 | BD* | O50-C52 | 1008.87 |
| 42 | BD | C24-C25 | 700 | BD* | C13-C17 | 20.18   |
| 42 | BD | C24-C25 | 703 | BD* | C14-C26 | 21.28   |
| 46 | BD | C27-H28 | 706 | BD* | C16-C29 | 17.97   |
| 46 | BD | C27-H28 | 725 | BD* | C31-H33 | 25.46   |
| 46 | BD | C27-H28 | 739 | BD* | O48-H53 | 31.15   |
| 46 | BD | C27-H28 | 742 | BD* | O50-C52 | 31.97   |

|  |    |    |         |     |     |         |         |
|--|----|----|---------|-----|-----|---------|---------|
|  | 47 | BD | C27-C29 | 743 | BD* | O50-C52 | 224.56  |
|  | 48 | BD | C27-C29 | 705 | BD* | C16-C19 | 19.44   |
|  | 48 | BD | C27-C29 | 712 | BD* | C21-C22 | 19.79   |
|  | 64 | BD | 048-C51 | 738 | BD* | 048-C51 | 11.81   |
|  | 64 | BD | 048-C51 | 743 | BD* | O50-C52 | 15.4    |
|  | 65 | BD | 048-H53 | 737 | BD* | O47-C51 | 46.7    |
|  | 65 | BD | 048-H53 | 738 | BD* | 048-C51 | 34.76   |
|  | 65 | BD | 048-H53 | 743 | BD* | O50-C52 | 372.04  |
|  | 66 | BD | 049-C52 | 679 | BD* | O3-C25  | 50.81   |
|  | 66 | BD | 049-C52 | 680 | BD* | O3-C31  | 20.89   |
|  | 66 | BD | 049-C52 | 699 | BD* | C13-C17 | 36.37   |
|  | 66 | BD | 049-C52 | 706 | BD* | C16-C29 | 79.11   |
|  | 66 | BD | 049-C52 | 717 | BD* | C24-C35 | 11      |
|  | 66 | BD | 049-C52 | 718 | BD* | C25-C26 | 34.2    |
|  | 66 | BD | 049-C52 | 719 | BD* | C26-C39 | 45.14   |
|  | 66 | BD | 049-C52 | 721 | BD* | C27-C29 | 18.26   |
|  | 66 | BD | 049-C52 | 722 | BD* | C27-C29 | 9004.68 |
|  | 66 | BD | 049-C52 | 725 | BD* | C31-H33 | 308.18  |
|  | 66 | BD | 049-C52 | 727 | BD* | C35-H36 | 13.36   |
|  | 66 | BD | 049-C52 | 731 | BD* | C39-H41 | 10.81   |
|  | 66 | BD | 049-C52 | 733 | BD* | C43-H44 | 14.55   |
|  | 66 | BD | 049-C52 | 739 | BD* | O48-H53 | 140.97  |
|  | 66 | BD | 049-C52 | 742 | BD* | O50-C52 | 436.64  |
|  | 66 | BD | 049-C52 | 743 | BD* | O50-C52 | 6898.72 |
|  | 67 | BD | 049-H54 | 679 | BD* | O3-C25  | 136.68  |
|  | 67 | BD | 049-H54 | 680 | BD* | O3-C31  | 49.15   |
|  | 67 | BD | 049-H54 | 687 | BD* | C7-C8   | 15.91   |
|  | 67 | BD | 049-H54 | 690 | BD* | C9-C10  | 11.45   |
|  | 67 | BD | 049-H54 | 699 | BD* | C13-C17 | 48.79   |
|  | 67 | BD | 049-H54 | 706 | BD* | C16-C29 | 109.3   |
|  | 67 | BD | 049-H54 | 717 | BD* | C24-C35 | 12.29   |
|  | 67 | BD | 049-H54 | 718 | BD* | C25-C26 | 33.37   |
|  | 67 | BD | 049-H54 | 719 | BD* | C26-C39 | 61.6    |
|  | 67 | BD | 049-H54 | 721 | BD* | C27-C29 | 38.71   |
|  | 67 | BD | 049-H54 | 724 | BD* | C31-H32 | 16.31   |
|  | 67 | BD | 049-H54 | 725 | BD* | C31-H33 | 1437.49 |
|  | 67 | BD | 049-H54 | 727 | BD* | C35-H36 | 38.87   |
|  | 67 | BD | 049-H54 | 729 | BD* | C35-H38 | 10.69   |
|  | 67 | BD | 049-H54 | 731 | BD* | C39-H41 | 18.47   |
|  | 67 | BD | 049-H54 | 732 | BD* | C39-H42 | 11.03   |
|  | 67 | BD | 049-H54 | 733 | BD* | C43-H44 | 28.22   |



|             |     |    |         |     |     |         |          |
|-------------|-----|----|---------|-----|-----|---------|----------|
|             | 67  | BD | 049-H54 | 739 | BD* | 048-H53 | 2007.09  |
|             | 67  | BD | 049-H54 | 742 | BD* | 050-C52 | 626.5    |
|             | 68  | BD | 050-C52 | 722 | BD* | C27-C29 | 19.03    |
|             | 68  | BD | 050-C52 | 743 | BD* | 050-C52 | 12.13    |
| <b>n-π*</b> |     |    |         |     |     |         |          |
|             | 109 | LP | S1      | 682 | BD* | N4-C7   | 19.52    |
|             | 109 | LP | S1      | 686 | BD* | N6-C8   | 19.84    |
|             | 110 | LP | 02      | 679 | BD* | 03-C25  | 28.99    |
|             | 110 | LP | 02      | 680 | BD* | 03-C31  | 10.81    |
|             | 110 | LP | 02      | 699 | BD* | C13-C17 | 14.13    |
|             | 110 | LP | 02      | 706 | BD* | C16-C29 | 57.48    |
|             | 110 | LP | 02      | 718 | BD* | C25-C26 | 10.57    |
|             | 110 | LP | 02      | 719 | BD* | C26-C39 | 15.44    |
|             | 110 | LP | 02      | 721 | BD* | C27-C29 | 12.7     |
|             | 110 | LP | 02      | 725 | BD* | C31-H33 | 142.27   |
|             | 110 | LP | 02      | 739 | BD* | 048-H53 | 326.63   |
|             | 110 | LP | 02      | 742 | BD* | 050-C52 | 194.22   |
|             | 110 | LP | 02      | 743 | BD* | 050-C52 | 25981.84 |
|             | 111 | LP | 02      | 705 | BD* | C16-C19 | 10.23    |
|             | 111 | LP | 02      | 739 | BD* | 048-H53 | 11.34    |
|             | 112 | LP | 03      | 725 | BD* | C31-H33 | 10.7     |
|             | 116 | LP | 05      | 712 | BD* | C21-C22 | 30.5     |
|             | 118 | LP | 047     | 743 | BD* | 050-C52 | 269.43   |
|             | 119 | LP | 047     | 697 | BD* | C12-C51 | 19.85    |
|             | 119 | LP | 047     | 739 | BD* | 048-H53 | 20.61    |
|             | 120 | LP | 048     | 679 | BD* | 03-C25  | 19.54    |
|             | 120 | LP | 048     | 706 | BD* | C16-C29 | 19.23    |
|             | 120 | LP | 048     | 719 | BD* | C26-C39 | 10.18    |
|             | 120 | LP | 048     | 725 | BD* | C31-H33 | 100.25   |
|             | 120 | LP | 048     | 737 | BD* | 047-C51 | 25.4     |
|             | 120 | LP | 048     | 739 | BD* | 048-H53 | 103.58   |
|             | 120 | LP | 048     | 742 | BD* | 050-C52 | 104.17   |
|             | 122 | LP | 049     | 675 | BD* | S1-N4   | 10       |
|             | 122 | LP | 049     | 679 | BD* | 03-C25  | 64.11    |
|             | 122 | LP | 049     | 680 | BD* | 03-C31  | 26.12    |
|             | 122 | LP | 049     | 699 | BD* | C13-C17 | 38.29    |
|             | 122 | LP | 049     | 706 | BD* | C16-C29 | 84.19    |
|             | 122 | LP | 049     | 717 | BD* | C24-C35 | 11.25    |
|             | 122 | LP | 049     | 718 | BD* | C25-C26 | 33.97    |
|             | 122 | LP | 049     | 719 | BD* | C26-C39 | 45.16    |
|             | 122 | LP | 049     | 721 | BD* | C27-C29 | 20.95    |

|             |     |    |     |     |     |         |          |
|-------------|-----|----|-----|-----|-----|---------|----------|
|             | 122 | LP | 049 | 725 | BD* | C31-H33 | 386.43   |
|             | 122 | LP | 049 | 727 | BD* | C35-H36 | 16.24    |
|             | 122 | LP | 049 | 733 | BD* | C43-H44 | 13.81    |
|             | 122 | LP | 049 | 739 | BD* | 048-H53 | 240.31   |
|             | 122 | LP | 049 | 742 | BD* | 050-C52 | 624.81   |
|             | 125 | LP | 050 | 694 | BD* | C10-C52 | 20.66    |
|             | 109 | LP | S1  | 682 | BD* | N4-C7   | 19.52    |
|             | 109 | LP | S1  | 686 | BD* | N6-C8   | 19.84    |
|             | 110 | LP | 02  | 743 | BD* | 050-C52 | 25981.84 |
|             | 111 | LP | 02  | 705 | BD* | C16-C19 | 10.23    |
|             | 116 | LP | 05  | 712 | BD* | C21-C22 | 30.5     |
|             | 118 | LP | 047 | 743 | BD* | 050-C52 | 269.43   |
|             | 120 | LP | 048 | 737 | BD* | 047-C51 | 25.4     |
| <b>n-σ*</b> |     |    |     |     |     |         |          |
|             | 110 | LP | 02  | 679 | BD* | 03-C25  | 28.99    |
|             | 110 | LP | 02  | 680 | BD* | 03-C31  | 10.81    |
|             | 110 | LP | 02  | 699 | BD* | C13-C17 | 14.13    |
|             | 110 | LP | 02  | 706 | BD* | C16-C29 | 57.48    |
|             | 110 | LP | 02  | 718 | BD* | C25-C26 | 10.57    |
|             | 110 | LP | 02  | 719 | BD* | C26-C39 | 15.44    |
|             | 110 | LP | 02  | 721 | BD* | C27-C29 | 12.7     |
|             | 110 | LP | 02  | 725 | BD* | C31-H33 | 142.27   |
|             | 110 | LP | 02  | 739 | BD* | 048-H53 | 326.63   |
|             | 110 | LP | 02  | 742 | BD* | 050-C52 | 194.22   |
|             | 111 | LP | 02  | 739 | BD* | 048-H53 | 11.34    |
|             | 112 | LP | 03  | 725 | BD* | C31-H33 | 10.7     |
|             | 119 | LP | 047 | 697 | BD* | C12-C51 | 19.85    |
|             | 119 | LP | 047 | 739 | BD* | 048-H53 | 20.61    |
|             | 120 | LP | 048 | 679 | BD* | 03-C25  | 19.54    |
|             | 120 | LP | 048 | 706 | BD* | C16-C29 | 19.23    |
|             | 120 | LP | 048 | 719 | BD* | C26-C39 | 10.18    |
|             | 120 | LP | 048 | 725 | BD* | C31-H33 | 100.25   |
|             | 120 | LP | 048 | 739 | BD* | 048-H53 | 103.58   |
|             | 120 | LP | 048 | 742 | BD* | 050-C52 | 104.17   |
|             | 122 | LP | 049 | 675 | BD* | S1-N4   | 10       |
|             | 122 | LP | 049 | 679 | BD* | 03-C25  | 64.11    |
|             | 122 | LP | 049 | 680 | BD* | 03-C31  | 26.12    |
|             | 122 | LP | 049 | 699 | BD* | C13-C17 | 38.29    |
|             | 122 | LP | 049 | 706 | BD* | C16-C29 | 84.19    |
|             | 122 | LP | 049 | 717 | BD* | C24-C35 | 11.25    |
|             | 122 | LP | 049 | 718 | BD* | C25-C26 | 33.97    |

|                                                 |     |    |         |     |     |         |         |
|-------------------------------------------------|-----|----|---------|-----|-----|---------|---------|
|                                                 | 122 | LP | 049     | 719 | BD* | C26-C39 | 45.16   |
|                                                 | 122 | LP | 049     | 721 | BD* | C27-C29 | 20.95   |
|                                                 | 122 | LP | 049     | 725 | BD* | C31-H33 | 386.43  |
|                                                 | 122 | LP | 049     | 727 | BD* | C35-H36 | 16.24   |
|                                                 | 122 | LP | 049     | 733 | BD* | C43-H44 | 13.81   |
|                                                 | 122 | LP | 049     | 739 | BD* | 048-H53 | 240.31  |
|                                                 | 122 | LP | 049     | 742 | BD* | 050-C52 | 624.81  |
|                                                 | 125 | LP | 050     | 694 | BD* | C10-C52 | 20.66   |
| <b><math>\sigma</math>-<math>\pi</math>*</b>    |     |    |         |     |     |         |         |
|                                                 | 5   | BD | 03-C25  | 722 | BD* | C27-C29 | 1008.87 |
|                                                 | 5   | BD | 03-C25  | 743 | BD* | 050-C52 | 470.19  |
|                                                 | 6   | BD | 03-C31  | 743 | BD* | 050-C52 | 24.47   |
|                                                 | 9   | BD | 05-C21  | 722 | BD* | C27-C29 | 31.34   |
|                                                 | 9   | BD | 05-C21  | 743 | BD* | 050-C52 | 29.27   |
|                                                 | 10  | BD | 05-C43  | 743 | BD* | 050-C52 | 397.34  |
|                                                 | 14  | BD | C7-C9   | 743 | BD* | 050-C52 | 123.97  |
|                                                 | 16  | BD | C9-C10  | 743 | BD* | 050-C52 | 219.79  |
|                                                 | 19  | BD | C10-C12 | 743 | BD* | 050-C52 | 130.56  |
|                                                 | 30  | BD | C16-C19 | 743 | BD* | 050-C52 | 190.49  |
|                                                 | 36  | BD | C19-C22 | 743 | BD* | 050-C52 | 77.35   |
|                                                 | 37  | BD | C21-C22 | 743 | BD* | 050-C52 | 148.03  |
|                                                 | 39  | BD | C21-C27 | 743 | BD* | 050-C52 | 28.2    |
|                                                 | 41  | BD | C24-C25 | 743 | BD* | 050-C52 | 1008.87 |
|                                                 | 47  | BD | C27-C29 | 743 | BD* | 050-C52 | 224.56  |
|                                                 | 64  | BD | 048-C51 | 743 | BD* | 050-C52 | 15.4    |
|                                                 | 65  | BD | 048-H53 | 737 | BD* | 047-C51 | 46.7    |
|                                                 | 65  | BD | 048-H53 | 743 | BD* | 050-C52 | 372.04  |
|                                                 | 66  | BD | 049-C52 | 722 | BD* | C27-C29 | 9004.68 |
|                                                 | 66  | BD | 049-C52 | 743 | BD* | 050-C52 | 6898.72 |
|                                                 | 68  | BD | 050-C52 | 722 | BD* | C27-C29 | 19.03   |
|                                                 | 68  | BD | 050-C52 | 743 | BD* | 050-C52 | 12.13   |
| <b><math>\sigma</math>-<math>\sigma</math>*</b> |     |    |         |     |     |         |         |
|                                                 | 5   | BD | 03-C25  | 725 | BD* | C31-H33 | 22.89   |
|                                                 | 5   | BD | 03-C25  | 739 | BD* | 048-H53 | 33.12   |
|                                                 | 5   | BD | 03-C25  | 742 | BD* | 050-C52 | 43.85   |
|                                                 | 10  | BD | 05-C43  | 725 | BD* | C31-H33 | 15.74   |
|                                                 | 10  | BD | 05-C43  | 739 | BD* | 048-H53 | 23.97   |
|                                                 | 10  | BD | 05-C43  | 742 | BD* | 050-C52 | 29.58   |
|                                                 | 18  | BD | C9-C13  | 725 | BD* | C31-H33 | 17.65   |
|                                                 | 18  | BD | C9-C13  | 739 | BD* | 048-H53 | 31.49   |
|                                                 | 18  | BD | C9-C13  | 742 | BD* | 050-C52 | 33.41   |

|  |    |    |         |     |     |         |         |
|--|----|----|---------|-----|-----|---------|---------|
|  | 20 | BD | C10-C52 | 706 | BD* | C16-C29 | 13.86   |
|  | 20 | BD | C10-C52 | 725 | BD* | C31-H33 | 58.24   |
|  | 20 | BD | C10-C52 | 739 | BD* | O48-H53 | 19.12   |
|  | 20 | BD | C10-C52 | 742 | BD* | O50-C52 | 32.41   |
|  | 27 | BD | C14-H15 | 739 | BD* | O48-H53 | 11.84   |
|  | 27 | BD | C14-H15 | 742 | BD* | O50-C52 | 10.96   |
|  | 28 | BD | C14-C26 | 742 | BD* | O50-C52 | 10.52   |
|  | 46 | BD | C27-H28 | 706 | BD* | C16-C29 | 17.97   |
|  | 46 | BD | C27-H28 | 725 | BD* | C31-H33 | 25.46   |
|  | 46 | BD | C27-H28 | 739 | BD* | O48-H53 | 31.15   |
|  | 46 | BD | C27-H28 | 742 | BD* | O50-C52 | 31.97   |
|  | 64 | BD | O48-C51 | 738 | BD* | O48-C51 | 11.81   |
|  | 65 | BD | O48-H53 | 738 | BD* | O48-C51 | 34.76   |
|  | 66 | BD | O49-C52 | 679 | BD* | O3-C25  | 50.81   |
|  | 66 | BD | O49-C52 | 680 | BD* | O3-C31  | 20.89   |
|  | 66 | BD | O49-C52 | 699 | BD* | C13-C17 | 36.37   |
|  | 66 | BD | O49-C52 | 706 | BD* | C16-C29 | 79.11   |
|  | 66 | BD | O49-C52 | 717 | BD* | C24-C35 | 11      |
|  | 66 | BD | O49-C52 | 718 | BD* | C25-C26 | 34.2    |
|  | 66 | BD | O49-C52 | 719 | BD* | C26-C39 | 45.14   |
|  | 66 | BD | O49-C52 | 721 | BD* | C27-C29 | 18.26   |
|  | 66 | BD | O49-C52 | 725 | BD* | C31-H33 | 308.18  |
|  | 66 | BD | O49-C52 | 727 | BD* | C35-H36 | 13.36   |
|  | 66 | BD | O49-C52 | 731 | BD* | C39-H41 | 10.81   |
|  | 66 | BD | O49-C52 | 733 | BD* | C43-H44 | 14.55   |
|  | 66 | BD | O49-C52 | 739 | BD* | O48-H53 | 140.97  |
|  | 66 | BD | O49-C52 | 742 | BD* | O50-C52 | 436.64  |
|  | 67 | BD | O49-H54 | 679 | BD* | O3-C25  | 136.68  |
|  | 67 | BD | O49-H54 | 680 | BD* | O3-C31  | 49.15   |
|  | 67 | BD | O49-H54 | 687 | BD* | C7-C8   | 15.91   |
|  | 67 | BD | O49-H54 | 690 | BD* | C9-C10  | 11.45   |
|  | 67 | BD | O49-H54 | 699 | BD* | C13-C17 | 48.79   |
|  | 67 | BD | O49-H54 | 706 | BD* | C16-C29 | 109.3   |
|  | 67 | BD | O49-H54 | 717 | BD* | C24-C35 | 12.29   |
|  | 67 | BD | O49-H54 | 718 | BD* | C25-C26 | 33.37   |
|  | 67 | BD | O49-H54 | 719 | BD* | C26-C39 | 61.6    |
|  | 67 | BD | O49-H54 | 721 | BD* | C27-C29 | 38.71   |
|  | 67 | BD | O49-H54 | 724 | BD* | C31-H32 | 16.31   |
|  | 67 | BD | O49-H54 | 725 | BD* | C31-H33 | 1437.49 |
|  | 67 | BD | O49-H54 | 727 | BD* | C35-H36 | 38.87   |
|  | 67 | BD | O49-H54 | 729 | BD* | C35-H38 | 10.69   |

|                                              |    |    |         |     |     |         |         |
|----------------------------------------------|----|----|---------|-----|-----|---------|---------|
|                                              | 67 | BD | 049-H54 | 731 | BD* | C39-H41 | 18.47   |
|                                              | 67 | BD | 049-H54 | 732 | BD* | C39-H42 | 11.03   |
|                                              | 67 | BD | 049-H54 | 733 | BD* | C43-H44 | 28.22   |
|                                              | 67 | BD | 049-H54 | 739 | BD* | O48-H53 | 2007.09 |
|                                              | 67 | BD | 049-H54 | 742 | BD* | O50-C52 | 626.5   |
| <b><math>\pi</math>-<math>\pi</math>*</b>    |    |    |         |     |     |         |         |
|                                              | 8  | BD | N4-C7   | 686 | BD* | N6-C8   | 14.69   |
|                                              | 22 | BD | C11-C12 | 686 | BD* | N6-C8   | 22.26   |
|                                              | 22 | BD | C11-C12 | 691 | BD* | C9-C10  | 14.75   |
|                                              | 26 | BD | C13-C17 | 703 | BD* | C14-C26 | 21.28   |
|                                              | 26 | BD | C13-C17 | 716 | BD* | C24-C25 | 21.1    |
|                                              | 29 | BD | C14-C26 | 700 | BD* | C13-C17 | 19.25   |
|                                              | 29 | BD | C14-C26 | 716 | BD* | C24-C25 | 20.09   |
|                                              | 31 | BD | C16-C19 | 712 | BD* | C21-C22 | 16.4    |
|                                              | 38 | BD | C21-C22 | 705 | BD* | C16-C19 | 22.54   |
|                                              | 42 | BD | C24-C25 | 700 | BD* | C13-C17 | 20.18   |
|                                              | 42 | BD | C24-C25 | 703 | BD* | C14-C26 | 21.28   |
|                                              | 48 | BD | C27-C29 | 705 | BD* | C16-C19 | 19.44   |
|                                              | 48 | BD | C27-C29 | 712 | BD* | C21-C22 | 19.79   |
| <b><math>\pi</math>-<math>\sigma</math>*</b> |    |    |         |     |     |         |         |
|                                              | 17 | BD | C9-C10  | 725 | BD* | C31-H33 | 68.94   |
|                                              | 17 | BD | C9-C10  | 739 | BD* | O48-H53 | 50.75   |
|                                              | 17 | BD | C9-C10  | 742 | BD* | O50-C52 | 12.78   |
|                                              | 12 | BD | N6-C8   | 682 | BD* | N4-C7   | 13.91   |
|                                              | 12 | BD | N6-C8   | 696 | BD* | C11-C12 | 10.79   |
|                                              | 17 | BD | C9-C10  | 682 | BD* | N4-C7   | 22.01   |
|                                              | 17 | BD | C9-C10  | 696 | BD* | C11-C12 | 15.05   |

Table 5: Orbital Contribution from various fragments towards HOMO and LUMO for single molecule.

| Molecule   | HOMO (%) |       |       |       | LUMO (%) |       |       |       |
|------------|----------|-------|-------|-------|----------|-------|-------|-------|
|            | Btz      | Ar-O  | Ar    | EWG   | Btz      | Ar-O  | Ar    | EWG   |
| <b>HB</b>  | 18.97    | 1.39  | 79.64 | 0     | 15.9     | 0.17  | 83.93 | 0     |
| <b>FB</b>  | 50.52    | 0.18  | 29.98 | 19.31 | 20.12    | 0.15  | 45.22 | 34.52 |
| <b>CB</b>  | 38.39    | 29.35 | 6.48  | 25.77 | 42.72    | 36.88 | 13.63 | 6.76  |
| <b>NB</b>  | 6.78     | 74.58 | 13.21 | 5.43  | 46.85    | 40.31 | 11.12 | 1.72  |
| <b>CAB</b> | 15.84    | 53.96 | 20.97 | 9.23  | 32.17    | 52.66 | 9.74  | 5.43  |

Table 6: Energies (eV) of Frontier Molecular Orbitals in eV of Btz derivatives upon aggregation

| Molecule   | HOMO-1 | HOMO  | LUMO  | LUMO+1 | HOMO-LUMO Gap |
|------------|--------|-------|-------|--------|---------------|
| <b>HB</b>  | -6.01  | -5.36 | -2.12 | -0.35  | 3.24          |
| <b>FB</b>  | -6.01  | -5.60 | -2.29 | -0.52  | 3.31          |
| <b>CB</b>  | -6.18  | -5.88 | -3.02 | -1.74  | 2.86          |
| <b>NB</b>  | -6.23  | -5.82 | -3.05 | -2.31  | 2.78          |
| <b>CAB</b> | -6.10  | -5.52 | -2.53 | -1.12  | 2.99          |

SIT 7: Computer Absorption and Emission Spectra ( $\lambda_{\max}$  in nm), for HB in comparison with experimental findings using different functionals in cyclohexane solvent

| Functional | Absorption (nm) | Emission (nm) |
|------------|-----------------|---------------|
| B3LYP      | 436             | -             |
| WB97XD     | 362             | -             |
| PBE0       | 417             | -             |
| M062X      | 389             | 466           |
| BMK        | 382             | 509           |
| CAM-B3LYP  | 372             | 483           |
| Experiment | 396             | 485           |

SIT 8: Computed Absorption Spectra ( $\lambda_{\max}$  in nm), oscillator strengths ( $f_o$ ), electronic excitation energies (eV) and transitions in different solvents using TD-DFT method at CAM-B3LYP/6-31G(d). (*H* denotes HOMO and *L* denotes LUMO)

| Molecule   | Gas   |                       |        | Transition                  |
|------------|-------|-----------------------|--------|-----------------------------|
|            | eV    | $\lambda_{\max}$ (nm) | $f_o$  |                             |
| <b>HB</b>  | 3.379 | 366.89                | 0.2333 | H→L=95%                     |
| <b>FB</b>  | 3.442 | 360.22                | 0.2659 | H→L=81%; H-1→L=13%          |
| <b>CB</b>  | 3.214 | 385.83                | 0.2108 | H→L=77%; H-1→L=16%          |
| <b>NB</b>  | 3.217 | 385.44                | 0.1543 | H→L=79%; H→L+1=4%; H-1→L=7% |
| <b>CAB</b> | 3.476 | 356.7                 | 0.1903 | H→L=83%; H-1→L=6%           |

| Molecule | Toluene |                       |        | Transition                  |
|----------|---------|-----------------------|--------|-----------------------------|
|          | eV      | $\lambda_{\max}$ (nm) | $f_o$  |                             |
| HB       | 3.320   | 373.39                | 0.2776 | H→L=95%                     |
| FB       | 3.411   | 363.49                | 0.3220 | H→L=79%; H-1→L=14%          |
| CB       | 3.223   | 384.65                | 0.2675 | H→L=73%; H-1→L=18%          |
| NB       | 3.189   | 388.75                | 0.1640 | H→L=77%; H→L+1=5%; H-1→L=6% |
| CAB      | 3.470   | 357.32                | 0.2282 | H→L=72%; H-1→L=17%          |

| Molecule | Dichloromethane |                       |        | Transition                  |
|----------|-----------------|-----------------------|--------|-----------------------------|
|          | eV              | $\lambda_{\max}$ (nm) | $f_o$  |                             |
| HB       | 3.314           | 374.15                | 0.2661 | H→L=95%                     |
| FB       | 3.424           | 362.15                | 0.3165 | H→L=78%; H-1→L=15%          |
| CB       | 3.264           | 379.83                | 0.2701 | H→L=74%; H-1→L=18%          |
| NB       | 3.181           | 389.79                | 0.1341 | H→L=76%; H→L+1=8%; H-1→L=4% |
| CAB      | 3.487           | 355.6                 | 0.2097 | H→L=72%; H-1→L=18%          |

| Molecule | Isopropanol |                       |        | Transition                  |
|----------|-------------|-----------------------|--------|-----------------------------|
|          | eV          | $\lambda_{\max}$ (nm) | $f_o$  |                             |
| HB       | 3.314       | 374.11                | 0.2612 | H→L=95%                     |
| FB       | 3.428       | 361.64                | 0.3127 | H→L=79%; H-1→L=15%          |
| CB       | 3.276       | 378.52                | 0.2683 | H→L=74%; H-1→L=18%          |
| NB       | 3.178       | 390.08                | 0.1259 | H→L=76%; H→L+1=8%; H-1→L=4% |
| CAB      | 3.491       | 355.16                | 0.2024 | H→L=73%; H-1→L=17%          |

SIT 9: Computed bond parameters in excited state.

| Molecule   | Structure | O2-C12 | O2-C18 | C9-C15 | C12-C13 | C9-C10 | C10-C13 | C12-O2-C18 | C12-O2-C18-C21 ( $\phi_1$ ) | C7-C9-C15-C16 ( $\phi_2$ ) | C13-C12-O2-C18 ( $\phi_3$ ) |
|------------|-----------|--------|--------|--------|---------|--------|---------|------------|-----------------------------|----------------------------|-----------------------------|
| <b>HB</b>  | MONOMER   | 1.340  | 1.386  | 1.445  | 1.415   | 1.432  | 1.371   | 121.84     | 131.58                      | 17.45                      | 18.78                       |
|            | ONIOM     | 1.336  | 1.381  | 1.447  | 1.410   | 1.423  | 1.373   | 124.94     | 137.92                      | 27.92                      | 9.11                        |
| <b>FB</b>  | MONOMER   | 1.338  | 1.384  | 1.446  | 1.415   | 1.428  | 1.371   | 122.84     | 149.75                      | 25.75                      | 38.92                       |
|            | ONIOM     | 1.332  | 1.374  | 1.451  | 1.414   | 1.421  | 1.375   | 128.01     | 150.59                      | 27.93                      | 22.17                       |
| <b>CB</b>  | MONOMER   | 1.402  | 1.314  | 1.481  | 1.395   | 1.425  | 1.396   | 120.29     | 171.93                      | 49.31                      | 119.23                      |
|            | ONIOM     | 1.328  | 1.388  | 1.421  | 1.412   | 1.441  | 1.414   | 126.86     | 121.02                      | 7.93                       | 6.60                        |
| <b>NB</b>  | MONOMER   | 1.398  | 1.307  | 1.487  | 1.407   | 1.436  | 1.366   | 120.34     | 179.54                      | 59.99                      | 97.06                       |
|            | ONIOM     | 1.384  | 1.318  | 1.489  | 1.374   | 1.382  | 1.442   | 121.87     | 161.86                      | 14.97                      | 37.59                       |
| <b>CAB</b> | MONOMER   | 1.356  | 1.391  | 1.452  | 1.423   | 1.432  | 1.393   | 123.26     | 149.45                      | 37.63                      | 141.60                      |
|            | ONIOM     | 1.335  | 1.367  | 1.457  | 1.424   | 1.431  | 1.401   | 126.18     | 144.07                      | 13.25                      | 8.91                        |



## Optimized XYZ Coordinates:

### SINGLE MOLECULE:

Ground State:

HB:

|   |                 |                 |                 |
|---|-----------------|-----------------|-----------------|
| S | 0.574622000000  | 3.966592000000  | -0.449953000000 |
| O | -2.982773000000 | 1.384558000000  | -0.098801000000 |
| O | 6.533926000000  | -1.542603000000 | -0.079294000000 |
| N | 1.535188000000  | 2.638547000000  | -0.343255000000 |
| O | -7.254534000000 | -2.055766000000 | 0.723687000000  |
| N | -0.903347000000 | 3.259187000000  | -0.337496000000 |
| C | 0.726910000000  | 1.577412000000  | -0.211174000000 |
| C | -0.681372000000 | 1.948046000000  | -0.211567000000 |
| C | 1.133810000000  | 0.200027000000  | -0.098517000000 |
| C | 0.102241000000  | -0.712203000000 | 0.012924000000  |
| H | 0.349295000000  | -1.762949000000 | 0.129218000000  |
| C | -1.692703000000 | 0.940032000000  | -0.091943000000 |
| C | -1.282819000000 | -0.367501000000 | 0.014221000000  |
| H | -2.017975000000 | -1.157698000000 | 0.113347000000  |
| C | 2.553915000000  | -0.226652000000 | -0.105160000000 |
| C | 3.552162000000  | 0.514884000000  | 0.546043000000  |
| H | 3.291047000000  | 1.449448000000  | 1.029353000000  |
| C | -4.018290000000 | 0.467499000000  | 0.082666000000  |
| C | 2.931260000000  | -1.411017000000 | -0.760797000000 |
| H | 2.187691000000  | -1.969852000000 | -1.322698000000 |
| C | -4.702085000000 | -0.018342000000 | -1.025053000000 |
| H | -4.385716000000 | 0.276532000000  | -2.020394000000 |
| C | -6.200976000000 | -1.232028000000 | 0.440617000000  |
| C | -5.798424000000 | -0.872759000000 | -0.851899000000 |
| H | -6.323926000000 | -1.238905000000 | -1.725515000000 |
| C | 4.249770000000  | -1.874845000000 | -0.750239000000 |
| C | 5.211477000000  | -1.122712000000 | -0.054462000000 |
| C | 4.883051000000  | 0.086002000000  | 0.581803000000  |
| C | -5.506079000000 | -0.729938000000 | 1.553251000000  |
| H | -5.840368000000 | -1.010881000000 | 2.546477000000  |
| C | -4.419565000000 | 0.119453000000  | 1.375739000000  |
| H | -3.884759000000 | 0.522054000000  | 2.229966000000  |
| C | 6.929694000000  | -2.363898000000 | 1.021270000000  |
| H | 7.978954000000  | -2.617995000000 | 0.856568000000  |
| H | 6.335274000000  | -3.285307000000 | 1.065979000000  |
| H | 6.830973000000  | -1.831048000000 | 1.975044000000  |
| C | 4.643373000000  | -3.127151000000 | -1.497469000000 |
| H | 5.501756000000  | -2.941873000000 | -2.150671000000 |
| H | 3.812189000000  | -3.489413000000 | -2.108751000000 |

|   |                 |                 |                 |
|---|-----------------|-----------------|-----------------|
| H | 4.931363000000  | -3.936697000000 | -0.816412000000 |
| C | 5.943066000000  | 0.913739000000  | 1.269939000000  |
| H | 5.584138000000  | 1.932247000000  | 1.440535000000  |
| H | 6.856075000000  | 0.960358000000  | 0.669136000000  |
| H | 6.219743000000  | 0.495036000000  | 2.245528000000  |
| C | -8.015527000000 | -2.582482000000 | -0.356544000000 |
| H | -8.793450000000 | -3.195722000000 | 0.099576000000  |
| H | -7.398136000000 | -3.207983000000 | -1.013609000000 |
| H | -8.481274000000 | -1.781882000000 | -0.944774000000 |

FB:

|   |                 |                 |                 |
|---|-----------------|-----------------|-----------------|
| S | 0.330475000000  | 3.867240000000  | -0.133662000000 |
| O | -2.934573000000 | 0.970778000000  | -1.035977000000 |
| O | 6.757327000000  | -0.901096000000 | 0.391305000000  |
| N | 1.395066000000  | 2.617834000000  | -0.088271000000 |
| O | -7.167640000000 | -1.520778000000 | 1.553396000000  |
| N | -1.060950000000 | 3.046053000000  | -0.428926000000 |
| C | 0.694890000000  | 1.497549000000  | -0.304068000000 |
| C | -0.724584000000 | 1.756354000000  | -0.504454000000 |
| C | 1.242778000000  | 0.165322000000  | -0.354061000000 |
| C | 0.309246000000  | -0.814140000000 | -0.608908000000 |
| C | -1.634261000000 | 0.683202000000  | -0.764623000000 |
| C | -1.081928000000 | -0.573130000000 | -0.828852000000 |
| C | 2.683351000000  | -0.122044000000 | -0.150277000000 |
| C | 3.401607000000  | 0.510101000000  | 0.875817000000  |
| H | 2.901008000000  | 1.227356000000  | 1.516726000000  |
| C | -3.965426000000 | 0.294494000000  | -0.377394000000 |
| C | 3.363140000000  | -1.015898000000 | -0.993026000000 |
| H | 2.833212000000  | -1.489960000000 | -1.812927000000 |
| C | -5.144055000000 | 0.110544000000  | -1.089092000000 |
| H | -5.198189000000 | 0.439186000000  | -2.121576000000 |
| C | -6.155964000000 | -0.914516000000 | 0.858609000000  |
| C | -6.246097000000 | -0.493092000000 | -0.473720000000 |
| H | -7.155912000000 | -0.629439000000 | -1.045687000000 |
| C | 4.721151000000  | -1.296292000000 | -0.820154000000 |
| C | 5.399689000000  | -0.668565000000 | 0.238892000000  |
| C | 4.759212000000  | 0.250981000000  | 1.086597000000  |
| C | -4.961636000000 | -0.717346000000 | 1.567380000000  |
| H | -4.909036000000 | -1.041677000000 | 2.601399000000  |
| C | -3.869745000000 | -0.108793000000 | 0.956585000000  |
| H | -2.954035000000 | 0.051027000000  | 1.516483000000  |
| C | 7.096913000000  | -1.953971000000 | 1.297674000000  |
| H | 8.186372000000  | -2.026017000000 | 1.292459000000  |
| H | 6.667130000000  | -2.910785000000 | 0.976218000000  |
| H | 6.752383000000  | -1.733080000000 | 2.315303000000  |
| C | 5.451165000000  | -2.225410000000 | -1.760565000000 |

|   |                 |                 |                 |
|---|-----------------|-----------------|-----------------|
| H | 6.371558000000  | -1.764193000000 | -2.131627000000 |
| H | 4.820461000000  | -2.483574000000 | -2.615441000000 |
| H | 5.739472000000  | -3.161425000000 | -1.267962000000 |
| C | 5.521481000000  | 0.962128000000  | 2.179753000000  |
| H | 4.963135000000  | 1.832958000000  | 2.533399000000  |
| H | 6.499809000000  | 1.295642000000  | 1.821746000000  |
| H | 5.698714000000  | 0.311408000000  | 3.044904000000  |
| C | -8.401585000000 | -1.752644000000 | 0.886897000000  |
| H | -9.047328000000 | -2.241455000000 | 1.617375000000  |
| H | -8.270052000000 | -2.411707000000 | 0.019248000000  |
| H | -8.865451000000 | -0.811781000000 | 0.564030000000  |
| F | -1.850975000000 | -1.643170000000 | -1.097462000000 |
| F | 0.666909000000  | -2.114135000000 | -0.663530000000 |

CB:

|   |                 |                 |                 |
|---|-----------------|-----------------|-----------------|
| S | 0.458256000000  | 3.959579000000  | -0.371336000000 |
| O | -2.865831000000 | 1.141761000000  | -0.898584000000 |
| O | 6.807746000000  | -0.711612000000 | 0.436570000000  |
| N | 1.498095000000  | 2.697860000000  | -0.245864000000 |
| O | -7.255659000000 | -1.215060000000 | 1.541093000000  |
| N | -0.956634000000 | 3.149513000000  | -0.553594000000 |
| C | 0.764532000000  | 1.581077000000  | -0.341824000000 |
| C | -0.645564000000 | 1.850709000000  | -0.525672000000 |
| C | 1.276494000000  | 0.238385000000  | -0.283470000000 |
| C | 0.330865000000  | -0.770960000000 | -0.421004000000 |
| C | -1.585965000000 | 0.779286000000  | -0.668003000000 |
| C | -1.088415000000 | -0.516012000000 | -0.643739000000 |
| C | 2.724689000000  | -0.016461000000 | -0.096258000000 |
| C | 3.428704000000  | 0.600642000000  | 0.950030000000  |
| H | 2.909764000000  | 1.276028000000  | 1.622258000000  |
| C | -3.946292000000 | 0.486520000000  | -0.286054000000 |
| C | 3.420168000000  | -0.859345000000 | -0.973945000000 |
| H | 2.899604000000  | -1.309560000000 | -1.813919000000 |
| C | -5.056613000000 | 0.215465000000  | -1.071851000000 |
| H | -5.030019000000 | 0.440956000000  | -2.132456000000 |
| C | -6.203855000000 | -0.651163000000 | 0.877311000000  |
| C | -6.193528000000 | -0.356146000000 | -0.492057000000 |
| H | -7.050151000000 | -0.571117000000 | -1.118796000000 |
| C | 4.785266000000  | -1.117272000000 | -0.814487000000 |
| C | 5.448576000000  | -0.515521000000 | 0.268694000000  |
| C | 4.788975000000  | 0.359756000000  | 1.151076000000  |
| C | -5.076634000000 | -0.357617000000 | 1.660681000000  |
| H | -5.104624000000 | -0.584577000000 | 2.721057000000  |
| C | -3.950282000000 | 0.218176000000  | 1.084390000000  |

|   |                 |                 |                 |
|---|-----------------|-----------------|-----------------|
| H | -3.084928000000 | 0.455013000000  | 1.695104000000  |
| C | 7.171800000000  | -1.895023000000 | 1.155772000000  |
| H | 8.261181000000  | -1.888508000000 | 1.225314000000  |
| H | 6.846035000000  | -2.800379000000 | 0.630596000000  |
| H | 6.740857000000  | -1.892747000000 | 2.164578000000  |
| C | 5.522079000000  | -2.003118000000 | -1.790182000000 |
| H | 6.540594000000  | -1.642019000000 | -1.956042000000 |
| H | 5.000992000000  | -2.036669000000 | -2.750835000000 |
| H | 5.592201000000  | -3.034787000000 | -1.424170000000 |
| C | 5.545155000000  | 1.036150000000  | 2.269192000000  |
| H | 4.904038000000  | 1.751340000000  | 2.791169000000  |
| H | 6.420378000000  | 1.568768000000  | 1.884073000000  |
| H | 5.912572000000  | 0.314570000000  | 3.007543000000  |
| C | -8.415958000000 | -1.571265000000 | 0.798465000000  |
| H | -9.105148000000 | -2.012886000000 | 1.518942000000  |
| H | -8.180012000000 | -2.307869000000 | 0.020568000000  |
| H | -8.883674000000 | -0.690259000000 | 0.340967000000  |
| C | -1.948510000000 | -1.633729000000 | -0.883966000000 |
| C | 0.729219000000  | -2.145525000000 | -0.309007000000 |
| N | -2.614560000000 | -2.559647000000 | -1.114393000000 |
| N | 1.021492000000  | -3.266488000000 | -0.200685000000 |

NB:

|   |                 |                 |                 |
|---|-----------------|-----------------|-----------------|
| S | 0.458401000000  | 4.077623000000  | -0.443751000000 |
| O | -2.823176000000 | 1.201620000000  | -0.938927000000 |
| O | 6.873618000000  | -0.479282000000 | 0.463373000000  |
| N | 1.511407000000  | 2.834817000000  | -0.253520000000 |
| O | -7.226845000000 | -0.935049000000 | 1.671636000000  |
| N | -0.940962000000 | 3.244114000000  | -0.633328000000 |
| C | 0.793725000000  | 1.707239000000  | -0.329794000000 |
| C | -0.614130000000 | 1.951286000000  | -0.558923000000 |
| C | 1.321732000000  | 0.373643000000  | -0.209564000000 |
| C | 0.381673000000  | -0.626458000000 | -0.324181000000 |
| C | -1.542020000000 | 0.864821000000  | -0.692234000000 |
| C | -1.010535000000 | -0.407354000000 | -0.597586000000 |
| C | 2.777121000000  | 0.139071000000  | -0.031792000000 |
| C | 3.467238000000  | 0.741154000000  | 1.029504000000  |
| H | 2.933028000000  | 1.380935000000  | 1.724538000000  |
| C | -3.904453000000 | 0.598857000000  | -0.278122000000 |
| C | 3.484852000000  | -0.659725000000 | -0.939419000000 |
| H | 2.970460000000  | -1.095645000000 | -1.791507000000 |
| C | -5.061367000000 | 0.400528000000  | -1.018882000000 |
| H | -5.064336000000 | 0.636998000000  | -2.077118000000 |
| C | -6.172453000000 | -0.425247000000 | 0.969111000000  |
| C | -6.203478000000 | -0.111219000000 | -0.396311000000 |
| H | -7.097387000000 | -0.266838000000 | -0.987628000000 |

|   |                 |                 |                 |
|---|-----------------|-----------------|-----------------|
| C | 4.856463000000  | -0.891585000000 | -0.790526000000 |
| C | 5.509449000000  | -0.306932000000 | 0.307752000000  |
| C | 4.834219000000  | 0.527607000000  | 1.217292000000  |
| C | -4.996485000000 | -0.213248000000 | 1.704077000000  |
| H | -4.989801000000 | -0.456106000000 | 2.761189000000  |
| C | -3.862751000000 | 0.304546000000  | 1.086174000000  |
| H | -2.960598000000 | 0.477405000000  | 1.664212000000  |
| C | 7.264131000000  | -1.663378000000 | 1.167316000000  |
| H | 8.353831000000  | -1.639097000000 | 1.227341000000  |
| H | 6.948990000000  | -2.568618000000 | 0.635303000000  |
| H | 6.842322000000  | -1.679536000000 | 2.179758000000  |
| C | 5.611621000000  | -1.729639000000 | -1.794096000000 |
| H | 6.606269000000  | -1.315694000000 | -1.980922000000 |
| H | 5.068624000000  | -1.780416000000 | -2.741658000000 |
| H | 5.745597000000  | -2.759443000000 | -1.441084000000 |
| C | 5.579004000000  | 1.189138000000  | 2.351675000000  |
| H | 4.929883000000  | 1.890323000000  | 2.882626000000  |
| H | 6.452999000000  | 1.733872000000  | 1.981327000000  |
| H | 5.945841000000  | 0.456705000000  | 3.079649000000  |
| C | -8.441110000000 | -1.200112000000 | 0.978889000000  |
| H | -9.124304000000 | -1.609044000000 | 1.723935000000  |
| H | -8.291145000000 | -1.935918000000 | 0.179092000000  |
| H | -8.869711000000 | -0.281912000000 | 0.557682000000  |
| N | 0.837289000000  | -2.036654000000 | -0.226710000000 |
| N | -1.890245000000 | -1.579696000000 | -0.749870000000 |
| O | -1.860357000000 | -2.418931000000 | 0.147572000000  |
| O | -2.589197000000 | -1.625550000000 | -1.756400000000 |
| O | 1.295704000000  | -2.408817000000 | 0.843524000000  |
| O | 0.731245000000  | -2.714739000000 | -1.247637000000 |

CAB:

|   |                 |                 |                 |
|---|-----------------|-----------------|-----------------|
| S | 0.853001000000  | -2.894790000000 | -1.428379000000 |
| O | 2.854716000000  | 1.111910000000  | -0.952126000000 |
| O | -6.678903000000 | -1.392381000000 | 0.290038000000  |
| N | -0.547346000000 | -2.205885000000 | -0.923859000000 |
| O | 7.177311000000  | -1.365108000000 | 1.501267000000  |
| N | 1.859190000000  | -1.600087000000 | -1.332014000000 |
| C | -0.274384000000 | -0.922859000000 | -0.653847000000 |
| C | 1.111810000000  | -0.583901000000 | -0.891804000000 |
| C | -1.230744000000 | 0.071655000000  | -0.241541000000 |
| C | -0.742881000000 | 1.351604000000  | -0.042435000000 |
| C | 1.560004000000  | 0.753841000000  | -0.661142000000 |
| C | 0.654023000000  | 1.698539000000  | -0.220608000000 |
| C | -2.666317000000 | -0.300484000000 | -0.102833000000 |
| C | -3.047624000000 | -1.328915000000 | 0.772326000000  |
| H | -2.288953000000 | -1.862209000000 | 1.337715000000  |

|   |                 |                 |                 |
|---|-----------------|-----------------|-----------------|
| C | 3.925935000000  | 0.437108000000  | -0.330523000000 |
| C | -3.652532000000 | 0.345266000000  | -0.859339000000 |
| H | -3.368714000000 | 1.119337000000  | -1.565601000000 |
| C | 5.051901000000  | 0.191303000000  | -1.101531000000 |
| H | 5.051748000000  | 0.459612000000  | -2.152613000000 |
| C | 6.145123000000  | -0.767211000000 | 0.836380000000  |
| C | 6.171813000000  | -0.410695000000 | -0.518513000000 |
| H | 7.044806000000  | -0.599270000000 | -1.131185000000 |
| C | -5.005010000000 | 0.005842000000  | -0.737665000000 |
| C | -5.355519000000 | -1.000027000000 | 0.177802000000  |
| C | -4.387431000000 | -1.691340000000 | 0.929093000000  |
| C | 4.998010000000  | -0.505941000000 | 1.601854000000  |
| H | 4.998218000000  | -0.777932000000 | 2.651988000000  |
| C | 3.889656000000  | 0.103359000000  | 1.023313000000  |
| H | 3.010406000000  | 0.319313000000  | 1.621858000000  |
| C | -7.465885000000 | -0.632506000000 | 1.212563000000  |
| H | -8.466734000000 | -1.068254000000 | 1.194294000000  |
| H | -7.522812000000 | 0.422123000000  | 0.918626000000  |
| H | -7.058545000000 | -0.697583000000 | 2.229271000000  |
| C | -6.050302000000 | 0.693949000000  | -1.582249000000 |
| H | -6.820064000000 | -0.011616000000 | -1.906793000000 |
| H | -5.594050000000 | 1.148847000000  | -2.465366000000 |
| H | -6.551896000000 | 1.496530000000  | -1.027890000000 |
| C | -4.790842000000 | -2.815181000000 | 1.853239000000  |
| H | -3.908631000000 | -3.305802000000 | 2.273202000000  |
| H | -5.385308000000 | -3.564696000000 | 1.321220000000  |
| H | -5.404907000000 | -2.458067000000 | 2.687697000000  |
| C | 8.374968000000  | -1.647497000000 | 0.786478000000  |
| H | 9.047974000000  | -2.112457000000 | 1.507463000000  |
| H | 8.834407000000  | -0.729516000000 | 0.399129000000  |
| H | 8.190921000000  | -2.343707000000 | -0.041321000000 |
| O | 0.451480000000  | 3.672785000000  | 1.075275000000  |
| O | 2.206221000000  | 3.597930000000  | -0.287793000000 |
| O | -2.332261000000 | 2.502541000000  | 1.430615000000  |
| O | -2.031005000000 | 3.265380000000  | -0.640480000000 |
| C | 1.088124000000  | 3.072144000000  | 0.236454000000  |
| C | -1.730391000000 | 2.478868000000  | 0.224592000000  |
| H | 2.668224000000  | 2.931969000000  | -0.831846000000 |
| H | -1.916519000000 | 1.865833000000  | 2.030584000000  |

Excited State:

HB:

|   |                 |                 |                 |
|---|-----------------|-----------------|-----------------|
| S | 0.524772000000  | 3.963719000000  | -0.080292000000 |
| O | -2.912724000000 | 1.236206000000  | -0.325406000000 |
| O | 6.501862000000  | -1.549050000000 | -0.129886000000 |
| N | 1.527062000000  | 2.610280000000  | -0.080459000000 |

|   |                 |                 |                 |
|---|-----------------|-----------------|-----------------|
| O | -7.205644000000 | -2.035569000000 | 0.789386000000  |
| N | -0.955907000000 | 3.179354000000  | -0.169371000000 |
| C | 0.731738000000  | 1.544744000000  | -0.147379000000 |
| C | -0.666064000000 | 1.877499000000  | -0.195794000000 |
| C | 1.151719000000  | 0.164489000000  | -0.203836000000 |
| C | 0.114196000000  | -0.819504000000 | -0.281123000000 |
| H | 0.384853000000  | -1.866381000000 | -0.291223000000 |
| C | -1.632504000000 | 0.845505000000  | -0.257450000000 |
| C | -1.220296000000 | -0.507399000000 | -0.300103000000 |
| H | -1.963845000000 | -1.291279000000 | -0.361542000000 |
| C | 2.535125000000  | -0.254391000000 | -0.190798000000 |
| C | 3.574738000000  | 0.603833000000  | 0.235504000000  |
| H | 3.323800000000  | 1.614752000000  | 0.524314000000  |
| C | -3.957759000000 | 0.365008000000  | -0.063007000000 |
| C | 2.904867000000  | -1.557953000000 | -0.609917000000 |
| H | 2.156634000000  | -2.233414000000 | -1.006266000000 |
| C | -4.998893000000 | 0.325191000000  | -0.974312000000 |
| H | -4.935275000000 | 0.920058000000  | -1.878556000000 |
| C | -6.172502000000 | -1.225687000000 | 0.448834000000  |
| C | -6.110868000000 | -0.472662000000 | -0.723672000000 |
| H | -6.915825000000 | -0.496255000000 | -1.447059000000 |
| C | 4.213470000000  | -1.994338000000 | -0.587976000000 |
| C | 5.203710000000  | -1.115389000000 | -0.115148000000 |
| C | 4.896690000000  | 0.191221000000  | 0.286655000000  |
| C | -5.119652000000 | -1.165244000000 | 1.367963000000  |
| H | -5.195043000000 | -1.744858000000 | 2.281244000000  |
| C | -4.016224000000 | -0.370144000000 | 1.119981000000  |
| H | -3.209682000000 | -0.304883000000 | 1.842014000000  |
| C | 7.018975000000  | -1.979182000000 | 1.126215000000  |
| H | 8.040057000000  | -2.313603000000 | 0.940367000000  |
| H | 6.429701000000  | -2.811149000000 | 1.527324000000  |
| H | 7.031491000000  | -1.163718000000 | 1.855817000000  |
| C | 4.599630000000  | -3.364875000000 | -1.073390000000 |
| H | 5.339695000000  | -3.303264000000 | -1.876370000000 |
| H | 3.726266000000  | -3.903550000000 | -1.448301000000 |
| H | 5.048515000000  | -3.963480000000 | -0.274241000000 |
| C | 5.979039000000  | 1.135397000000  | 0.737565000000  |
| H | 5.680164000000  | 2.171286000000  | 0.562268000000  |
| H | 6.912452000000  | 0.944297000000  | 0.202785000000  |
| H | 6.185062000000  | 1.032541000000  | 1.809019000000  |
| C | -8.307186000000 | -2.122686000000 | -0.094435000000 |
| H | -9.010795000000 | -2.814184000000 | 0.368631000000  |
| H | -8.005353000000 | -2.514007000000 | -1.072639000000 |
| H | -8.790978000000 | -1.148432000000 | -0.227595000000 |

FB:

|   |                 |                 |                 |
|---|-----------------|-----------------|-----------------|
| S | 0.407127000000  | 3.960504000000  | 0.338421000000  |
| O | -2.882826000000 | 1.148213000000  | -0.537777000000 |
| O | 6.697162000000  | -1.029122000000 | 0.116629000000  |
| N | 1.461615000000  | 2.650988000000  | 0.290543000000  |
| O | -7.182212000000 | -1.880957000000 | 1.092730000000  |
| N | -1.021451000000 | 3.141174000000  | 0.023612000000  |
| C | 0.726762000000  | 1.573123000000  | 0.035369000000  |
| C | -0.677947000000 | 1.862563000000  | -0.112292000000 |
| C | 1.234538000000  | 0.233478000000  | -0.144517000000 |
| C | 0.245508000000  | -0.761091000000 | -0.410676000000 |
| C | -1.598424000000 | 0.817425000000  | -0.361700000000 |
| C | -1.094571000000 | -0.494433000000 | -0.524828000000 |
| C | 2.639562000000  | -0.099243000000 | -0.070471000000 |
| C | 3.533043000000  | 0.695504000000  | 0.684751000000  |
| H | 3.149151000000  | 1.567498000000  | 1.194663000000  |
| C | -3.928658000000 | 0.335835000000  | -0.136729000000 |
| C | 3.181730000000  | -1.209754000000 | -0.766326000000 |
| H | 2.542259000000  | -1.816606000000 | -1.391116000000 |
| C | -5.092556000000 | 0.413478000000  | -0.883939000000 |
| H | -5.115870000000 | 1.046502000000  | -1.763760000000 |
| C | -6.154349000000 | -1.126273000000 | 0.634158000000  |
| C | -6.209744000000 | -0.320916000000 | -0.504169000000 |
| H | -7.110778000000 | -0.255644000000 | -1.100287000000 |
| C | 4.524497000000  | -1.521125000000 | -0.706219000000 |
| C | 5.364468000000  | -0.724816000000 | 0.092442000000  |
| C | 4.880437000000  | 0.393840000000  | 0.785474000000  |
| C | -4.977008000000 | -1.180029000000 | 1.389198000000  |
| H | -4.961431000000 | -1.796601000000 | 2.280894000000  |
| C | -3.866573000000 | -0.451017000000 | 1.011999000000  |
| H | -2.963771000000 | -0.474650000000 | 1.612389000000  |
| C | 7.147638000000  | -1.737785000000 | 1.268478000000  |
| H | 8.212506000000  | -1.918961000000 | 1.120299000000  |
| H | 6.624398000000  | -2.695110000000 | 1.367077000000  |
| H | 7.002548000000  | -1.152900000000 | 2.181734000000  |
| C | 5.102838000000  | -2.671754000000 | -1.483528000000 |
| H | 5.902759000000  | -2.334002000000 | -2.148585000000 |
| H | 4.332102000000  | -3.157118000000 | -2.086391000000 |
| H | 5.538669000000  | -3.426394000000 | -0.820873000000 |
| C | 5.805725000000  | 1.262861000000  | 1.594551000000  |
| H | 5.412701000000  | 2.279680000000  | 1.663679000000  |
| H | 6.799675000000  | 1.301465000000  | 1.142584000000  |
| H | 5.922151000000  | 0.887543000000  | 2.617580000000  |
| C | -8.404371000000 | -1.853965000000 | 0.379441000000  |
| H | -9.080483000000 | -2.519289000000 | 0.915859000000  |
| H | -8.276315000000 | -2.217462000000 | -0.646398000000 |
| H | -8.831092000000 | -0.844898000000 | 0.356289000000  |



|   |                 |                 |                 |
|---|-----------------|-----------------|-----------------|
| F | -1.925773000000 | -1.500414000000 | -0.811862000000 |
| F | 0.592862000000  | -2.049302000000 | -0.538446000000 |

CB:

|   |                 |                 |                 |
|---|-----------------|-----------------|-----------------|
| S | -0.621806000000 | 2.917509000000  | 0.328505000000  |
| O | -2.921672000000 | -0.457030000000 | -1.513296000000 |
| O | 6.697653000000  | -0.135595000000 | 0.742627000000  |
| N | 0.729870000000  | 1.938307000000  | 0.271085000000  |
| O | -7.016924000000 | 0.148772000000  | 1.954737000000  |
| N | -1.741246000000 | 1.850693000000  | -0.322409000000 |
| C | 0.352699000000  | 0.778895000000  | -0.245219000000 |
| C | -1.053170000000 | 0.739281000000  | -0.589777000000 |
| C | 1.191742000000  | -0.361406000000 | -0.479986000000 |
| C | 0.592271000000  | -1.504629000000 | -1.010932000000 |
| C | -1.577844000000 | -0.441332000000 | -1.114449000000 |
| C | -0.790564000000 | -1.568810000000 | -1.347524000000 |
| C | 2.637651000000  | -0.303389000000 | -0.163674000000 |
| C | 3.077763000000  | 0.163432000000  | 1.078218000000  |
| H | 2.350739000000  | 0.504671000000  | 1.806522000000  |
| C | -3.878387000000 | -0.312231000000 | -0.624667000000 |
| C | 3.590740000000  | -0.697029000000 | -1.103232000000 |
| H | 3.270672000000  | -1.020599000000 | -2.088834000000 |
| C | -5.187976000000 | -0.165106000000 | -1.163676000000 |
| H | -5.295119000000 | -0.174713000000 | -2.240994000000 |
| C | -6.055497000000 | -0.002484000000 | 1.068616000000  |
| C | -6.260367000000 | -0.008271000000 | -0.336848000000 |
| H | -7.251903000000 | 0.111184000000  | -0.751308000000 |
| C | 4.954233000000  | -0.663966000000 | -0.821764000000 |
| C | 5.353428000000  | -0.220493000000 | 0.440186000000  |
| C | 4.428950000000  | 0.209133000000  | 1.397743000000  |
| C | -4.752667000000 | -0.169399000000 | 1.606618000000  |
| H | -4.645225000000 | -0.168660000000 | 2.684024000000  |
| C | -3.677596000000 | -0.318159000000 | 0.783470000000  |
| H | -2.682828000000 | -0.448628000000 | 1.182038000000  |
| C | 7.266045000000  | -1.344622000000 | 1.224078000000  |
| H | 8.311972000000  | -1.131119000000 | 1.451041000000  |
| H | 7.215425000000  | -2.139902000000 | 0.472109000000  |
| H | 6.760737000000  | -1.687225000000 | 2.134622000000  |
| C | 5.968696000000  | -1.074471000000 | -1.855469000000 |
| H | 6.879414000000  | -0.477427000000 | -1.767886000000 |
| H | 5.564978000000  | -0.953599000000 | -2.863919000000 |
| H | 6.254048000000  | -2.127031000000 | -1.744448000000 |
| C | 4.902647000000  | 0.724849000000  | 2.730243000000  |
| H | 4.066743000000  | 1.125664000000  | 3.308587000000  |
| H | 5.647324000000  | 1.515602000000  | 2.603097000000  |
| H | 5.375373000000  | -0.062923000000 | 3.326768000000  |

|   |                 |                 |                 |
|---|-----------------|-----------------|-----------------|
| C | -8.375935000000 | 0.329035000000  | 1.536557000000  |
| H | -8.946924000000 | 0.433246000000  | 2.455848000000  |
| H | -8.720271000000 | -0.544574000000 | 0.979297000000  |
| H | -8.469582000000 | 1.234085000000  | 0.932981000000  |
| C | -1.381830000000 | -2.746889000000 | -1.875141000000 |
| C | 1.350413000000  | -2.708819000000 | -1.194418000000 |
| N | -1.901222000000 | -3.691575000000 | -2.303175000000 |
| N | 1.921802000000  | -3.704040000000 | -1.343322000000 |

NB:

|   |                 |                 |                 |
|---|-----------------|-----------------|-----------------|
| S | -0.340877000000 | 3.420459000000  | -1.236339000000 |
| O | -2.857146000000 | -0.221309000000 | -1.343761000000 |
| O | 6.781531000000  | 0.705715000000  | 0.630327000000  |
| N | 0.938679000000  | 2.460315000000  | -0.813733000000 |
| O | -7.184159000000 | 0.515864000000  | 1.787296000000  |
| N | -1.528827000000 | 2.263624000000  | -1.278966000000 |
| C | 0.482654000000  | 1.232910000000  | -0.692015000000 |
| C | -0.934646000000 | 1.116082000000  | -0.959322000000 |
| C | 1.265164000000  | 0.065670000000  | -0.364030000000 |
| C | 0.591956000000  | -1.119995000000 | -0.285124000000 |
| C | -1.547886000000 | -0.137582000000 | -0.859502000000 |
| C | -0.819988000000 | -1.284050000000 | -0.492388000000 |
| C | 2.722443000000  | 0.207785000000  | -0.105298000000 |
| C | 3.163507000000  | 1.026080000000  | 0.936272000000  |
| H | 2.436973000000  | 1.549060000000  | 1.549993000000  |
| C | -3.871634000000 | -0.037053000000 | -0.540067000000 |
| C | 3.663578000000  | -0.430483000000 | -0.909201000000 |
| H | 3.331101000000  | -1.045030000000 | -1.738710000000 |
| C | -5.155486000000 | -0.136770000000 | -1.147869000000 |
| H | -5.197338000000 | -0.360369000000 | -2.206162000000 |
| C | -6.163052000000 | 0.328712000000  | 0.979120000000  |
| C | -6.284806000000 | 0.040597000000  | -0.405373000000 |
| H | -7.257964000000 | -0.040624000000 | -0.869519000000 |
| C | 5.030433000000  | -0.289681000000 | -0.675374000000 |
| C | 5.436225000000  | 0.512218000000  | 0.392306000000  |
| C | 4.517076000000  | 1.187950000000  | 1.202173000000  |
| C | -4.881849000000 | 0.432198000000  | 1.585628000000  |
| H | -4.839545000000 | 0.648963000000  | 2.645603000000  |
| C | -3.753536000000 | 0.250199000000  | 0.848081000000  |
| H | -2.773096000000 | 0.311219000000  | 1.297022000000  |
| C | 7.384999000000  | -0.298012000000 | 1.434307000000  |
| H | 8.427698000000  | -0.005939000000 | 1.569726000000  |
| H | 7.345558000000  | -1.279177000000 | 0.948506000000  |
| H | 6.898621000000  | -0.369082000000 | 2.414062000000  |
| C | 6.040244000000  | -0.970251000000 | -1.560127000000 |
| H | 6.942794000000  | -0.363110000000 | -1.660690000000 |

|   |                 |                 |                 |
|---|-----------------|-----------------|-----------------|
| H | 5.624769000000  | -1.150506000000 | -2.554765000000 |
| H | 6.341403000000  | -1.942520000000 | -1.153284000000 |
| C | 4.998466000000  | 2.078523000000  | 2.315779000000  |
| H | 4.162495000000  | 2.615093000000  | 2.770888000000  |
| H | 5.722420000000  | 2.810996000000  | 1.947935000000  |
| H | 5.498164000000  | 1.506832000000  | 3.105045000000  |
| C | -8.529002000000 | 0.426536000000  | 1.299415000000  |
| H | -9.160294000000 | 0.618449000000  | 2.163485000000  |
| H | -8.723897000000 | -0.573989000000 | 0.908293000000  |
| H | -8.704820000000 | 1.182950000000  | 0.531917000000  |
| N | 1.398150000000  | -2.292312000000 | 0.113634000000  |
| N | -1.455715000000 | -2.497714000000 | -0.210808000000 |
| O | -0.772069000000 | -3.530717000000 | -0.088619000000 |
| O | -2.702720000000 | -2.502466000000 | -0.086925000000 |
| O | 1.528140000000  | -2.483515000000 | 1.308165000000  |
| O | 1.929400000000  | -2.932002000000 | -0.774377000000 |

CAB:

|   |                 |                 |                 |
|---|-----------------|-----------------|-----------------|
| S | 0.941136000000  | -2.948260000000 | -1.077315000000 |
| O | 2.797119000000  | 1.154496000000  | -0.650097000000 |
| O | -6.629709000000 | -1.466788000000 | 0.115969000000  |
| N | -0.521931000000 | -2.214879000000 | -0.709480000000 |
| O | 7.303256000000  | -1.469475000000 | 1.116050000000  |
| N | 1.927219000000  | -1.601323000000 | -0.959814000000 |
| C | -0.262297000000 | -0.936258000000 | -0.472866000000 |
| C | 1.127232000000  | -0.592834000000 | -0.617025000000 |
| C | -1.249779000000 | 0.076507000000  | -0.214649000000 |
| C | -0.783030000000 | 1.419075000000  | -0.037366000000 |
| C | 1.519656000000  | 0.751138000000  | -0.440566000000 |
| C | 0.564351000000  | 1.759399000000  | -0.131518000000 |
| C | -2.651299000000 | -0.292248000000 | -0.130764000000 |
| C | -3.032059000000 | -1.514578000000 | 0.476984000000  |
| H | -2.266219000000 | -2.154042000000 | 0.893126000000  |
| C | 3.905415000000  | 0.435429000000  | -0.214549000000 |
| C | -3.674323000000 | 0.515231000000  | -0.679938000000 |
| H | -3.411217000000 | 1.415601000000  | -1.219408000000 |
| C | 5.051581000000  | 0.542298000000  | -0.982060000000 |
| H | 5.025642000000  | 1.109800000000  | -1.905667000000 |
| C | 6.225244000000  | -0.818461000000 | 0.620586000000  |
| C | 6.219340000000  | -0.087852000000 | -0.568295000000 |
| H | 7.109239000000  | -0.002705000000 | -1.178330000000 |
| C | -5.006276000000 | 0.155123000000  | -0.617646000000 |
| C | -5.338936000000 | -1.044004000000 | 0.043034000000  |
| C | -4.353969000000 | -1.893424000000 | 0.580237000000  |
| C | 5.058058000000  | -0.903557000000 | 1.390934000000  |
| H | 5.090110000000  | -1.464850000000 | 2.317890000000  |

|   |                 |                 |                 |
|---|-----------------|-----------------|-----------------|
| C | 3.898526000000  | -0.278915000000 | 0.980034000000  |
| H | 2.997902000000  | -0.336085000000 | 1.580161000000  |
| C | -7.488848000000 | -0.767704000000 | 1.017392000000  |
| H | -8.463476000000 | -1.249114000000 | 0.939974000000  |
| H | -7.582570000000 | 0.288282000000  | 0.752838000000  |
| H | -7.117568000000 | -0.853792000000 | 2.043702000000  |
| C | -6.059876000000 | 0.995577000000  | -1.286616000000 |
| H | -6.877703000000 | 0.375309000000  | -1.661006000000 |
| H | -5.630336000000 | 1.548443000000  | -2.124927000000 |
| H | -6.486204000000 | 1.733263000000  | -0.597907000000 |
| C | -4.759564000000 | -3.179135000000 | 1.245830000000  |
| H | -3.881628000000 | -3.722268000000 | 1.601605000000  |
| H | -5.306843000000 | -3.823362000000 | 0.551625000000  |
| H | -5.420349000000 | -2.998341000000 | 2.099382000000  |
| C | 8.514363000000  | -1.418770000000 | 0.384133000000  |
| H | 9.234877000000  | -2.004083000000 | 0.954686000000  |
| H | 8.878325000000  | -0.389864000000 | 0.286559000000  |
| H | 8.396270000000  | -1.858986000000 | -0.612175000000 |
| O | 0.223797000000  | 3.851016000000  | 0.916694000000  |
| O | 2.126961000000  | 3.633852000000  | -0.176043000000 |
| O | -2.317745000000 | 2.520214000000  | 1.486294000000  |
| O | -2.196703000000 | 3.256610000000  | -0.598839000000 |
| C | 0.954285000000  | 3.156881000000  | 0.245503000000  |
| C | -1.789250000000 | 2.512835000000  | 0.254998000000  |
| H | 2.632401000000  | 2.934834000000  | -0.632365000000 |
| H | -1.802935000000 | 1.947617000000  | 2.077277000000  |

CLUSTER:

GROUND STATE:

HB:

|   |                 |                 |                 |
|---|-----------------|-----------------|-----------------|
| S | -0.294540000000 | 0.728179000000  | -3.499401000000 |
| S | 0.542586000000  | -0.757611000000 | 3.421548000000  |
| O | 3.290282000000  | -0.934385000000 | -1.602968000000 |
| O | -3.092177000000 | 0.880428000000  | 1.693204000000  |
| O | 2.288114000000  | 7.128863000000  | 0.976961000000  |
| O | -2.347908000000 | -7.119415000000 | -0.951491000000 |
| N | -1.237322000000 | -0.152058000000 | -2.481004000000 |
| N | 1.439187000000  | 0.145393000000  | 2.433117000000  |
| O | -2.192047000000 | 5.192752000000  | -1.026560000000 |
| O | 2.132254000000  | -5.183304000000 | 1.052029000000  |
| N | 1.194060000000  | 0.246949000000  | -2.999851000000 |
| N | -0.941890000000 | -0.313490000000 | 2.973190000000  |
| C | -0.412020000000 | -0.863473000000 | -1.702930000000 |
| C | 0.584896000000  | 0.865630000000  | 1.677871000000  |
| C | 0.989305000000  | -0.612843000000 | -2.000697000000 |
| C | -0.785937000000 | 0.583587000000  | 1.988543000000  |

|   |                 |                 |                 |
|---|-----------------|-----------------|-----------------|
| C | -0.797797000000 | -1.797820000000 | -0.677121000000 |
| C | 0.930669000000  | 1.807016000000  | 0.659974000000  |
| C | 0.248133000000  | -2.341081000000 | 0.041525000000  |
| C | -0.131180000000 | 2.351210000000  | -0.018697000000 |
| H | 0.021075000000  | -3.055032000000 | 0.827018000000  |
| H | 0.054475000000  | 2.946911000000  | -0.708302000000 |
| C | 2.019159000000  | -1.247507000000 | -1.230808000000 |
| C | -1.840939000000 | 1.218599000000  | 1.269370000000  |
| C | 1.626067000000  | -2.064780000000 | -0.199936000000 |
| C | -1.497909000000 | 2.066122000000  | 0.260215000000  |
| H | 2.369959000000  | -2.533230000000 | 0.432732000000  |
| H | -2.164302000000 | 2.462332000000  | -0.252721000000 |
| C | -2.204140000000 | -2.194804000000 | -0.439055000000 |
| C | 2.332061000000  | 2.199874000000  | 0.383118000000  |
| C | -3.125037000000 | -2.284754000000 | -1.495461000000 |
| C | 3.246278000000  | 2.396787000000  | 1.416348000000  |
| H | -2.823134000000 | -1.992859000000 | -2.493533000000 |
| H | 2.986828000000  | 2.221430000000  | 2.291787000000  |
| C | 4.408747000000  | -1.524450000000 | -1.028338000000 |
| C | -4.210338000000 | 1.462654000000  | 1.085490000000  |
| C | -2.641605000000 | -2.556665000000 | 0.844057000000  |
| C | 2.756840000000  | 2.422632000000  | -0.921359000000 |
| H | -1.963090000000 | -2.464440000000 | 1.686915000000  |
| H | 2.159273000000  | 2.278971000000  | -1.619344000000 |
| C | 5.424903000000  | -0.660565000000 | -0.638418000000 |
| C | -5.105007000000 | 0.619516000000  | 0.483375000000  |
| H | 5.270610000000  | 0.405378000000  | -0.735869000000 |
| H | -4.920753000000 | -0.290025000000 | 0.426883000000  |
| C | 1.544387000000  | 4.155641000000  | 4.806534000000  |
| C | -1.604068000000 | -4.146191000000 | -4.781151000000 |
| C | 6.633841000000  | -1.157420000000 | -0.152715000000 |
| C | -6.288778000000 | 1.123416000000  | -0.043040000000 |
| H | 7.409239000000  | -0.459235000000 | 0.138719000000  |
| H | -6.903619000000 | 0.552111000000  | -0.444448000000 |
| C | -3.939824000000 | -3.010739000000 | 1.085567000000  |
| C | 4.044895000000  | 2.851860000000  | -1.217043000000 |
| C | -4.820979000000 | -3.109248000000 | -0.002982000000 |
| C | 4.913344000000  | 3.093559000000  | -0.153313000000 |
| C | -4.427815000000 | -2.743417000000 | -1.299669000000 |
| C | 4.541449000000  | 2.851015000000  | 1.168346000000  |
| C | 0.631132000000  | 3.316375000000  | 4.196012000000  |
| C | -0.690861000000 | -3.306857000000 | -4.170573000000 |
| H | 0.802475000000  | 2.402786000000  | 4.147218000000  |
| H | -0.862220000000 | -2.393406000000 | -4.121804000000 |
| C | -0.532789000000 | 3.826803000000  | 3.659277000000  |
| C | 0.472996000000  | -3.817355000000 | -3.633808000000 |

|   |                 |                 |                 |
|---|-----------------|-----------------|-----------------|
| H | -1.138618000000 | 3.263470000000  | 3.235132000000  |
| H | 1.078873000000  | -3.254089000000 | -3.209717000000 |
| C | 2.187202000000  | 5.721141000000  | 1.150297000000  |
| C | -2.246996000000 | -5.711693000000 | -1.124828000000 |
| H | 1.273746000000  | 5.485083000000  | 1.329678000000  |
| H | -1.333540000000 | -5.475634000000 | -1.304209000000 |
| H | 2.739128000000  | 5.449260000000  | 1.887806000000  |
| H | -2.798874000000 | -5.439879000000 | -1.862392000000 |
| H | 2.481514000000  | 5.278103000000  | 0.350335000000  |
| H | -2.541195000000 | -5.268652000000 | -0.324951000000 |
| C | -4.392176000000 | -3.359802000000 | 2.482655000000  |
| C | 4.498323000000  | 2.989461000000  | -2.648960000000 |
| H | 3.087522000000  | 7.349243000000  | 3.225681000000  |
| H | -3.147267000000 | -7.339863000000 | -3.200266000000 |
| H | -3.747741000000 | -2.885784000000 | 3.229689000000  |
| H | 4.437350000000  | 2.138442000000  | -3.087589000000 |
| H | -4.359359000000 | -4.442755000000 | 2.663897000000  |
| H | 3.937646000000  | 3.624168000000  | -3.102215000000 |
| C | -5.396920000000 | -2.839294000000 | -2.453075000000 |
| C | 5.499685000000  | 3.074508000000  | 2.311982000000  |
| H | -4.995154000000 | -2.338215000000 | -3.338754000000 |
| H | 5.066539000000  | 2.852238000000  | 3.139746000000  |
| H | -6.359878000000 | -2.384517000000 | -2.199514000000 |
| H | 6.273079000000  | 2.517759000000  | 2.195503000000  |
| H | -5.599021000000 | -3.882950000000 | -2.728264000000 |
| H | 5.768166000000  | 3.996877000000  | 2.328917000000  |
| C | -1.286753000000 | 5.985841000000  | -0.285367000000 |
| C | 1.227008000000  | -5.976460000000 | 0.310781000000  |
| H | -0.547810000000 | 5.443892000000  | 0.001650000000  |
| H | 0.488081000000  | -5.434374000000 | 0.023789000000  |
| H | -1.734303000000 | 6.349740000000  | 0.481418000000  |
| H | 1.674573000000  | -6.340221000000 | -0.455980000000 |
| H | -0.963167000000 | 6.701550000000  | -0.837207000000 |
| H | 0.903373000000  | -6.692102000000 | 0.862676000000  |
| C | 3.581772000000  | 7.552006000000  | 0.710151000000  |
| C | -3.641517000000 | -7.542626000000 | -0.684736000000 |
| C | -3.312973000000 | 5.808359000000  | -1.518095000000 |
| C | 3.253292000000  | -5.798909000000 | 1.543479000000  |
| C | 4.596862000000  | -2.908730000000 | -0.945429000000 |
| C | -4.467881000000 | 2.808725000000  | 1.181770000000  |
| C | 1.288048000000  | 5.512133000000  | 4.884009000000  |
| O | 2.665313000000  | 3.540034000000  | 5.298070000000  |
| O | -2.725106000000 | -3.530586000000 | -5.272601000000 |
| C | -1.347842000000 | -5.502684000000 | -4.858539000000 |
| C | 6.824592000000  | -2.539467000000 | -0.052094000000 |
| C | -6.544993000000 | 2.479957000000  | 0.034482000000  |

|   |                 |                 |                 |
|---|-----------------|-----------------|-----------------|
| O | -6.136575000000 | -3.490351000000 | 0.210528000000  |
| O | 6.207061000000  | 3.516682000000  | -0.420045000000 |
| C | -0.790316000000 | 5.173013000000  | 3.755581000000  |
| C | 0.730587000000  | -5.163494000000 | -3.730142000000 |
| H | -5.422874000000 | -3.035069000000 | 2.653441000000  |
| H | 5.407653000000  | 3.296302000000  | -2.668765000000 |
| C | 3.953775000000  | 7.794462000000  | -0.611485000000 |
| C | 4.450221000000  | 7.793706000000  | 1.773881000000  |
| C | -4.510014000000 | -7.784257000000 | -1.748412000000 |
| C | -4.013456000000 | -7.785012000000 | 0.636869000000  |
| C | -4.226228000000 | 4.969093000000  | -2.128618000000 |
| C | -3.569312000000 | 7.164851000000  | -1.440621000000 |
| C | 3.509518000000  | -7.155402000000 | 1.466090000000  |
| C | 4.166499000000  | -4.959574000000 | 2.154057000000  |
| H | 3.814576000000  | -3.587195000000 | -1.266966000000 |
| C | 5.797245000000  | -3.407623000000 | -0.450668000000 |
| C | -5.631738000000 | 3.319223000000  | 0.645004000000  |
| H | -3.862052000000 | 3.372059000000  | 1.605915000000  |
| C | 0.104277000000  | 6.016033000000  | 4.357594000000  |
| H | 1.902953000000  | 6.083508000000  | 5.285386000000  |
| C | 3.570607000000  | 4.333123000000  | 6.039263000000  |
| C | -3.630352000000 | -4.323743000000 | -6.013848000000 |
| H | -1.962683000000 | -6.073989000000 | -5.259948000000 |
| C | -0.164022000000 | -6.006653000000 | -4.332180000000 |
| O | 7.964900000000  | -3.128346000000 | 0.413193000000  |
| O | -7.665983000000 | 3.095494000000  | -0.457023000000 |
| C | -6.361964000000 | -4.896291000000 | 0.178685000000  |
| C | 6.307973000000  | 4.924404000000  | -0.593381000000 |
| O | -1.908494000000 | 5.755101000000  | 3.147843000000  |
| O | 1.848749000000  | -5.745720000000 | -3.122428000000 |
| C | 2.995490000000  | 7.571037000000  | -1.755066000000 |
| C | 5.248897000000  | 8.248758000000  | -0.859433000000 |
| C | 5.738336000000  | 8.222913000000  | 1.478274000000  |
| C | 3.996793000000  | 7.656104000000  | 3.205798000000  |
| C | -4.056538000000 | -7.646724000000 | -3.180384000000 |
| C | -5.798081000000 | -8.213533000000 | -1.452860000000 |
| C | -5.308578000000 | -8.239308000000 | 0.884816000000  |
| C | -3.055171000000 | -7.561587000000 | 1.780450000000  |
| C | -5.390150000000 | 5.479521000000  | -2.665352000000 |
| H | -4.054885000000 | 4.055504000000  | -2.177411000000 |
| C | -4.753083000000 | 7.668751000000  | -1.967035000000 |
| H | -2.954407000000 | 7.736226000000  | -1.039243000000 |
| H | 2.894678000000  | -7.726707000000 | 1.064682000000  |
| C | 4.693338000000  | -7.659370000000 | 1.992450000000  |
| H | 3.995140000000  | -4.046123000000 | 2.202826000000  |
| C | 5.330356000000  | -5.470072000000 | 2.690822000000  |

|   |                 |                 |                 |
|---|-----------------|-----------------|-----------------|
| H | 5.963617000000  | -4.476064000000 | -0.367633000000 |
| H | -5.803205000000 | 4.232763000000  | 0.693751000000  |
| H | -0.079977000000 | 6.925573000000  | 4.414086000000  |
| H | 3.894194000000  | 5.048833000000  | 5.487423000000  |
| H | 4.309550000000  | 3.791174000000  | 6.326280000000  |
| H | 3.123058000000  | 4.697022000000  | 6.806048000000  |
| H | -4.369279000000 | -3.781656000000 | -6.300841000000 |
| H | -3.182787000000 | -4.687503000000 | -6.780610000000 |
| H | -3.953987000000 | -5.039384000000 | -5.461953000000 |
| H | 0.020232000000  | -6.916193000000 | -4.388672000000 |
| C | 9.025769000000  | -2.278808000000 | 0.821184000000  |
| C | -8.571337000000 | 2.302426000000  | -1.198294000000 |
| H | -6.046030000000 | -5.330483000000 | -0.778336000000 |
| H | -7.437338000000 | -5.045534000000 | 0.303772000000  |
| H | -5.831625000000 | -5.406008000000 | 0.992663000000  |
| H | 5.756095000000  | 5.196217000000  | -1.330945000000 |
| H | 7.221429000000  | 5.160462000000  | -0.772762000000 |
| H | 6.013661000000  | 5.367442000000  | 0.206581000000  |
| C | -3.159731000000 | 5.416929000000  | 3.571677000000  |
| C | 3.099938000000  | -5.407481000000 | -3.546207000000 |
| H | 3.428636000000  | 7.793307000000  | -2.582830000000 |
| H | 2.222097000000  | 8.127787000000  | -1.638587000000 |
| H | 2.727010000000  | 6.648668000000  | -1.772001000000 |
| H | 5.508288000000  | 8.424136000000  | -1.734949000000 |
| C | 6.163115000000  | 8.445671000000  | 0.173797000000  |
| H | 6.335902000000  | 8.366574000000  | 2.176260000000  |
| H | 4.057825000000  | 8.507103000000  | 3.644505000000  |
| H | 4.557577000000  | 7.021309000000  | 3.659076000000  |
| H | -4.617259000000 | -7.011859000000 | -3.633692000000 |
| H | -4.117619000000 | -8.497655000000 | -3.619035000000 |
| H | -6.395648000000 | -8.357194000000 | -2.150846000000 |
| C | -6.222844000000 | -8.436152000000 | -0.148359000000 |
| H | -5.568081000000 | -8.414687000000 | 1.760418000000  |
| H | -2.281826000000 | -8.118268000000 | 1.664026000000  |
| H | -2.786739000000 | -6.639150000000 | 1.797439000000  |
| H | -3.488381000000 | -7.783927000000 | 2.608245000000  |
| H | -5.995978000000 | 4.916187000000  | -3.089498000000 |
| C | -5.647677000000 | 6.825731000000  | -2.569049000000 |
| H | -4.937337000000 | 8.578291000000  | -1.910544000000 |
| C | 5.587947000000  | -6.816212000000 | 2.594487000000  |
| H | 4.877592000000  | -8.568911000000 | 1.935958000000  |
| H | 5.936233000000  | -4.906807000000 | 3.114912000000  |
| H | 9.388698000000  | -1.660321000000 | -0.010367000000 |
| H | 9.830738000000  | -2.933272000000 | 1.157568000000  |
| H | 8.722554000000  | -1.625920000000 | 1.650272000000  |
| H | -9.310204000000 | 2.844492000000  | -1.485209000000 |



|   |                  |                  |                 |
|---|------------------|------------------|-----------------|
| H | -8.123712000000  | 1.938644000000   | -1.964977000000 |
| H | -8.894864000000  | 1.586696000000   | -0.646376000000 |
| C | -4.214733000000  | 6.051941000000   | 2.852503000000  |
| C | -3.502697000000  | 4.569477000000   | 4.580801000000  |
| C | 3.443016000000   | -4.560026000000  | -4.555418000000 |
| C | 4.154940000000   | -6.042492000000  | -2.827034000000 |
| C | 7.564555000000   | 8.838461000000   | -0.103113000000 |
| C | -7.624236000000  | -8.829010000000  | 0.128497000000  |
| O | -6.765854000000  | 7.407818000000   | -3.176787000000 |
| O | 6.706109000000   | -7.398438000000  | 3.202201000000  |
| N | -4.058716000000  | 6.949088000000   | 1.867826000000  |
| C | -5.585566000000  | 5.769898000000   | 3.163176000000  |
| H | -2.836368000000  | 4.173196000000   | 5.093767000000  |
| C | -4.869491000000  | 4.284318000000   | 4.859744000000  |
| C | 4.809745000000   | -4.274938000000  | -4.834329000000 |
| H | 2.776575000000   | -4.163748000000  | -5.068298000000 |
| C | 5.525773000000   | -5.760450000000  | -3.137707000000 |
| N | 3.999035000000   | -6.939638000000  | -1.842442000000 |
| C | 7.910328000000   | 9.779847000000   | -1.121010000000 |
| C | 8.626355000000   | 8.294335000000   | 0.575613000000  |
| C | -8.686085000000  | -8.284816000000  | -0.550174000000 |
| C | -7.970073000000  | -9.770467000000  | 1.146424000000  |
| C | -8.017092000000  | 7.069647000000   | -2.752953000000 |
| C | 7.957298000000   | -7.060199000000  | 2.778422000000  |
| N | -6.439853000000  | 6.490226000000   | 2.407822000000  |
| C | -5.931339000000  | 4.828512000000   | 4.181073000000  |
| H | -5.055081000000  | 3.688687000000   | 5.549318000000  |
| H | 4.995400000000   | -3.679237000000  | -5.523935000000 |
| C | 5.871546000000   | -4.819063000000  | -4.155603000000 |
| N | 6.380124000000   | -6.480707000000  | -2.382383000000 |
| N | 7.055977000000   | 10.500104000000  | -1.876334000000 |
| C | 9.281161000000   | 10.061890000000  | -1.431683000000 |
| C | 9.993085000000   | 8.579424000000   | 0.296701000000  |
| H | 8.440701000000   | 7.698634000000   | 1.265218000000  |
| H | -8.500494000000  | -7.689186000000  | -1.239749000000 |
| C | -10.052830000000 | -8.570043000000  | -0.271287000000 |
| C | -9.340906000000  | -10.052509000000 | 1.457097000000  |
| N | -7.115722000000  | -10.490724000000 | 1.901748000000  |
| C | -9.072093000000  | 7.704659000000   | -3.472126000000 |
| C | -8.360057000000  | 6.222195000000   | -1.743828000000 |
| C | 8.300376000000   | -6.212744000000  | 1.769212000000  |
| C | 9.012300000000   | -7.695210000000  | 3.497596000000  |
| C | -7.332731000000  | 4.435654000000   | 4.457928000000  |
| C | 7.272986000000   | -4.426274000000  | -4.432514000000 |
| N | 9.437066000000   | 10.959035000000  | -2.416274000000 |
| C | 10.336163000000  | 9.426878000000   | -0.712509000000 |

|   |                  |                  |                 |
|---|------------------|------------------|-----------------|
| H | 10.659526000000  | 8.183145000000   | 0.809581000000  |
| H | -10.719207000000 | -8.173694000000  | -0.784198000000 |
| C | -10.395844000000 | -9.417428000000  | 0.737893000000  |
| N | -9.496859000000  | -10.949586000000 | 2.441744000000  |
| N | -8.916076000000  | 8.601806000000   | -4.456804000000 |
| C | -10.442927000000 | 7.422616000000   | -3.161453000000 |
| H | -7.693728000000  | 5.825914000000   | -1.230862000000 |
| C | -9.726851000000  | 5.937036000000   | -1.464886000000 |
| C | 9.667106000000   | -5.927655000000  | 1.490300000000  |
| H | 7.633935000000   | -5.816465000000  | 1.256332000000  |
| C | 10.383133000000  | -7.413167000000  | 3.186923000000  |
| N | 8.856395000000   | -8.592355000000  | 4.482187000000  |
| C | -8.246949000000  | 4.238741000000   | 3.424699000000  |
| C | -7.757558000000  | 4.212965000000   | 5.762461000000  |
| C | 7.697765000000   | -4.203516000000  | -5.736991000000 |
| C | 8.187203000000   | -4.229361000000  | -3.399284000000 |
| O | 11.587352000000  | 9.765118000000   | -1.136288000000 |
| O | -11.647081000000 | -9.755599000000  | 1.161727000000  |
| N | -11.297213000000 | 8.142944000000   | -3.916808000000 |
| C | -10.788759000000 | 6.481250000000   | -2.143635000000 |
| H | -9.912441000000  | 5.341405000000   | -0.775311000000 |
| H | 9.852760000000   | -5.331955000000  | 0.800695000000  |
| C | 10.728965000000  | -6.471802000000  | 2.169104000000  |
| N | 11.237484000000  | -8.133425000000  | 3.942247000000  |
| H | -7.987494000000  | 4.414189000000   | 2.549151000000  |
| C | -9.542119000000  | 3.784513000000   | 3.672701000000  |
| H | -7.159879000000  | 4.356627000000   | 6.460360000000  |
| C | -9.045561000000  | 3.783759000000   | 6.057982000000  |
| C | 8.985880000000   | -3.774309000000  | -6.032598000000 |
| H | 7.100198000000   | -4.347177000000  | -6.434977000000 |
| C | 9.482326000000   | -3.775065000000  | -3.647232000000 |
| H | 7.927813000000   | -4.404739000000  | -2.523768000000 |
| C | 12.705513000000  | 9.182891000000   | -0.528575000000 |
| C | -12.765259000000 | -9.173511000000  | 0.553989000000  |
| C | -12.190091000000 | 6.088372000000   | -1.866701000000 |
| C | 12.130346000000  | -6.078992000000  | 1.892116000000  |
| C | -10.500356000000 | 3.561020000000   | 2.529065000000  |
| C | -9.914010000000  | 3.542060000000   | 4.994251000000  |
| C | -9.499053000000  | 3.646087000000   | 7.489929000000  |
| C | 9.439308000000   | -3.636707000000  | -7.464515000000 |
| C | 9.854329000000   | -3.532609000000  | -4.968868000000 |
| C | 10.440611000000  | -3.551640000000  | -2.503651000000 |
| C | 12.963105000000  | 7.836752000000   | -0.624909000000 |
| C | 13.600123000000  | 10.026050000000  | 0.073463000000  |
| C | -13.659852000000 | -10.016531000000 | -0.048025000000 |
| C | -13.022850000000 | -7.827372000000  | 0.650323000000  |

|   |                  |                  |                 |
|---|------------------|------------------|-----------------|
| C | -13.104309000000 | 5.891459000000   | -2.899931000000 |
| C | -12.614919000000 | 5.865682000000   | -0.562169000000 |
| C | 12.555125000000  | -5.856234000000  | 0.587638000000  |
| C | 13.044564000000  | -5.882079000000  | 2.925346000000  |
| H | -10.067146000000 | 3.783361000000   | 1.701270000000  |
| H | -11.273749000000 | 4.117770000000   | 2.645544000000  |
| H | -10.768836000000 | 2.638651000000   | 2.512130000000  |
| O | -11.207668000000 | 3.118916000000   | 5.261061000000  |
| H | -9.438021000000  | 4.497086000000   | 7.928636000000  |
| H | -10.408259000000 | 3.339296000000   | 7.509781000000  |
| H | -8.938317000000  | 3.011361000000   | 7.943262000000  |
| H | 8.878523000000   | -3.001912000000  | -7.917792000000 |
| H | 10.348578000000  | -3.329846000000  | -7.484397000000 |
| H | 9.378276000000   | -4.487706000000  | -7.903221000000 |
| O | 11.147986000000  | -3.109466000000  | -5.235677000000 |
| H | 11.214004000000  | -4.108389000000  | -2.620129000000 |
| H | 10.709091000000  | -2.629271000000  | -2.486716000000 |
| H | 10.007465000000  | -3.773910000000  | -1.675887000000 |
| H | 12.357228000000  | 7.273487000000   | -1.048999000000 |
| C | 14.126962000000  | 7.326254000000   | -0.088144000000 |
| H | 13.415869000000  | 10.935590000000  | 0.129955000000  |
| C | 14.783942000000  | 9.522082000000   | 0.599823000000  |
| C | -14.843688000000 | -9.512701000000  | -0.574408000000 |
| H | -13.475614000000 | -10.926210000000 | -0.104541000000 |
| C | -14.186707000000 | -7.316874000000  | 0.113558000000  |
| H | -12.416973000000 | -7.264106000000  | 1.074414000000  |
| H | -12.844854000000 | 6.066907000000   | -3.775478000000 |
| C | -14.399480000000 | 5.437231000000   | -2.651929000000 |
| H | -12.017239000000 | 6.009345000000   | 0.135731000000  |
| C | -13.902921000000 | 5.436477000000   | -0.266648000000 |
| C | 13.843240000000  | -5.427026000000  | 0.292032000000  |
| H | 11.957558000000  | -5.999894000000  | -0.110347000000 |
| C | 14.339686000000  | -5.427783000000  | 2.677398000000  |
| H | 12.785173000000  | -6.057456000000  | 3.800862000000  |
| C | -11.308644000000 | 1.711124000000   | 5.434428000000  |
| C | 11.248898000000  | -1.701744000000  | -5.409014000000 |
| C | 15.040169000000  | 8.165588000000   | 0.522434000000  |
| H | 14.298321000000  | 6.412803000000   | -0.136913000000 |
| H | 15.398783000000  | 10.093387000000  | 1.001231000000  |
| H | -15.458528000000 | -10.084006000000 | -0.975817000000 |
| C | -15.099962000000 | -8.156140000000  | -0.496965000000 |
| H | -14.358114000000 | -6.403354000000  | 0.162382000000  |
| C | -15.357716000000 | 5.213738000000   | -3.795565000000 |
| C | -14.771370000000 | 5.194777000000   | -1.330379000000 |
| C | -14.356413000000 | 5.298805000000   | 1.165299000000  |
| C | 14.296668000000  | -5.289425000000  | -1.139885000000 |

|   |                  |                  |                 |
|---|------------------|------------------|-----------------|
| C | 14.711689000000  | -5.185327000000  | 1.355762000000  |
| C | 15.297971000000  | -5.204358000000  | 3.820979000000  |
| H | -11.014332000000 | 1.268086000000   | 4.634466000000  |
| H | -12.222036000000 | 1.475136000000   | 5.613778000000  |
| H | -10.756702000000 | 1.439381000000   | 6.171961000000  |
| H | 10.696972000000  | -1.429862000000  | -6.146523000000 |
| H | 12.162355000000  | -1.465685000000  | -5.588395000000 |
| H | 10.954587000000  | -1.258706000000  | -4.609051000000 |
| O | 16.161207000000  | 7.549983000000   | 1.013884000000  |
| O | -16.220952000000 | -7.540603000000  | -0.988469000000 |
| H | -14.924506000000 | 5.436078000000   | -4.623360000000 |
| H | -16.131109000000 | 5.770487000000   | -3.679086000000 |
| H | -15.626196000000 | 4.291369000000   | -3.812499000000 |
| O | -16.065028000000 | 4.771634000000   | -1.063569000000 |
| H | -14.295381000000 | 6.149804000000   | 1.604006000000  |
| H | -15.265620000000 | 4.992014000000   | 1.185151000000  |
| H | -13.795677000000 | 4.664078000000   | 1.618632000000  |
| H | 13.735883000000  | -4.654630000000  | -1.593163000000 |
| H | 15.205939000000  | -4.982564000000  | -1.159768000000 |
| H | 14.235636000000  | -6.140424000000  | -1.578592000000 |
| O | 16.005347000000  | -4.762184000000  | 1.088952000000  |
| H | 16.071364000000  | -5.761107000000  | 3.704500000000  |
| H | 15.566451000000  | -4.281989000000  | 3.837914000000  |
| H | 14.864825000000  | -5.426628000000  | 4.648743000000  |
| C | 17.066453000000  | 8.343140000000   | 1.755132000000  |
| C | -17.126198000000 | -8.333759000000  | -1.729717000000 |
| C | -16.166004000000 | 3.363842000000   | -0.890201000000 |
| C | 16.106259000000  | -3.354462000000  | 0.915616000000  |
| H | 17.390088000000  | 9.058781000000   | 1.203237000000  |
| H | 17.805380000000  | 7.801053000000   | 2.042124000000  |
| H | 16.618888000000  | 8.706901000000   | 2.521893000000  |
| H | -17.865125000000 | -7.791673000000  | -2.016710000000 |
| H | -16.678633000000 | -8.697520000000  | -2.496478000000 |
| H | -17.449769000000 | -9.049331000000  | -1.177853000000 |
| H | -15.871692000000 | 2.920804000000   | -1.690164000000 |
| H | -17.079396000000 | 3.127854000000   | -0.710851000000 |
| H | -15.614062000000 | 3.092099000000   | -0.152668000000 |
| H | 15.554332000000  | -3.082580000000  | 0.178107000000  |
| H | 17.019715000000  | -3.118403000000  | 0.736235000000  |
| H | 15.811947000000  | -2.911423000000  | 1.715578000000  |
| S | -10.400617000000 | 9.045857000000   | -4.905131000000 |
| S | 7.952589000000   | 11.403156000000  | -2.864632000000 |
| S | -5.543257000000  | 7.393139000000   | 1.419499000000  |
| S | 5.483512000000   | -7.383759000000  | -1.394084000000 |
| S | -8.012318000000  | -11.393637000000 | 2.890071000000  |
| S | 10.340872000000  | -9.036477000000  | 4.930545000000  |

FB:

|   |                 |                 |                 |
|---|-----------------|-----------------|-----------------|
| S | 0.480702000000  | -0.652945000000 | -3.539067000000 |
| S | -0.569769000000 | 0.715321000000  | 3.425703000000  |
| O | -3.099516000000 | 0.886359000000  | -1.502013000000 |
| O | 3.048962000000  | -0.934824000000 | 1.675374000000  |
| O | -2.397826000000 | -7.112651000000 | 0.856575000000  |
| O | 2.394210000000  | 7.112927000000  | -0.844711000000 |
| N | 1.431093000000  | 0.214281000000  | -2.515473000000 |
| N | -1.474997000000 | -0.162374000000 | 2.422448000000  |
| O | 2.105228000000  | -5.194156000000 | -1.112269000000 |
| O | -2.108845000000 | 5.194432000000  | 1.124132000000  |
| N | -1.004134000000 | -0.207016000000 | -2.993968000000 |
| N | 0.910308000000  | 0.262194000000  | 2.971847000000  |
| C | 0.614516000000  | 0.889730000000  | -1.701050000000 |
| C | -0.627716000000 | -0.879947000000 | 1.656840000000  |
| C | -0.790873000000 | 0.629415000000  | -1.979404000000 |
| C | 0.745745000000  | -0.617658000000 | 1.973160000000  |
| C | 1.030954000000  | 1.789317000000  | -0.654409000000 |
| C | -0.982532000000 | -1.801525000000 | 0.624037000000  |
| C | -0.014071000000 | 2.276279000000  | 0.094615000000  |
| C | 0.074115000000  | -2.346531000000 | -0.062061000000 |
| C | -1.826620000000 | 1.211581000000  | -1.175346000000 |
| C | 1.794607000000  | -1.252760000000 | 1.245140000000  |
| C | -1.394693000000 | 1.975035000000  | -0.119996000000 |
| C | 1.443540000000  | -2.080658000000 | 0.222547000000  |
| C | 2.436666000000  | 2.203056000000  | -0.445661000000 |
| C | -2.387786000000 | -2.174805000000 | 0.339769000000  |
| C | 3.292401000000  | 2.385423000000  | -1.543211000000 |
| C | -3.305219000000 | -2.377907000000 | 1.368942000000  |
| H | 2.935697000000  | 2.167983000000  | -2.542295000000 |
| H | -3.044853000000 | -2.219060000000 | 2.247256000000  |
| C | -4.207610000000 | 1.478774000000  | -0.885535000000 |
| C | 4.161428000000  | -1.519574000000 | 1.059683000000  |
| C | 2.939418000000  | 2.468895000000  | 0.837784000000  |
| C | -2.813511000000 | -2.372554000000 | -0.968425000000 |
| H | 2.308100000000  | 2.318289000000  | 1.704849000000  |
| H | -2.213655000000 | -2.224497000000 | -1.663522000000 |
| C | -5.032317000000 | 0.655552000000  | -0.139321000000 |
| C | 5.065831000000  | -0.676882000000 | 0.471649000000  |
| H | -4.743685000000 | -0.370068000000 | 0.007786000000  |
| H | 4.891491000000  | 0.235373000000  | 0.429202000000  |
| C | -1.626199000000 | -4.207811000000 | 4.732824000000  |
| C | 1.622469000000  | 4.208089000000  | -4.721047000000 |
| C | -6.214234000000 | 1.142462000000  | 0.414684000000  |
| C | 6.244660000000  | -1.185299000000 | -0.061468000000 |

|   |                 |                 |                 |
|---|-----------------|-----------------|-----------------|
| H | -6.840678000000 | 0.472737000000  | 0.991217000000  |
| H | 6.866089000000  | -0.614493000000 | -0.453327000000 |
| C | 4.246615000000  | 2.914953000000  | 1.036489000000  |
| C | -4.105808000000 | -2.783132000000 | -1.271982000000 |
| C | 5.065628000000  | 3.102438000000  | -0.088370000000 |
| C | -4.977994000000 | -3.031984000000 | -0.212969000000 |
| C | 4.602110000000  | 2.839602000000  | -1.386756000000 |
| C | -4.604954000000 | -2.814147000000 | 1.112664000000  |
| C | -0.703244000000 | -3.369061000000 | 4.136341000000  |
| C | 0.699561000000  | 3.369269000000  | -4.124510000000 |
| H | -0.864638000000 | -2.453019000000 | 4.101666000000  |
| H | 0.860973000000  | 2.453365000000  | -4.089857000000 |
| C | 0.455678000000  | -3.883629000000 | 3.592785000000  |
| C | -0.459295000000 | 3.883906000000  | -3.580922000000 |
| H | 1.068034000000  | -3.320341000000 | 3.178058000000  |
| H | -1.071699000000 | 3.320686000000  | -3.166249000000 |
| C | -2.281881000000 | -5.708982000000 | 1.051976000000  |
| C | 2.278264000000  | 5.709259000000  | -1.040114000000 |
| H | -1.366122000000 | -5.485665000000 | 1.235876000000  |
| H | 1.362506000000  | 5.485941000000  | -1.224014000000 |
| H | -2.831646000000 | -5.442684000000 | 1.793127000000  |
| H | 2.827982000000  | 5.443029000000  | -1.781319000000 |
| H | -2.570499000000 | -5.250346000000 | 0.258759000000  |
| H | 2.566770000000  | 5.250623000000  | -0.246982000000 |
| C | 4.776155000000  | 3.164048000000  | 2.427711000000  |
| C | -4.559118000000 | -2.893440000000 | -2.706297000000 |
| H | -3.202052000000 | -7.359436000000 | 3.100830000000  |
| H | 3.198388000000  | 7.359782000000  | -3.089020000000 |
| H | 4.140928000000  | 2.681548000000  | 3.176787000000  |
| H | -4.488457000000 | -2.036387000000 | -3.131520000000 |
| H | 4.805986000000  | 4.235651000000  | 2.666335000000  |
| H | -4.004842000000 | -3.527031000000 | -3.168889000000 |
| C | 5.496886000000  | 3.043860000000  | -2.585449000000 |
| C | -5.566813000000 | -3.045071000000 | 2.251774000000  |
| H | 5.107465000000  | 2.507919000000  | -3.456285000000 |
| H | -5.132201000000 | -2.840457000000 | 3.083313000000  |
| H | 6.513831000000  | 2.694712000000  | -2.383298000000 |
| H | -6.334009000000 | -2.478224000000 | 2.143285000000  |
| H | 5.567807000000  | 4.105110000000  | -2.860366000000 |
| H | -5.845277000000 | -3.964629000000 | 2.254046000000  |
| C | 1.190589000000  | -5.988863000000 | -0.384403000000 |
| C | -1.194253000000 | 5.989208000000  | 0.396211000000  |
| H | 0.457236000000  | -5.443486000000 | -0.089644000000 |
| H | -0.460919000000 | 5.443694000000  | 0.101476000000  |
| H | 1.633329000000  | -6.369517000000 | 0.377021000000  |
| H | -1.637010000000 | 6.369724000000  | -0.365191000000 |

|   |                 |                 |                 |
|---|-----------------|-----------------|-----------------|
| H | 0.859887000000  | -6.692322000000 | -0.947659000000 |
| H | -0.863503000000 | 6.692598000000  | 0.959521000000  |
| C | -3.695692000000 | -7.517534000000 | 0.581978000000  |
| C | 3.692027000000  | 7.517880000000  | -0.570169000000 |
| C | 3.219969000000  | -5.814123000000 | -1.612314000000 |
| C | -3.223698000000 | 5.814401000000  | 1.624092000000  |
| C | -4.546173000000 | 2.815156000000  | -1.093668000000 |
| C | 4.404285000000  | -2.869695000000 | 1.135162000000  |
| C | -1.384637000000 | -5.568045000000 | 4.789336000000  |
| O | -2.740940000000 | -3.587843000000 | 5.232870000000  |
| O | 2.737322000000  | 3.588120000000  | -5.221008000000 |
| C | 1.381020000000  | 5.568321000000  | -4.777473000000 |
| C | -6.565286000000 | 2.479546000000  | 0.213285000000  |
| C | 6.486097000000  | -2.545582000000 | -0.004910000000 |
| O | 6.387352000000  | 3.474923000000  | 0.092737000000  |
| O | -6.275918000000 | -3.436848000000 | -0.487487000000 |
| C | 0.698518000000  | -5.233890000000 | 3.668286000000  |
| C | -0.702200000000 | 5.234097000000  | -3.656454000000 |
| H | 5.796143000000  | 2.782453000000  | 2.534447000000  |
| H | -5.471693000000 | -3.190063000000 | -2.731742000000 |
| C | -4.068838000000 | -7.735282000000 | -0.743631000000 |
| C | -4.567878000000 | -7.766387000000 | 1.640991000000  |
| C | 4.564261000000  | 7.766663000000  | -1.629128000000 |
| C | 4.065109000000  | 7.735560000000  | 0.755409000000  |
| C | 4.142924000000  | -4.975373000000 | -2.208798000000 |
| C | 3.461530000000  | -7.174358000000 | -1.555803000000 |
| C | -3.465147000000 | 7.174633000000  | 1.567666000000  |
| C | -4.146606000000 | 4.975580000000  | 2.220629000000  |
| H | -3.892778000000 | 3.454790000000  | -1.675244000000 |
| C | -5.719222000000 | 3.311160000000  | -0.538411000000 |
| C | 5.563142000000  | -3.384332000000 | 0.591573000000  |
| H | 3.791929000000  | -3.432985000000 | 1.549888000000  |
| C | -0.205807000000 | -6.076463000000 | 4.256219000000  |
| H | -2.006130000000 | -6.138921000000 | 5.181163000000  |
| C | -3.655579000000 | -4.382551000000 | 5.960737000000  |
| C | 3.651914000000  | 4.382897000000  | -5.948927000000 |
| H | 2.002449000000  | 6.139128000000  | -5.169333000000 |
| C | 0.202143000000  | 6.076809000000  | -4.244410000000 |
| O | -7.700575000000 | 3.053721000000  | 0.703956000000  |
| O | 7.600903000000  | -3.165481000000 | -0.504924000000 |
| C | 6.613783000000  | 4.881136000000  | 0.105642000000  |
| C | -6.391864000000 | -4.840516000000 | -0.682889000000 |
| O | 1.811002000000  | -5.818501000000 | 3.052572000000  |
| O | -1.814667000000 | 5.818846000000  | -3.040763000000 |
| C | -3.106931000000 | -7.504428000000 | -1.882687000000 |
| C | -5.368526000000 | -8.171592000000 | -0.999856000000 |

|   |                 |                 |                 |
|---|-----------------|-----------------|-----------------|
| C | -5.860235000000 | -8.176944000000 | 1.337512000000  |
| C | -4.114568000000 | -7.656078000000 | 3.075306000000  |
| C | 4.110903000000  | 7.656424000000  | -3.063497000000 |
| C | 5.856570000000  | 8.177290000000  | -1.325703000000 |
| C | 5.364796000000  | 8.171869000000  | 1.011632000000  |
| C | 3.103202000000  | 7.504705000000  | 1.894464000000  |
| C | 5.301846000000  | -5.489941000000 | -2.752354000000 |
| H | 3.981530000000  | -4.059331000000 | -2.243472000000 |
| C | 4.640360000000  | -7.682775000000 | -2.088919000000 |
| H | 2.840037000000  | -7.745233000000 | -1.163975000000 |
| H | -2.843719000000 | 7.745440000000  | 1.175806000000  |
| C | -4.644025000000 | 7.683120000000  | 2.100729000000  |
| H | -3.985194000000 | 4.059676000000  | 2.255282000000  |
| C | -5.305463000000 | 5.490217000000  | 2.764217000000  |
| H | -6.000712000000 | 4.347733000000  | -0.673581000000 |
| H | 5.724661000000  | -4.300326000000 | 0.626202000000  |
| H | -0.031467000000 | -6.988717000000 | 4.298666000000  |
| H | -3.986282000000 | -5.086011000000 | 5.397480000000  |
| H | -4.388931000000 | -3.837174000000 | 6.255495000000  |
| H | -3.212839000000 | -4.763205000000 | 6.722160000000  |
| H | 4.385249000000  | 3.837382000000  | -6.243664000000 |
| H | 3.209157000000  | 4.763412000000  | -6.710330000000 |
| H | 3.982664000000  | 5.086286000000  | -5.385617000000 |
| H | 0.027803000000  | 6.989063000000  | -4.286858000000 |
| C | -8.533573000000 | 2.265569000000  | 1.539207000000  |
| C | 8.515602000000  | -2.370794000000 | -1.232868000000 |
| H | 6.312802000000  | 5.342595000000  | -0.843096000000 |
| H | 7.687189000000  | 5.024299000000  | 0.251500000000  |
| H | 6.070809000000  | 5.366917000000  | 0.925821000000  |
| H | -5.842146000000 | -5.106745000000 | -1.424094000000 |
| H | -7.307622000000 | -5.063833000000 | -0.866789000000 |
| H | -6.103245000000 | -5.299152000000 | 0.110328000000  |
| C | 3.065357000000  | -5.500565000000 | 3.482806000000  |
| C | -3.068974000000 | 5.500841000000  | -3.470943000000 |
| H | -3.541543000000 | -7.709041000000 | -2.714226000000 |
| H | -2.339736000000 | -8.071276000000 | -1.774198000000 |
| H | -2.828469000000 | -6.584870000000 | -1.884959000000 |
| H | -5.628833000000 | -8.330459000000 | -1.878247000000 |
| C | -6.285960000000 | -8.374694000000 | 0.029317000000  |
| H | -6.460090000000 | -8.325001000000 | 2.032610000000  |
| H | -4.185287000000 | -8.513111000000 | 3.500607000000  |
| H | -4.668950000000 | -7.022398000000 | 3.537922000000  |
| H | 4.665222000000  | 7.022675000000  | -3.526144000000 |
| H | 4.181671000000  | 8.513388000000  | -3.488743000000 |
| H | 6.456426000000  | 8.325347000000  | -2.020801000000 |
| C | 6.282278000000  | 8.374901000000  | -0.017487000000 |



|   |                  |                  |                 |
|---|------------------|------------------|-----------------|
| H | 5.625216000000   | 8.330735000000   | 1.890109000000  |
| H | 2.336054000000   | 8.071483000000   | 1.786029000000  |
| H | 2.824787000000   | 6.585078000000   | 1.896789000000  |
| H | 3.537879000000   | 7.709387000000   | 2.726036000000  |
| H | 5.914202000000   | -4.926652000000  | -3.167081000000 |
| C | 5.544686000000   | -6.840202000000  | -2.676854000000 |
| H | 4.814700000000   | -8.595029000000  | -2.046473000000 |
| C | -5.548368000000  | 6.840409000000   | 2.688684000000  |
| H | -4.818365000000  | 8.595375000000   | 2.058282000000  |
| H | -5.917866000000  | 4.926998000000   | 3.178889000000  |
| H | -8.957658000000  | 1.411051000000   | 0.995421000000  |
| H | -9.343124000000  | 2.918830000000   | 1.867214000000  |
| H | -7.988312000000  | 1.899355000000   | 2.418939000000  |
| H | 9.248877000000   | -2.916288000000  | -1.527527000000 |
| H | 8.072785000000   | -1.990258000000  | -1.994192000000 |
| H | 8.846245000000   | -1.667315000000  | -0.669534000000 |
| C | 4.114219000000   | -6.135666000000  | 2.754785000000  |
| C | 3.416358000000   | -4.672737000000  | 4.505367000000  |
| C | -3.420088000000  | 4.673013000000   | -4.493590000000 |
| C | -4.117836000000  | 6.135942000000   | -2.742922000000 |
| C | -7.691261000000  | -8.747905000000  | -0.255004000000 |
| C | 7.687532000000   | 8.748181000000   | 0.266782000000  |
| O | 6.657170000000   | -7.424812000000  | -3.292567000000 |
| O | -6.660834000000  | 7.425158000000   | 3.304375000000  |
| N | 3.949591000000   | -7.015588000000  | 1.756067000000  |
| C | 5.487680000000   | -5.873378000000  | 3.071107000000  |
| C | 4.785849000000   | -4.406794000000  | 4.790007000000  |
| C | -4.789513000000  | 4.407140000000   | -4.778197000000 |
| C | -5.491297000000  | 5.873655000000   | -3.059244000000 |
| N | -3.953320000000  | 7.015865000000   | -1.744289000000 |
| C | -8.046077000000  | -9.669483000000  | -1.287807000000 |
| C | -8.747860000000  | -8.202968000000  | 0.431148000000  |
| C | 8.744179000000   | 8.203175000000   | -0.419317000000 |
| C | 8.042412000000   | 9.669829000000   | 1.299615000000  |
| C | 7.911525000000   | -7.106877000000  | -2.862333000000 |
| C | -7.915142000000  | 7.107154000000   | 2.874196000000  |
| N | 6.334956000000   | -6.591040000000  | 2.305389000000  |
| C | 5.842495000000   | -4.951800000000  | 4.103909000000  |
| C | -5.846112000000  | 4.952076000000   | -4.092045000000 |
| N | -6.338638000000  | 6.591247000000   | -2.293558000000 |
| N | -7.198736000000  | -10.387075000000 | -2.053493000000 |
| C | -9.419537000000  | -9.931771000000  | -1.604128000000 |
| C | -10.117286000000 | -8.468842000000  | 0.146540000000  |
| C | 10.113621000000  | 8.469187000000   | -0.134731000000 |
| C | 9.415873000000   | 9.932116000000   | 1.615937000000  |
| N | 7.195071000000   | 10.387421000000  | 2.065301000000  |

|   |                  |                  |                 |
|---|------------------|------------------|-----------------|
| C | 8.960386000000   | -7.741978000000  | -3.590353000000 |
| C | 8.262526000000   | -6.279049000000  | -1.839771000000 |
| C | -8.266255000000  | 6.279325000000   | 1.851549000000  |
| C | -8.964004000000  | 7.742254000000   | 3.602217000000  |
| C | 7.247749000000   | -4.578520000000  | 4.388177000000  |
| C | -7.251414000000  | 4.578866000000   | -4.376368000000 |
| N | -9.584054000000  | -10.811693000000 | -2.602760000000 |
| C | -10.468400000000 | -9.296670000000  | -0.876107000000 |
| C | 10.464670000000  | 9.296947000000   | 0.887884000000  |
| N | 9.580436000000   | 10.811969000000  | 2.614624000000  |
| N | 8.795758000000   | -8.621900000000  | -4.589072000000 |
| C | 10.333848000000  | -7.479690000000  | -3.274032000000 |
| C | 9.632017000000   | -6.013106000000  | -1.555132000000 |
| C | -9.635681000000  | 6.013451000000   | 1.566941000000  |
| C | -10.337465000000 | 7.479966000000   | 3.285895000000  |
| N | -8.799487000000  | 8.622176000000   | 4.600849000000  |
| C | 8.165184000000   | -4.375418000000  | 3.359004000000  |
| C | 7.673522000000   | -4.380841000000  | 5.696426000000  |
| C | -7.677139000000  | 4.381116000000   | -5.684562000000 |
| C | -8.168847000000  | 4.375764000000   | -3.347195000000 |
| O | -11.722707000000 | -9.614675000000  | -1.306287000000 |
| O | 11.719025000000  | 9.614882000000   | 1.318118000000  |
| N | 11.181123000000  | -8.197352000000  | -4.039750000000 |
| C | 10.688722000000  | -6.558131000000  | -2.241308000000 |
| C | -10.692339000000 | 6.558408000000   | 2.253171000000  |
| N | -11.184805000000 | 8.197559000000   | 4.051581000000  |
| H | 7.904811000000   | -4.534354000000  | 2.480580000000  |
| C | 9.464918000000   | -3.939178000000  | 3.615282000000  |
| H | 7.073554000000   | -4.528896000000  | 6.391437000000  |
| C | 8.965766000000   | -3.970282000000  | 5.999819000000  |
| C | -8.969496000000  | 3.970559000000   | -5.988041000000 |
| H | -7.077283000000  | 4.529173000000   | -6.379660000000 |
| C | -9.468535000000  | 3.939454000000   | -3.603419000000 |
| H | -7.908541000000  | 4.534631000000   | -2.468804000000 |
| C | -12.835173000000 | -9.029925000000  | -0.690596000000 |
| C | 12.831509000000  | 9.030271000000   | 0.702405000000  |
| C | 12.093917000000  | -6.184832000000  | -1.956962000000 |
| C | -12.097581000000 | 6.185178000000   | 1.968771000000  |
| C | 10.426778000000  | -3.708254000000  | 2.476173000000  |
| C | 9.837952000000   | -3.721430000000  | 4.940805000000  |
| C | 9.419142000000   | -3.859904000000  | 7.434165000000  |
| C | -9.422806000000  | 3.860250000000   | -7.422356000000 |
| C | -9.841682000000  | 3.721706000000   | -4.929029000000 |
| C | -10.430443000000 | 3.708600000000   | -2.464364000000 |
| C | -13.078078000000 | -7.679734000000  | -0.766128000000 |
| C | -13.739516000000 | -9.872637000000  | -0.102640000000 |

|   |                  |                  |                 |
|---|------------------|------------------|-----------------|
| C | 13.735834000000  | 9.872844000000   | 0.114471000000  |
| C | 13.074414000000  | 7.680080000000   | 0.777937000000  |
| C | 13.011351000000  | -5.981730000000  | -2.986135000000 |
| C | 12.519690000000  | -5.987152000000  | -0.648714000000 |
| C | -12.523306000000 | 5.987428000000   | 0.660576000000  |
| C | -13.015016000000 | 5.982076000000   | 2.997945000000  |
| H | 9.992101000000   | -3.912937000000  | 1.644601000000  |
| H | 11.193973000000  | -4.275102000000  | 2.584662000000  |
| H | 10.705240000000  | -2.788696000000  | 2.473901000000  |
| O | 11.135818000000  | -3.316545000000  | 5.215402000000  |
| H | 9.348422000000   | -4.716937000000  | 7.859466000000  |
| H | 10.331591000000  | -3.563330000000  | 7.459657000000  |
| H | 8.864806000000   | -3.226294000000  | 7.896835000000  |
| H | -8.868423000000  | 3.226570000000   | -7.884971000000 |
| H | -10.335321000000 | 3.563608000000   | -7.447879000000 |
| H | -9.352086000000  | 4.717283000000   | -7.847656000000 |
| O | -11.139546000000 | 3.316823000000   | -5.203624000000 |
| H | -11.197638000000 | 4.275447000000   | -2.572852000000 |
| H | -10.708905000000 | 2.789042000000   | -2.462092000000 |
| H | -9.995830000000  | 3.913213000000   | -1.632824000000 |
| H | -12.465675000000 | -7.116515000000  | -1.180801000000 |
| C | -14.236935000000 | -7.165097000000  | -0.222541000000 |
| H | -13.565177000000 | -10.784891000000 | -0.060193000000 |
| C | -14.918393000000 | -9.364150000000  | 0.430423000000  |
| C | 14.914730000000  | 9.364495000000   | -0.418613000000 |
| H | 13.561512000000  | 10.785237000000  | 0.072002000000  |
| C | 14.233270000000  | 7.165443000000   | 0.234349000000  |
| H | 12.462010000000  | 7.116860000000   | 1.192610000000  |
| H | 12.750979000000  | -6.140666000000  | -3.864558000000 |
| C | 14.311086000000  | -5.545490000000  | -2.729857000000 |
| H | 11.919721000000  | -6.135208000000  | 0.046298000000  |
| C | 13.811934000000  | -5.576594000000  | -0.345320000000 |
| C | -13.815663000000 | 5.576870000000   | 0.357098000000  |
| H | -11.923451000000 | 6.135484000000   | -0.034521000000 |
| C | -14.314703000000 | 5.545766000000   | 2.741720000000  |
| H | -12.754708000000 | 6.140942000000   | 3.876335000000  |
| C | 11.251829000000  | -1.912808000000  | 5.410836000000  |
| C | -11.255492000000 | 1.913154000000   | -5.399027000000 |
| C | -15.159843000000 | -8.003917000000  | 0.373997000000  |
| H | -14.398347000000 | -6.249193000000  | -0.257193000000 |
| H | -15.539822000000 | -9.934957000000  | 0.822282000000  |
| H | 15.536157000000  | 9.935302000000   | -0.810474000000 |
| C | 15.156226000000  | 8.004193000000   | -0.362134000000 |
| H | 14.394730000000  | 6.249468000000   | 0.269056000000  |
| C | 15.272945000000  | -5.314566000000  | -3.868967000000 |
| C | 14.684120000000  | -5.327741000000  | -1.404334000000 |

|   |                  |                  |                 |
|---|------------------|------------------|-----------------|
| C | 14.265309000000  | -5.466216000000  | 1.089026000000  |
| C | -14.268974000000 | 5.466562000000   | -1.077217000000 |
| C | -14.687849000000 | 5.328018000000   | 1.416110000000  |
| C | -15.276610000000 | 5.314912000000   | 3.880775000000  |
| H | 10.963210000000  | -1.454172000000  | 4.617618000000  |
| H | 12.167522000000  | -1.689560000000  | 5.594703000000  |
| H | 10.702046000000  | -1.646648000000  | 6.152008000000  |
| H | -10.705727000000 | 1.646855000000   | -6.140178000000 |
| H | -12.171251000000 | 1.689836000000   | -5.582927000000 |
| H | -10.966875000000 | 1.454518000000   | -4.605809000000 |
| O | -16.274696000000 | -7.383948000000  | 0.873957000000  |
| O | 16.271031000000  | 7.384294000000   | -0.862147000000 |
| H | 14.838268000000  | -5.519248000000  | -4.700538000000 |
| H | 16.040140000000  | -5.881413000000  | -3.760478000000 |
| H | 15.551408000000  | -4.395008000000  | -3.871238000000 |
| O | 15.981985000000  | -4.922857000000  | -1.129738000000 |
| H | 14.194589000000  | -6.323249000000  | 1.514327000000  |
| H | 15.177760000000  | -5.169642000000  | 1.114517000000  |
| H | 13.710974000000  | -4.832605000000  | 1.551696000000  |
| H | -13.714590000000 | 4.832882000000   | -1.539833000000 |
| H | -15.181489000000 | 5.169920000000   | -1.102741000000 |
| H | -14.198254000000 | 6.323595000000   | -1.502518000000 |
| O | -15.985715000000 | 4.923135000000   | 1.141514000000  |
| H | -16.043805000000 | 5.881759000000   | 3.772286000000  |
| H | -15.555072000000 | 4.395354000000   | 3.883047000000  |
| H | -14.841998000000 | 5.519525000000   | 4.712315000000  |
| C | -17.189288000000 | -8.178725000000  | 1.601877000000  |
| C | 17.185623000000  | 8.179070000000   | -1.590068000000 |
| C | 16.097996000000  | -3.519120000000  | -0.934303000000 |
| C | -16.101661000000 | 3.519466000000   | 0.946112000000  |
| H | -17.520038000000 | -8.882114000000  | 1.038567000000  |
| H | -17.922623000000 | -7.633210000000  | 1.896613000000  |
| H | -16.746531000000 | -8.559241000000  | 2.363279000000  |
| H | 17.918958000000  | 7.633556000000   | -1.884804000000 |
| H | 16.742866000000  | 8.559586000000   | -2.351470000000 |
| H | 17.516309000000  | 8.882391000000   | -1.026790000000 |
| H | 15.809377000000  | -3.060484000000  | -1.727521000000 |
| H | 17.013689000000  | -3.295872000000  | -0.750435000000 |
| H | 15.548213000000  | -3.252960000000  | -0.193130000000 |
| H | -15.551894000000 | 3.253167000000   | 0.204961000000  |
| H | -17.017419000000 | 3.296148000000   | 0.762212000000  |
| H | -15.813042000000 | 3.060829000000   | 1.739330000000  |
| S | 10.275901000000  | -9.074957000000  | -5.042895000000 |
| S | -8.103975000000  | -11.264819000000 | -3.056615000000 |
| S | 5.429734000000   | -7.468645000000  | 1.302244000000  |
| S | -5.433398000000  | 7.468991000000   | -1.290434000000 |

|   |                  |                 |                 |
|---|------------------|-----------------|-----------------|
| S | 8.100293000000   | 11.265026000000 | 3.068447000000  |
| S | -10.279566000000 | 9.075303000000  | 5.054704000000  |
| F | 0.200544000000   | 3.114637000000  | 1.124165000000  |
| F | -2.254880000000  | 2.494083000000  | 0.770770000000  |
| F | 11.032832000000  | 7.907734000000  | -0.958493000000 |
| F | 8.508160000000   | 7.287329000000  | -1.394261000000 |
| F | -7.345155000000  | 5.755052000000  | 1.010139000000  |
| F | -9.873201000000  | 5.117149000000  | 0.578122000000  |
| F | -2.500807000000  | 4.108760000000  | -5.315213000000 |
| F | -5.026008000000  | 3.487018000000  | -5.748950000000 |
| F | 2.366149000000   | -2.584517000000 | -0.629897000000 |
| F | -0.164053000000  | -3.222468000000 | -1.070583000000 |
| F | -8.510888000000  | -7.282349000000 | 1.401544000000  |
| F | -11.036429000000 | -7.906674000000 | 0.969871000000  |
| F | 9.870171000000   | -5.135039000000 | -0.551271000000 |
| F | 7.340092000000   | -5.770769000000 | -0.989593000000 |
| F | 5.022323000000   | -3.486552000000 | 5.760645000000  |
| F | 2.497068000000   | -4.108420000000 | 5.326918000000  |

CB:

|   |                 |                 |                 |
|---|-----------------|-----------------|-----------------|
| S | 2.200490000000  | -0.924002000000 | 4.791877000000  |
| S | 0.507470000000  | 3.570641000000  | -0.404752000000 |
| O | -1.584924000000 | -1.544788000000 | 2.826100000000  |
| O | 4.209794000000  | 5.263602000000  | 1.766409000000  |
| O | -2.404603000000 | 9.260113000000  | -0.358628000000 |
| O | -0.423183000000 | -4.488429000000 | -4.248431000000 |
| N | 2.894545000000  | -0.524784000000 | 3.357150000000  |
| N | -0.053607000000 | 3.224864000000  | 1.164099000000  |
| O | 5.456598000000  | 2.734325000000  | 8.333507000000  |
| O | -3.760117000000 | -0.901201000000 | -4.097280000000 |
| N | 0.671050000000  | -1.214231000000 | 4.286391000000  |
| N | 2.047377000000  | 4.065432000000  | 0.125872000000  |
| C | 1.948696000000  | -0.601375000000 | 2.416491000000  |
| C | 0.882228000000  | 3.645154000000  | 2.047029000000  |
| C | 0.667110000000  | -0.988145000000 | 2.974575000000  |
| C | 2.021239000000  | 4.114511000000  | 1.477115000000  |
| C | 2.124361000000  | -0.347041000000 | 0.993045000000  |
| C | 0.747125000000  | 3.591339000000  | 3.453881000000  |
| C | 0.906452000000  | -0.231623000000 | 0.313889000000  |
| C | 1.781333000000  | 4.015860000000  | 4.273257000000  |
| C | -0.525143000000 | -1.030264000000 | 2.180362000000  |
| C | 3.044029000000  | 4.619556000000  | 2.291326000000  |
| C | -0.408264000000 | -0.519798000000 | 0.899402000000  |
| C | 2.930644000000  | 4.531127000000  | 3.701511000000  |
| C | 3.461583000000  | -0.412438000000 | 0.341581000000  |
| C | -0.578273000000 | 3.080194000000  | 4.044740000000  |

|   |                 |                 |                 |
|---|-----------------|-----------------|-----------------|
| C | 4.593263000000  | -0.899903000000 | 1.037268000000  |
| C | -1.741153000000 | 3.553535000000  | 3.535605000000  |
| H | 4.560334000000  | -1.010681000000 | 2.111242000000  |
| H | -1.719632000000 | 4.277452000000  | 2.746548000000  |
| C | -2.920018000000 | -1.421532000000 | 2.418636000000  |
| C | 5.006033000000  | 4.583341000000  | 0.789262000000  |
| C | 3.624815000000  | -0.204990000000 | -1.041810000000 |
| C | -0.586901000000 | 2.150294000000  | 5.084538000000  |
| H | 2.861384000000  | 0.283099000000  | -1.624121000000 |
| H | 0.334610000000  | 1.752411000000  | 5.454079000000  |
| C | -3.749438000000 | -0.714744000000 | 3.276093000000  |
| C | 5.241859000000  | 3.248189000000  | 0.849798000000  |
| H | -3.332544000000 | -0.316610000000 | 4.191926000000  |
| H | 4.768624000000  | 2.655191000000  | 1.604763000000  |
| C | -4.668094000000 | 2.119468000000  | -2.982760000000 |
| C | 4.183677000000  | -5.224810000000 | 0.512902000000  |
| C | -5.095471000000 | -0.543728000000 | 2.961892000000  |
| C | 6.127061000000  | 2.649369000000  | -0.074043000000 |
| H | -5.729712000000 | 0.013621000000  | 3.639965000000  |
| H | 6.327951000000  | 1.602767000000  | -0.011220000000 |
| C | 4.738618000000  | -0.655719000000 | -1.746422000000 |
| C | -1.800651000000 | 1.706030000000  | 5.615913000000  |
| C | 5.773047000000  | -1.272463000000 | -1.029494000000 |
| C | -3.013484000000 | 2.233536000000  | 5.128302000000  |
| C | 5.747853000000  | -1.313866000000 | 0.374184000000  |
| C | -2.971455000000 | 3.144549000000  | 4.056100000000  |
| C | -3.469973000000 | 2.325528000000  | -2.270302000000 |
| C | 3.281513000000  | -4.211863000000 | 0.155688000000  |
| H | -3.458815000000 | 2.271375000000  | -1.203786000000 |
| H | 3.644197000000  | -3.227179000000 | -0.046160000000 |
| C | -2.275174000000 | 2.599813000000  | -2.969671000000 |
| C | 1.910757000000  | -4.478516000000 | 0.073989000000  |
| H | -1.362405000000 | 2.733814000000  | -2.428492000000 |
| H | 1.220635000000  | -3.696193000000 | -0.161092000000 |
| C | -1.260492000000 | 9.489742000000  | -1.181259000000 |
| C | -0.552414000000 | -4.600503000000 | -2.811764000000 |
| H | -0.675128000000 | 10.274900000000 | -0.746327000000 |
| H | -1.586183000000 | -4.521304000000 | -2.542397000000 |
| H | -1.571630000000 | 9.778178000000  | -2.161850000000 |
| H | -0.172996000000 | -5.550473000000 | -2.495107000000 |
| H | -0.673304000000 | 8.598492000000  | -1.240777000000 |
| H | -0.000106000000 | -3.819976000000 | -2.326771000000 |
| C | 4.780177000000  | -0.488584000000 | -3.248044000000 |
| C | -1.767119000000 | 0.629800000000  | 6.716838000000  |
| H | -3.984904000000 | 10.714583000000 | -1.551130000000 |
| H | -0.385123000000 | -6.940770000000 | -4.586977000000 |

|   |                 |                 |                 |
|---|-----------------|-----------------|-----------------|
| H | 4.454938000000  | 0.518361000000  | -3.530570000000 |
| H | -1.455905000000 | -0.304944000000 | 6.290576000000  |
| H | 4.100317000000  | -1.191857000000 | -3.740525000000 |
| H | -1.073072000000 | 0.923792000000  | 7.474031000000  |
| C | 6.941987000000  | -1.841068000000 | 1.128877000000  |
| C | -4.256226000000 | 3.720847000000  | 3.431591000000  |
| H | 6.710744000000  | -1.961956000000 | 2.190323000000  |
| H | -4.205789000000 | 3.607834000000  | 2.368291000000  |
| H | 7.793712000000  | -1.157206000000 | 1.034211000000  |
| H | -5.108313000000 | 3.196489000000  | 3.807213000000  |
| H | 7.282462000000  | -2.803072000000 | 0.734931000000  |
| H | -4.341737000000 | 4.760366000000  | 3.676074000000  |
| C | 5.468914000000  | 4.122943000000  | 7.957018000000  |
| C | -2.372780000000 | -1.258129000000 | -3.941381000000 |
| H | 4.491132000000  | 4.475196000000  | 7.682154000000  |
| H | -1.771661000000 | -0.411734000000 | -4.213414000000 |
| H | 6.132440000000  | 4.269909000000  | 7.130442000000  |
| H | -2.164082000000 | -1.529048000000 | -2.927734000000 |
| H | 5.818344000000  | 4.668420000000  | 8.806207000000  |
| H | -2.140081000000 | -2.081626000000 | -4.582948000000 |
| C | -3.299240000000 | 8.248850000000  | -0.852385000000 |
| C | 0.947820000000  | -4.641145000000 | -4.651240000000 |
| C | 5.907275000000  | 1.818536000000  | 7.323116000000  |
| C | -4.744318000000 | -1.884458000000 | -3.695897000000 |
| C | -3.425356000000 | -2.041157000000 | 1.276915000000  |
| C | 5.561075000000  | 5.323129000000  | -0.192670000000 |
| C | -4.665270000000 | 2.238105000000  | -4.380553000000 |
| O | -5.922180000000 | 1.785698000000  | -2.346140000000 |
| O | 5.578175000000  | -4.856581000000 | 0.637721000000  |
| C | 3.707021000000  | -6.482418000000 | 0.730849000000  |
| C | -5.597271000000 | -1.086891000000 | 1.772585000000  |
| C | 6.721978000000  | 3.414769000000  | -1.038059000000 |
| O | 6.862855000000  | -1.827614000000 | -1.665835000000 |
| O | -4.270713000000 | 1.838263000000  | 5.704076000000  |
| C | -2.282255000000 | 2.682869000000  | -4.377587000000 |
| C | 1.461021000000  | -5.728086000000 | 0.286373000000  |
| H | 5.783967000000  | -0.649016000000 | -3.647564000000 |
| H | -2.739616000000 | 0.517177000000  | 7.144822000000  |
| C | -3.119321000000 | 6.895931000000  | -0.491742000000 |
| C | -4.399468000000 | 8.609885000000  | -1.661625000000 |
| C | 1.502544000000  | -5.923670000000 | -4.788854000000 |
| C | 1.755372000000  | -3.515437000000 | -4.908861000000 |
| C | 5.105946000000  | 0.983008000000  | 6.618177000000  |
| C | 7.247178000000  | 1.796646000000  | 7.122050000000  |
| C | -4.462959000000 | -3.202699000000 | -3.516786000000 |
| C | -6.060140000000 | -1.440062000000 | -3.495877000000 |

|   |                 |                 |                 |
|---|-----------------|-----------------|-----------------|
| H | -2.784456000000 | -2.636886000000 | 0.637239000000  |
| C | -4.754668000000 | -1.834703000000 | 0.936164000000  |
| C | 6.429798000000  | 4.735361000000  | -1.111553000000 |
| H | 5.341625000000  | 6.369200000000  | -0.255858000000 |
| C | -3.483227000000 | 2.532722000000  | -5.070124000000 |
| H | -5.577124000000 | 2.102409000000  | -4.924212000000 |
| C | -5.821844000000 | 1.204863000000  | -1.032575000000 |
| C | 6.516694000000  | -5.923200000000 | 0.865061000000  |
| H | 4.369674000000  | -7.283896000000 | 0.980905000000  |
| C | 2.322975000000  | -6.727117000000 | 0.620888000000  |
| O | -6.888495000000 | -0.959625000000 | 1.361871000000  |
| O | 7.677615000000  | 2.905478000000  | -1.996977000000 |
| C | 6.594440000000  | -3.058755000000 | -2.345902000000 |
| C | -4.686699000000 | 2.724741000000  | 6.760706000000  |
| O | -1.075097000000 | 2.892976000000  | -5.138615000000 |
| O | 0.078252000000  | -6.040769000000 | 0.131775000000  |
| C | -1.991366000000 | 6.446619000000  | 0.449357000000  |
| C | -4.046274000000 | 5.942784000000  | -0.904940000000 |
| C | -5.301548000000 | 7.639100000000  | -2.086663000000 |
| C | -4.659299000000 | 10.068616000000 | -2.070210000000 |
| C | 0.651191000000  | -7.198676000000 | -4.640789000000 |
| C | 2.863030000000  | -6.056996000000 | -5.053454000000 |
| C | 3.117084000000  | -3.683268000000 | -5.201595000000 |
| C | 1.155819000000  | -2.098673000000 | -4.859195000000 |
| C | 5.660465000000  | 0.091062000000  | 5.746091000000  |
| H | 4.048588000000  | 1.007888000000  | 6.753486000000  |
| C | 7.816351000000  | 0.888142000000  | 6.222543000000  |
| H | 7.869713000000  | 2.479387000000  | 7.668404000000  |
| H | -3.472863000000 | -3.575552000000 | -3.663536000000 |
| C | -5.487242000000 | -4.086422000000 | -3.134446000000 |
| H | -6.293096000000 | -0.404760000000 | -3.637618000000 |
| C | -7.068939000000 | -2.343893000000 | -3.119695000000 |
| H | -5.157708000000 | -2.240653000000 | 0.014862000000  |
| H | 6.878729000000  | 5.335354000000  | -1.874755000000 |
| H | -3.493675000000 | 2.637713000000  | -6.135125000000 |
| H | -5.139120000000 | 0.381260000000  | -1.041811000000 |
| H | -6.792530000000 | 0.857989000000  | -0.734668000000 |
| H | -5.478667000000 | 1.942299000000  | -0.338184000000 |
| H | 7.508053000000  | -5.511736000000 | 0.866699000000  |
| H | 6.315495000000  | -6.372366000000 | 1.814914000000  |
| H | 6.443357000000  | -6.665023000000 | 0.099001000000  |
| H | 1.940626000000  | -7.713439000000 | 0.789804000000  |
| C | -7.749940000000 | -0.153245000000 | 2.148904000000  |
| C | 7.820339000000  | 1.477946000000  | -2.077453000000 |
| H | 5.768719000000  | -3.600948000000 | -1.872436000000 |
| H | 7.499221000000  | -3.667567000000 | -2.280884000000 |



|   |                 |                 |                 |
|---|-----------------|-----------------|-----------------|
| H | 6.347881000000  | -2.886337000000 | -3.400228000000 |
| H | -3.951901000000 | 2.733839000000  | 7.539334000000  |
| H | -5.620701000000 | 2.381855000000  | 7.156990000000  |
| H | -4.806061000000 | 3.716361000000  | 6.375143000000  |
| C | -0.179953000000 | 3.847835000000  | -4.580778000000 |
| C | -0.880939000000 | -5.670319000000 | 1.147980000000  |
| H | -2.425897000000 | 5.989679000000  | 1.315511000000  |
| H | -1.408731000000 | 7.291050000000  | 0.745098000000  |
| H | -1.365466000000 | 5.738360000000  | -0.051016000000 |
| H | -3.908248000000 | 4.911591000000  | -0.638271000000 |
| C | -5.146814000000 | 6.329911000000  | -1.672077000000 |
| H | -6.127614000000 | 7.905605000000  | -2.711938000000 |
| H | -5.669044000000 | 10.327602000000 | -1.814707000000 |
| H | -4.519691000000 | 10.176026000000 | -3.123682000000 |
| H | 0.940680000000  | -7.709208000000 | -3.747332000000 |
| H | 0.814454000000  | -7.837184000000 | -5.486597000000 |
| H | 3.293582000000  | -7.032212000000 | -5.146173000000 |
| C | 3.664992000000  | -4.921332000000 | -5.196626000000 |
| H | 3.729851000000  | -2.830119000000 | -5.411076000000 |
| H | 0.278517000000  | -2.059733000000 | -5.469473000000 |
| H | 0.901440000000  | -1.862735000000 | -3.848506000000 |
| H | 1.872593000000  | -1.388853000000 | -5.222260000000 |
| H | 5.034561000000  | -0.587868000000 | 5.208936000000  |
| C | 7.000769000000  | 0.034491000000  | 5.551833000000  |
| H | 8.878761000000  | 0.865542000000  | 6.079218000000  |
| C | -6.757270000000 | -3.657775000000 | -2.946749000000 |
| H | -5.269778000000 | -5.124311000000 | -2.989790000000 |
| H | -8.070350000000 | -1.994541000000 | -2.974243000000 |
| H | -7.881981000000 | -0.560942000000 | 3.158870000000  |
| H | -8.708905000000 | -0.156304000000 | 1.638291000000  |
| H | -7.377453000000 | 0.875361000000  | 2.222549000000  |
| H | 8.510002000000  | 1.247900000000  | -2.866826000000 |
| H | 8.203265000000  | 1.107793000000  | -1.150043000000 |
| H | 6.879413000000  | 1.014317000000  | -2.283547000000 |
| C | -0.665210000000 | 5.249245000000  | -4.199636000000 |
| C | 1.173385000000  | 3.500039000000  | -4.376954000000 |
| C | -0.606548000000 | -5.176589000000 | 2.474380000000  |
| C | -2.210387000000 | -5.855813000000 | 0.752898000000  |
| C | -6.221588000000 | 5.323802000000  | -2.029092000000 |
| C | 5.185496000000  | -5.045955000000 | -5.325087000000 |
| O | 7.502973000000  | -0.965667000000 | 4.652966000000  |
| O | -7.715937000000 | -4.660180000000 | -2.573361000000 |
| N | -1.902607000000 | 5.730165000000  | -4.424949000000 |
| C | 0.177604000000  | 6.114475000000  | -3.618350000000 |
| C | 2.106043000000  | 4.479332000000  | -3.615464000000 |
| C | -1.676864000000 | -4.948666000000 | 3.336904000000  |

|   |                  |                 |                 |
|---|------------------|-----------------|-----------------|
| C | -3.227596000000  | -5.632517000000 | 1.604173000000  |
| N | -2.575958000000  | -6.303875000000 | -0.471555000000 |
| C | -6.829837000000  | 4.577282000000  | -0.839765000000 |
| C | -6.664614000000  | 5.100337000000  | -3.308273000000 |
| C | 5.891513000000   | -5.765182000000 | -4.374982000000 |
| C | 5.860060000000   | -4.401272000000 | -6.382046000000 |
| C | 8.683964000000   | -0.630250000000 | 3.913139000000  |
| C | -8.896788000000  | -4.199177000000 | -1.907477000000 |
| N | -0.328887000000  | 7.345055000000  | -3.389295000000 |
| C | 1.603768000000   | 5.709114000000  | -3.253625000000 |
| C | -2.968068000000  | -5.220543000000 | 2.917259000000  |
| N | -4.456678000000  | -5.905849000000 | 1.102043000000  |
| N | -6.423072000000  | 4.757991000000  | 0.433989000000  |
| C | -7.866595000000  | 3.725682000000  | -1.004985000000 |
| C | -7.825436000000  | 4.104194000000  | -3.528366000000 |
| C | 7.264459000000   | -5.865259000000 | -4.473090000000 |
| C | 7.209231000000   | -4.465769000000 | -6.474852000000 |
| N | 5.258046000000   | -3.688526000000 | -7.364901000000 |
| C | 9.713345000000   | -1.511104000000 | 3.999168000000  |
| C | 8.804975000000   | 0.512716000000  | 3.135024000000  |
| C | -8.911885000000  | -3.973566000000 | -0.506368000000 |
| C | -10.061167000000 | -4.002519000000 | -2.660096000000 |
| C | 2.377813000000   | 6.753409000000  | -2.484885000000 |
| C | -4.152606000000  | -5.109318000000 | 3.881999000000  |
| N | -8.360657000000  | 3.219098000000  | 0.145017000000  |
| C | -8.398693000000  | 3.434311000000  | -2.428138000000 |
| C | 7.945818000000   | -5.180984000000 | -5.518240000000 |
| N | 7.741876000000   | -3.802628000000 | -7.525372000000 |
| N | 9.668028000000   | -2.655072000000 | 4.719853000000  |
| C | 10.881654000000  | -1.297668000000 | 3.356945000000  |
| C | 10.025072000000  | 0.753022000000  | 2.438009000000  |
| C | -10.093963000000 | -3.581871000000 | 0.106099000000  |
| C | -11.202844000000 | -3.614829000000 | -2.053642000000 |
| N | -10.166146000000 | -4.205742000000 | -3.994802000000 |
| C | 1.929139000000   | 7.034639000000  | -1.198226000000 |
| C | 3.475305000000   | 7.407199000000  | -3.019545000000 |
| C | -4.080396000000  | -5.800617000000 | 5.092053000000  |
| C | -5.249594000000  | -4.380529000000 | 3.563985000000  |
| O | -9.456573000000  | 2.511873000000  | -2.706543000000 |
| O | 9.373660000000   | -5.232826000000 | -5.565282000000 |
| N | 11.819575000000  | -2.254797000000 | 3.548267000000  |
| C | 11.049080000000  | -0.173062000000 | 2.549592000000  |
| C | -11.236441000000 | -3.407922000000 | -0.665599000000 |
| N | -12.272503000000 | -3.501874000000 | -2.875344000000 |
| H | 1.078856000000   | 6.511982000000  | -0.805511000000 |
| C | 2.600861000000   | 7.956150000000  | -0.407883000000 |

|   |                  |                 |                 |
|---|------------------|-----------------|-----------------|
| H | 3.795798000000   | 7.195234000000  | -4.018661000000 |
| C | 4.139361000000   | 8.367612000000  | -2.253982000000 |
| C | -5.119487000000  | -5.722605000000 | 6.012941000000  |
| H | -3.223650000000  | -6.406004000000 | 5.307823000000  |
| C | -6.304254000000  | -4.265681000000 | 4.481385000000  |
| H | -5.310305000000  | -3.888708000000 | 2.615102000000  |
| C | -10.248944000000 | 2.140610000000  | -1.580854000000 |
| C | 9.943969000000   | -4.497219000000 | -4.464944000000 |
| C | 12.374254000000  | -0.019678000000 | 1.803535000000  |
| C | -12.569926000000 | -2.989811000000 | -0.036226000000 |
| C | 2.078696000000   | 8.212439000000  | 1.018927000000  |
| C | 3.724165000000   | 8.630674000000  | -0.926558000000 |
| C | 5.299989000000   | 9.136364000000  | -2.902743000000 |
| C | -5.016146000000  | -6.538192000000 | 7.315466000000  |
| C | -6.231083000000  | -4.913953000000 | 5.730972000000  |
| C | -7.542381000000  | -3.433792000000 | 4.106941000000  |
| C | -10.078916000000 | 0.870940000000  | -1.011778000000 |
| C | -11.197524000000 | 3.020289000000  | -1.065030000000 |
| C | 10.872485000000  | -5.145092000000 | -3.723981000000 |
| C | 9.582307000000   | -3.223382000000 | -4.143149000000 |
| C | 12.362922000000  | 0.094372000000  | 0.421128000000  |
| C | 13.581706000000  | -0.004258000000 | 2.507183000000  |
| C | -13.099078000000 | -3.705587000000 | 1.037896000000  |
| C | -13.217564000000 | -1.915874000000 | -0.538191000000 |
| H | 1.017893000000   | 8.361294000000  | 0.982684000000  |
| H | 2.547364000000   | 9.082812000000  | 1.423107000000  |
| H | 2.297981000000   | 7.367543000000  | 1.638709000000  |
| O | 4.388078000000   | 9.621830000000  | -0.130182000000 |
| H | 4.965165000000   | 9.563542000000  | -3.829946000000 |
| H | 5.625281000000   | 9.918186000000  | -2.251063000000 |
| H | 6.107040000000   | 8.464736000000  | -3.090855000000 |
| H | -4.225073000000  | -6.146519000000 | 7.918330000000  |
| H | -5.938315000000  | -6.480561000000 | 7.853170000000  |
| H | -4.808193000000  | -7.562406000000 | 7.074134000000  |
| O | -7.287885000000  | -4.760685000000 | 6.693469000000  |
| H | -8.421860000000  | -4.020487000000 | 4.267120000000  |
| H | -7.580989000000  | -2.555524000000 | 4.714927000000  |
| H | -7.485369000000  | -3.150225000000 | 3.074985000000  |
| H | -9.350822000000  | 0.199852000000  | -1.422123000000 |
| C | -10.865696000000 | 0.474895000000  | 0.083478000000  |
| H | -11.325742000000 | 3.986028000000  | -1.508290000000 |
| C | -11.980359000000 | 2.633763000000  | 0.029071000000  |
| C | 11.440209000000  | -4.557507000000 | -2.576940000000 |
| H | 11.167558000000  | -6.129218000000 | -4.021067000000 |
| C | 10.131978000000  | -2.615735000000 | -2.998689000000 |
| H | 8.887156000000   | -2.683312000000 | -4.752291000000 |

|   |                  |                 |                 |
|---|------------------|-----------------|-----------------|
| H | 11.433046000000  | 0.054364000000  | -0.107427000000 |
| C | 13.556639000000  | 0.237023000000  | -0.280723000000 |
| H | 13.585645000000  | -0.099584000000 | 3.574844000000  |
| C | 14.784317000000  | 0.177893000000  | 1.821118000000  |
| C | -14.279750000000 | -3.281489000000 | 1.645808000000  |
| H | -12.603989000000 | -4.587226000000 | 1.391544000000  |
| C | -14.392637000000 | -1.453546000000 | 0.056851000000  |
| H | -12.809353000000 | -1.393478000000 | -1.378574000000 |
| C | 5.416432000000   | 9.093577000000  | 0.697653000000  |
| C | -7.031039000000  | -3.702097000000 | 7.636692000000  |
| C | -11.818854000000 | 1.366241000000  | 0.613937000000  |
| H | -10.736424000000 | -0.498351000000 | 0.504348000000  |
| H | -12.711886000000 | 3.307560000000  | 0.423262000000  |
| H | 12.157809000000  | -5.105226000000 | -2.004630000000 |
| C | 11.063724000000  | -3.302677000000 | -2.206372000000 |
| H | 9.844042000000   | -1.620214000000 | -2.727019000000 |
| C | 13.497947000000  | 0.260709000000  | -1.819525000000 |
| C | 14.779442000000  | 0.327785000000  | 0.416465000000  |
| C | 16.093587000000  | 0.194456000000  | 2.631704000000  |
| C | -14.856285000000 | -4.123372000000 | 2.798964000000  |
| C | -14.920471000000 | -2.115372000000 | 1.183011000000  |
| C | -15.084950000000 | -0.220248000000 | -0.553359000000 |
| H | 5.007298000000   | 8.349330000000  | 1.346009000000  |
| H | 5.832658000000   | 9.888453000000  | 1.282597000000  |
| H | 6.180396000000   | 8.658781000000  | 0.090946000000  |
| H | -6.134826000000  | -3.914294000000 | 8.182217000000  |
| H | -7.855395000000  | -3.635257000000 | 8.317214000000  |
| H | -6.919176000000  | -2.770075000000 | 7.121442000000  |
| O | -12.660647000000 | 1.044833000000  | 1.742846000000  |
| O | 11.577625000000  | -2.619544000000 | -1.036775000000 |
| H | 12.936509000000  | -0.588726000000 | -2.162717000000 |
| H | 14.487806000000  | 0.214810000000  | -2.220868000000 |
| H | 13.020112000000  | 1.157791000000  | -2.143917000000 |
| O | 16.009586000000  | 0.501048000000  | -0.299845000000 |
| H | 16.120591000000  | -0.667831000000 | 3.267617000000  |
| H | 16.930943000000  | 0.173616000000  | 1.967637000000  |
| H | 16.134397000000  | 1.080212000000  | 3.230107000000  |
| H | -14.195896000000 | -4.073633000000 | 3.635992000000  |
| H | -15.818381000000 | -3.748742000000 | 3.076516000000  |
| H | -14.952478000000 | -5.143987000000 | 2.478499000000  |
| O | -16.122327000000 | -1.639159000000 | 1.803580000000  |
| H | -16.064071000000 | -0.112100000000 | -0.138310000000 |
| H | -14.507812000000 | 0.654681000000  | -0.340558000000 |
| H | -15.159911000000 | -0.349134000000 | -1.614767000000 |
| C | -12.172348000000 | 0.017732000000  | 2.624267000000  |
| C | 12.320587000000  | -3.414226000000 | -0.093374000000 |

|   |                  |                 |                 |
|---|------------------|-----------------|-----------------|
| C | 16.356366000000  | 1.866975000000  | -0.484721000000 |
| C | -15.864349000000 | -0.679848000000 | 2.822855000000  |
| H | -12.817473000000 | -0.033167000000 | 3.479709000000  |
| H | -11.177169000000 | 0.245403000000  | 2.943209000000  |
| H | -12.175678000000 | -0.925430000000 | 2.119279000000  |
| H | 12.548112000000  | -2.806831000000 | 0.761965000000  |
| H | 11.751080000000  | -4.264101000000 | 0.218902000000  |
| H | 13.229940000000  | -3.744232000000 | -0.548659000000 |
| H | 15.588300000000  | 2.359677000000  | -1.040564000000 |
| H | 17.279690000000  | 1.921372000000  | -1.024083000000 |
| H | 16.469576000000  | 2.340136000000  | 0.466349000000  |
| H | -15.269949000000 | -1.123870000000 | 3.591788000000  |
| H | -16.795549000000 | -0.350138000000 | 3.235626000000  |
| H | -15.343362000000 | 0.154737000000  | 2.405060000000  |
| S | 11.113649000000  | -3.510254000000 | 4.453489000000  |
| S | -7.377639000000  | 3.766436000000  | 1.425905000000  |
| S | -1.886564000000  | 7.392097000000  | -4.062926000000 |
| S | -4.272834000000  | -6.389152000000 | -0.520218000000 |
| S | 6.460537000000   | -3.192847000000 | -8.464756000000 |
| S | -11.755078000000 | -3.813948000000 | -4.464906000000 |
| C | 0.796196000000   | 0.117980000000  | -1.072027000000 |
| C | -1.530847000000  | -0.282987000000 | 0.053001000000  |
| C | 8.086146000000   | -6.690567000000 | -3.428510000000 |
| C | 5.133823000000   | -6.391112000000 | -3.154879000000 |
| C | -7.596944000000  | -4.170369000000 | 0.310450000000  |
| C | -10.112868000000 | -3.301043000000 | 1.642471000000  |
| C | 0.839900000000   | -4.892200000000 | 2.970716000000  |
| C | -1.420974000000  | -4.358211000000 | 4.767718000000  |
| C | 4.115359000000   | 5.062628000000  | 4.571754000000  |
| C | 1.641084000000   | 3.976551000000  | 5.831500000000  |
| C | 10.220886000000  | 2.062933000000  | 1.599921000000  |
| C | 7.612213000000   | 1.509352000000  | 3.021745000000  |
| C | -6.012873000000  | 5.787870000000  | -4.541235000000 |
| C | -8.366860000000  | 3.813082000000  | -4.952267000000 |
| C | 3.540884000000   | 4.021368000000  | -3.214841000000 |
| C | 1.696579000000   | 2.137592000000  | -4.902151000000 |
| N | -2.398479000000  | -0.065669000000 | -0.688464000000 |
| N | 0.601028000000   | 0.417682000000  | -2.179739000000 |
| N | -6.613507000000  | -4.318935000000 | 0.905188000000  |
| N | -10.122454000000 | -3.094266000000 | 2.780728000000  |
| N | -1.251272000000  | -3.923815000000 | 5.829861000000  |
| N | 1.916704000000   | -4.683360000000 | 3.327308000000  |
| N | 4.573799000000   | -6.853734000000 | -2.253094000000 |
| N | 8.705480000000   | -7.298157000000 | -2.663900000000 |
| N | -5.519842000000  | 6.302592000000  | -5.445508000000 |
| N | -8.769004000000  | 3.596691000000  | -6.008048000000 |

|   |                 |                |                 |
|---|-----------------|----------------|-----------------|
| N | 4.602374000000  | 3.688466000000 | -2.916169000000 |
| N | 2.072522000000  | 1.126310000000 | -5.296502000000 |
| N | 10.353102000000 | 3.036110000000 | 0.981151000000  |
| N | 6.738706000000  | 2.261726000000 | 2.930283000000  |
| N | 5.009748000000  | 5.460487000000 | 5.195227000000  |
| N | 1.547554000000  | 3.950023000000 | 6.982660000000  |

NB:

|   |                 |                 |                 |
|---|-----------------|-----------------|-----------------|
| S | 2.314578000000  | 0.026983000000  | 5.066411000000  |
| S | 0.903718000000  | 3.111572000000  | -0.774272000000 |
| O | -1.666040000000 | -0.588796000000 | 3.534865000000  |
| O | 4.543631000000  | 5.284511000000  | 1.099169000000  |
| O | -1.815502000000 | 9.237179000000  | -1.088014000000 |
| O | -0.766143000000 | -4.785435000000 | -3.624493000000 |
| N | 2.904159000000  | 0.138372000000  | 3.534365000000  |
| N | 0.350491000000  | 3.186376000000  | 0.910123000000  |
| O | 5.542343000000  | 3.797088000000  | 7.575897000000  |
| O | -3.662955000000 | -0.998825000000 | -3.812942000000 |
| N | 0.743670000000  | -0.281085000000 | 4.739984000000  |
| N | 2.417524000000  | 3.853997000000  | -0.231158000000 |
| C | 1.882736000000  | -0.064970000000 | 2.699987000000  |
| C | 1.273269000000  | 3.754026000000  | 1.707476000000  |
| C | 0.639995000000  | -0.284684000000 | 3.414726000000  |
| C | 2.395136000000  | 4.100584000000  | 1.089352000000  |
| C | 1.956209000000  | -0.167884000000 | 1.249751000000  |
| C | 1.074247000000  | 4.017051000000  | 3.081335000000  |
| C | 0.701619000000  | -0.234665000000 | 0.666885000000  |
| C | 2.073867000000  | 4.658368000000  | 3.772936000000  |
| C | -0.617896000000 | -0.357708000000 | 2.734599000000  |
| C | 3.435825000000  | 4.733958000000  | 1.781276000000  |
| C | -0.549512000000 | -0.146651000000 | 1.371651000000  |
| C | 3.237301000000  | 5.022580000000  | 3.151927000000  |
| C | 3.236777000000  | -0.382650000000 | 0.525350000000  |
| C | -0.217382000000 | 3.621284000000  | 3.737092000000  |
| C | 4.394410000000  | -0.832209000000 | 1.196126000000  |
| C | -1.397951000000 | 3.919783000000  | 3.151807000000  |
| H | 4.421178000000  | -0.843485000000 | 2.276842000000  |
| H | -1.410466000000 | 4.437961000000  | 2.206018000000  |
| C | -2.976928000000 | -0.771033000000 | 3.084001000000  |
| C | 5.275201000000  | 4.462488000000  | 0.217579000000  |
| C | 3.294319000000  | -0.327726000000 | -0.878776000000 |
| C | -0.216781000000 | 2.931763000000  | 4.964186000000  |
| H | 2.505539000000  | 0.136850000000  | -1.451288000000 |
| H | 0.721493000000  | 2.676518000000  | 5.437957000000  |
| C | -3.952621000000 | -0.134042000000 | 3.833463000000  |
| C | 5.387574000000  | 3.122536000000  | 0.375073000000  |

|   |                |                |                |
|---|----------------|----------------|----------------|
| H | -3.66024000000 | 0.35159800000  | 4.75332600000  |
| H | 4.89294700000  | 2.62848400000  | 1.19779900000  |
| C | -4.38817800000 | 2.01489500000  | -2.86552400000 |
| C | 3.72016900000  | -5.08457500000 | 1.20705600000  |
| C | -5.27134400000 | -0.12440200000 | 3.39154600000  |
| C | 6.18344500000  | 2.36672200000  | -0.51038500000 |
| H | -6.02027400000 | 0.40114600000  | 3.97089000000  |
| H | 6.27046000000  | 1.30850500000  | -0.34221500000 |
| C | 4.33583700000  | -0.89999200000 | -1.60240800000 |
| C | -1.41486800000 | 2.57517500000  | 5.59749900000  |
| C | 5.42757600000  | -1.41632000000 | -0.89368500000 |
| C | -2.64065400000 | 2.93185000000  | 4.99495500000  |
| C | 5.50129500000  | -1.32336500000 | 0.50310600000  |
| C | -2.62575100000 | 3.57645500000  | 3.73817700000  |
| C | -3.13860400000 | 2.16352400000  | -2.24072000000 |
| C | 2.75472400000  | -4.10323800000 | 0.94944900000  |
| H | -3.04840200000 | 2.15071700000  | -1.16830100000 |
| H | 3.05894100000  | -3.07765800000 | 0.85478800000  |
| C | -1.97778500000 | 2.28744300000  | -3.00598300000 |
| C | 1.40589400000  | -4.46057000000 | 0.79930100000  |
| H | -1.01950600000 | 2.31119400000  | -2.51613800000 |
| H | 0.66078100000  | -3.70439900000 | 0.60435700000  |
| C | -0.69180800000 | 9.30218400000  | -1.97243300000 |
| C | -0.97167200000 | -4.70649900000 | -2.20575200000 |
| H | -0.02141800000 | 10.12978600000 | -1.65664900000 |
| H | -2.01938600000 | -4.42408100000 | -1.98171100000 |
| H | -1.00825900000 | 9.49892700000  | -3.02177100000 |
| H | -0.78349500000 | -5.67800800000 | -1.69973900000 |
| H | -0.10552400000 | 8.35987700000  | -1.94299500000 |
| H | -0.30779300000 | -3.94477400000 | -1.74923700000 |
| C | 4.22750800000  | -1.02830900000 | -3.10117500000 |
| C | -1.34736200000 | 1.82019800000  | 6.90008100000  |
| H | -3.25369900000 | 10.62225600000 | -2.53104100000 |
| H | -0.94847100000 | -7.30036400000 | -3.43859100000 |
| H | 3.65232900000  | -0.20435400000 | -3.52358600000 |
| H | -0.82949800000 | 0.84859300000  | 6.74607300000  |
| H | 3.68793200000  | -1.94657900000 | -3.36011600000 |
| H | -0.79035400000 | 2.41527800000  | 7.65407300000  |
| C | 6.74823900000  | -1.77946100000 | 1.21832900000  |
| C | -3.89298300000 | 3.90348400000  | 2.99303500000  |
| H | 6.58906300000  | -1.81763800000 | 2.29936500000  |
| H | -3.88043800000 | 3.41843100000  | 1.99476100000  |
| H | 7.58283500000  | -1.09825800000 | 1.01445100000  |
| H | -4.79005400000 | 3.52463600000  | 3.52649500000  |
| H | 7.07500100000  | -2.76701800000 | 0.88081900000  |
| H | -3.99608700000 | 5.00062700000  | 2.86386000000  |

|   |                 |                 |                 |
|---|-----------------|-----------------|-----------------|
| C | 5.702310000000  | 5.115631000000  | 7.027615000000  |
| C | -2.289059000000 | -1.381917000000 | -3.638684000000 |
| H | 4.700245000000  | 5.571256000000  | 6.851978000000  |
| H | -1.625991000000 | -0.519375000000 | -3.870626000000 |
| H | 6.245272000000  | 5.136951000000  | 6.055349000000  |
| H | -2.073906000000 | -1.665910000000 | -2.583566000000 |
| H | 6.246371000000  | 5.756695000000  | 7.751131000000  |
| H | -2.008423000000 | -2.203935000000 | -4.328727000000 |
| C | -2.748123000000 | 8.236338000000  | -1.426912000000 |
| C | 0.555635000000  | -5.137945000000 | -3.966118000000 |
| C | 6.080268000000  | 2.758551000000  | 6.807675000000  |
| C | -4.664492000000 | -1.916690000000 | -3.436368000000 |
| C | -3.314878000000 | -1.553905000000 | 1.981860000000  |
| C | 5.953672000000  | 5.060059000000  | -0.776658000000 |
| C | -4.449864000000 | 2.045920000000  | -4.262288000000 |
| O | -5.591211000000 | 1.824131000000  | -2.154753000000 |
| O | 5.066599000000  | -4.665495000000 | 1.335044000000  |
| C | 3.312937000000  | -6.375733000000 | 1.297149000000  |
| C | -5.594511000000 | -0.756328000000 | 2.184829000000  |
| C | 6.849465000000  | 2.976197000000  | -1.526843000000 |
| O | 6.480722000000  | -1.996739000000 | -1.569847000000 |
| O | -3.861756000000 | 2.634112000000  | 5.630707000000  |
| C | -2.041996000000 | 2.314323000000  | -4.406572000000 |
| C | 1.031600000000  | -5.747011000000 | 0.927333000000  |
| H | 5.202768000000  | -1.068697000000 | -3.591000000000 |
| H | -2.359885000000 | 1.599422000000  | 7.297068000000  |
| C | -2.646690000000 | 6.943295000000  | -0.856621000000 |
| C | -3.853627000000 | 8.548202000000  | -2.255070000000 |
| C | 1.025434000000  | -6.465365000000 | -3.807412000000 |
| C | 1.442203000000  | -4.148393000000 | -4.449612000000 |
| C | 5.257605000000  | 1.810535000000  | 6.318717000000  |
| C | 7.411449000000  | 2.659987000000  | 6.608533000000  |
| C | -4.471653000000 | -3.253665000000 | -3.358007000000 |
| C | -5.939309000000 | -1.411893000000 | -3.165656000000 |
| H | -2.569363000000 | -2.132669000000 | 1.448577000000  |
| C | -4.620016000000 | -1.507554000000 | 1.512308000000  |
| C | 6.746121000000  | 4.308477000000  | -1.660629000000 |
| H | 5.884524000000  | 6.125612000000  | -0.894529000000 |
| C | -3.283777000000 | 2.183455000000  | -5.030079000000 |
| H | -5.409455000000 | 1.928799000000  | -4.742985000000 |
| C | -5.498995000000 | 1.354761000000  | -0.798895000000 |
| C | 6.085844000000  | -5.671961000000 | 1.436843000000  |
| H | 4.011165000000  | -7.177409000000 | 1.476945000000  |
| C | 1.954374000000  | -6.702700000000 | 1.138501000000  |
| O | -6.823229000000 | -0.700134000000 | 1.603982000000  |
| O | 7.675843000000  | 2.300432000000  | -2.454347000000 |



|   |                 |                 |                 |
|---|-----------------|-----------------|-----------------|
| C | 6.205419000000  | -3.331467000000 | -1.983135000000 |
| C | -4.337785000000 | 3.701278000000  | 6.457211000000  |
| O | -0.880683000000 | 2.390825000000  | -5.192773000000 |
| O | -0.295403000000 | -6.135891000000 | 0.725872000000  |
| C | -1.544429000000 | 6.573415000000  | 0.100329000000  |
| C | -3.630838000000 | 5.983208000000  | -1.132539000000 |
| C | -4.828346000000 | 7.573432000000  | -2.506855000000 |
| C | -4.041783000000 | 9.914234000000  | -2.863660000000 |
| C | 0.119912000000  | -7.607265000000 | -3.421703000000 |
| C | 2.385409000000  | -6.731554000000 | -4.013691000000 |
| C | 2.788267000000  | -4.478541000000 | -4.683537000000 |
| C | 0.976205000000  | -2.732107000000 | -4.665570000000 |
| C | 5.747501000000  | 0.770017000000  | 5.600733000000  |
| H | 4.194517000000  | 1.907877000000  | 6.501859000000  |
| C | 7.922632000000  | 1.577468000000  | 5.868621000000  |
| H | 8.076402000000  | 3.402032000000  | 7.029364000000  |
| H | -3.523203000000 | -3.697582000000 | -3.614445000000 |
| C | -5.527995000000 | -4.101354000000 | -2.970059000000 |
| H | -6.115027000000 | -0.350178000000 | -3.260620000000 |
| C | -6.974430000000 | -2.277716000000 | -2.775644000000 |
| H | -4.882224000000 | -2.021735000000 | 0.595894000000  |
| H | 7.273655000000  | 4.791877000000  | -2.470440000000 |
| H | -3.332654000000 | 2.194453000000  | -6.110289000000 |
| H | -4.870582000000 | 0.438418000000  | -0.730378000000 |
| H | -6.512681000000 | 1.096355000000  | -0.420079000000 |
| H | -5.097383000000 | 2.137891000000  | -0.119279000000 |
| H | 7.086557000000  | -5.190417000000 | 1.445989000000  |
| H | 5.984608000000  | -6.247446000000 | 2.382877000000  |
| H | 6.065182000000  | -6.360631000000 | 0.558753000000  |
| H | 1.632794000000  | -7.732886000000 | 1.201954000000  |
| C | -7.761474000000 | 0.214729000000  | 2.148187000000  |
| C | 7.687242000000  | 0.869460000000  | -2.455072000000 |
| H | 6.001422000000  | -3.971101000000 | -1.117187000000 |
| H | 7.094929000000  | -3.686749000000 | -2.496379000000 |
| H | 5.353810000000  | -3.380358000000 | -2.670411000000 |
| H | -3.612195000000 | 3.933988000000  | 7.269561000000  |
| H | -5.296959000000 | 3.399873000000  | 6.929922000000  |
| H | -4.524620000000 | 4.621733000000  | 5.859049000000  |
| C | 0.090004000000  | 3.293932000000  | -4.716899000000 |
| C | -1.337162000000 | -5.660612000000 | 1.567298000000  |
| H | -1.990466000000 | 6.348270000000  | 1.088943000000  |
| H | -0.832623000000 | 7.410830000000  | 0.245746000000  |
| H | -0.987699000000 | 5.688681000000  | -0.277957000000 |
| H | -3.555092000000 | 4.998058000000  | -0.687819000000 |
| C | -4.733667000000 | 6.293418000000  | -1.940835000000 |
| H | -5.681044000000 | 7.824320000000  | -3.127176000000 |

|   |                 |                 |                 |
|---|-----------------|-----------------|-----------------|
| H | -5.023389000000 | 10.333062000000 | -2.558037000000 |
| H | -4.004357000000 | 9.835930000000  | -3.971594000000 |
| H | 0.375991000000  | -7.964921000000 | -2.401367000000 |
| H | 0.233610000000  | -8.442881000000 | -4.143855000000 |
| H | 2.772903000000  | -7.725929000000 | -3.824387000000 |
| C | 3.261621000000  | -5.714403000000 | -4.427705000000 |
| H | 3.471542000000  | -3.714782000000 | -5.032513000000 |
| H | 0.122440000000  | -2.728416000000 | -5.372893000000 |
| H | 0.652152000000  | -2.290091000000 | -3.697342000000 |
| H | 1.767952000000  | -2.080033000000 | -5.091012000000 |
| H | 5.082434000000  | 0.020135000000  | 5.193548000000  |
| C | 7.069093000000  | 0.654404000000  | 5.354898000000  |
| H | 8.989535000000  | 1.487987000000  | 5.719951000000  |
| C | -6.748882000000 | -3.614931000000 | -2.677038000000 |
| H | -5.371393000000 | -5.170319000000 | -2.901416000000 |
| H | -7.945890000000 | -1.854064000000 | -2.569546000000 |
| H | -8.082095000000 | -0.072200000000 | 3.157349000000  |
| H | -8.618557000000 | 0.184231000000  | 1.481936000000  |
| H | -7.352801000000 | 1.231312000000  | 2.177119000000  |
| H | 8.335279000000  | 0.513122000000  | -3.281371000000 |
| H | 8.099033000000  | 0.462010000000  | -1.506329000000 |
| H | 6.668496000000  | 0.475844000000  | -2.634147000000 |
| C | -0.247063000000 | 4.717685000000  | -4.536175000000 |
| C | 1.421009000000  | 2.893978000000  | -4.487559000000 |
| C | -1.185457000000 | -5.077305000000 | 2.868450000000  |
| C | -2.644425000000 | -5.877137000000 | 1.114083000000  |
| C | -5.841586000000 | 5.313338000000  | -2.108617000000 |
| C | 4.724557000000  | -5.972596000000 | -4.494277000000 |
| O | 7.509500000000  | -0.452949000000 | 4.602816000000  |
| O | -7.736073000000 | -4.550851000000 | -2.306660000000 |
| N | -1.441221000000 | 5.245930000000  | -4.855748000000 |
| C | 0.641316000000  | 5.580253000000  | -4.078463000000 |
| C | 2.394727000000  | 3.877861000000  | -3.905461000000 |
| C | -2.288017000000 | -4.763334000000 | 3.613886000000  |
| C | -3.697270000000 | -5.582907000000 | 1.863776000000  |
| N | -2.933165000000 | -6.414375000000 | -0.086441000000 |
| C | -6.487196000000 | 4.744919000000  | -0.901534000000 |
| C | -6.334255000000 | 4.982096000000  | -3.329867000000 |
| C | 5.425425000000  | -6.360598000000 | -3.381592000000 |
| C | 5.416791000000  | -5.782110000000 | -5.706418000000 |
| C | 8.650644000000  | -0.281429000000 | 3.785357000000  |
| C | -8.953226000000 | -4.059758000000 | -1.803935000000 |
| N | 0.207145000000  | 6.850574000000  | -4.002702000000 |
| C | 2.006098000000  | 5.165793000000  | -3.688997000000 |
| C | -3.549541000000 | -5.033515000000 | 3.150929000000  |
| N | -4.885099000000 | -5.882885000000 | 1.307164000000  |

|   |                  |                 |                 |
|---|------------------|-----------------|-----------------|
| N | -6.060601000000  | 5.000285000000  | 0.349755000000  |
| C | -7.537384000000  | 3.937602000000  | -0.977528000000 |
| C | -7.518227000000  | 4.080694000000  | -3.450076000000 |
| C | 6.775611000000   | -6.545930000000 | -3.443193000000 |
| C | 6.731101000000   | -5.949555000000 | -5.783891000000 |
| N | 4.827380000000   | -5.401932000000 | -6.854341000000 |
| C | 9.642759000000   | -1.195404000000 | 3.863587000000  |
| C | 8.759061000000   | 0.746508000000  | 2.886010000000  |
| C | -9.155763000000  | -3.882644000000 | -0.416469000000 |
| C | -10.024303000000 | -3.819563000000 | -2.667062000000 |
| C | 2.830721000000   | 6.150309000000  | -2.946969000000 |
| C | -4.750032000000  | -4.834523000000 | 4.013873000000  |
| N | -7.982760000000  | 3.490294000000  | 0.213468000000  |
| C | -8.123500000000  | 3.554915000000  | -2.295079000000 |
| C | 7.476516000000   | -6.304992000000 | -4.655836000000 |
| N | 7.269480000000   | -5.699889000000 | -6.990643000000 |
| N | 9.598024000000   | -2.268629000000 | 4.674691000000  |
| C | 10.748555000000  | -1.100311000000 | 3.127187000000  |
| C | 9.944018000000   | 0.887875000000  | 2.113666000000  |
| C | -10.366172000000 | -3.457599000000 | 0.050966000000  |
| C | -11.189630000000 | -3.396166000000 | -2.198684000000 |
| N | -9.959782000000  | -3.966040000000 | -4.002206000000 |
| C | 2.384159000000   | 6.615515000000  | -1.702333000000 |
| C | 3.947425000000   | 6.748767000000  | -3.542819000000 |
| C | -4.794366000000  | -5.426597000000 | 5.289325000000  |
| C | -5.793320000000  | -4.096424000000 | 3.582092000000  |
| O | -9.107747000000  | 2.551902000000  | -2.453588000000 |
| O | 8.883243000000   | -6.371668000000 | -4.743968000000 |
| N | 11.635289000000  | -2.097200000000 | 3.301407000000  |
| C | 10.935204000000  | -0.039185000000 | 2.225956000000  |
| C | -11.394221000000 | -3.189714000000 | -0.817130000000 |
| N | -12.129830000000 | -3.186132000000 | -3.138368000000 |
| H | 1.494080000000   | 6.182752000000  | -1.262023000000 |
| C | 3.050659000000   | 7.651333000000  | -1.036476000000 |
| H | 4.266301000000   | 6.421368000000  | -4.525910000000 |
| C | 4.643220000000   | 7.778557000000  | -2.891053000000 |
| C | -5.881928000000  | -5.213347000000 | 6.144060000000  |
| H | -3.971244000000  | -6.048775000000 | 5.621754000000  |
| C | -6.903573000000  | -3.843573000000 | 4.406939000000  |
| H | -5.778381000000  | -3.692536000000 | 2.579497000000  |
| C | -9.960622000000  | 2.298488000000  | -1.380490000000 |
| C | 9.564465000000   | -5.516553000000 | -3.865483000000 |
| C | 12.150176000000  | 0.008704000000  | 1.377486000000  |
| C | -12.693939000000 | -2.636669000000 | -0.345219000000 |
| C | 2.487363000000   | 8.139961000000  | 0.273796000000  |
| C | 4.206520000000   | 8.224368000000  | -1.618826000000 |

|   |                  |                 |                 |
|---|------------------|-----------------|-----------------|
| C | 5.834026000000   | 8.386154000000  | -3.584801000000 |
| C | -5.888794000000  | -5.898551000000 | 7.485902000000  |
| C | -6.934170000000  | -4.373481000000 | 5.714727000000  |
| C | -8.052605000000  | -3.022290000000 | 3.886247000000  |
| C | -10.039409000000 | 1.000113000000  | -0.883426000000 |
| C | -10.794860000000 | 3.294046000000  | -0.854084000000 |
| C | 10.484899000000  | -6.037393000000 | -3.034074000000 |
| C | 9.316023000000   | -4.188399000000 | -3.852887000000 |
| C | 12.035721000000  | -0.022979000000 | -0.018896000000 |
| C | 13.420362000000  | 0.050881000000  | 1.965670000000  |
| C | -13.450925000000 | -3.322559000000 | 0.619299000000  |
| C | -13.156658000000 | -1.478007000000 | -0.861529000000 |
| H | 1.426483000000   | 8.435803000000  | 0.150565000000  |
| H | 3.039119000000   | 9.028527000000  | 0.648597000000  |
| H | 2.565589000000   | 7.340782000000  | 1.038757000000  |
| O | 4.883702000000   | 9.269599000000  | -0.963108000000 |
| H | 5.524897000000   | 8.802920000000  | -4.566525000000 |
| H | 6.271356000000   | 9.215960000000  | -2.988207000000 |
| H | 6.614817000000   | 7.613183000000  | -3.744043000000 |
| H | -5.045390000000  | -5.524045000000 | 8.103834000000  |
| H | -6.842448000000  | -5.719494000000 | 8.026909000000  |
| H | -5.783235000000  | -6.995262000000 | 7.347784000000  |
| O | -8.014927000000  | -4.081500000000 | 6.566143000000  |
| H | -8.976490000000  | -3.642110000000 | 3.874200000000  |
| H | -8.222390000000  | -2.138846000000 | 4.529359000000  |
| H | -7.890771000000  | -2.672384000000 | 2.843658000000  |
| H | -9.416195000000  | 0.231393000000  | -1.320843000000 |
| C | -10.895062000000 | 0.703710000000  | 0.181688000000  |
| H | -10.762231000000 | 4.290939000000  | -1.271852000000 |
| C | -11.656760000000 | 2.994736000000  | 0.212357000000  |
| C | 11.145854000000  | -5.230994000000 | -2.086509000000 |
| H | 10.665958000000  | -7.103749000000 | -3.068789000000 |
| C | 9.966813000000   | -3.356705000000 | -2.925702000000 |
| H | 8.604917000000   | -3.766987000000 | -4.551277000000 |
| H | 11.055011000000  | -0.093420000000 | -0.474828000000 |
| C | 13.173914000000  | 0.009891000000  | -0.833028000000 |
| H | 13.508915000000  | 0.054390000000  | 3.046027000000  |
| C | 14.574877000000  | 0.093336000000  | 1.173388000000  |
| C | -14.652227000000 | -2.787207000000 | 1.102258000000  |
| H | -13.104098000000 | -4.277997000000 | 0.995541000000  |
| C | -14.361586000000 | -0.908159000000 | -0.424021000000 |
| H | -12.585709000000 | -0.965684000000 | -1.628465000000 |
| C | 5.843909000000   | 8.821850000000  | 0.001743000000  |
| C | -7.757012000000  | -2.990786000000 | 7.455901000000  |
| C | -11.700780000000 | 1.705979000000  | 0.754286000000  |
| H | -10.932908000000 | -0.306206000000 | 0.540142000000  |

|   |                  |                 |                 |
|---|------------------|-----------------|-----------------|
| H | -12.288789000000 | 3.761726000000  | 0.638839000000  |
| H | 11.848584000000  | -5.701440000000 | -1.417089000000 |
| C | 10.879243000000  | -3.902750000000 | -2.015378000000 |
| H | 9.751361000000   | -2.297799000000 | -2.886213000000 |
| C | 12.985680000000  | -0.085139000000 | -2.324752000000 |
| C | 14.454544000000  | 0.105804000000  | -0.237728000000 |
| C | 15.913679000000  | 0.117171000000  | 1.863905000000  |
| C | -15.416272000000 | -3.557384000000 | 2.146527000000  |
| C | -15.101905000000 | -1.545529000000 | 0.598913000000  |
| C | -14.820000000000 | 0.375685000000  | -1.064289000000 |
| H | 5.390700000000   | 8.132730000000  | 0.754195000000  |
| H | 6.247962000000   | 9.700033000000  | 0.550202000000  |
| H | 6.698625000000   | 8.316636000000  | -0.497029000000 |
| H | -6.895145000000  | -3.209540000000 | 8.124618000000  |
| H | -8.652476000000  | -2.821713000000 | 8.091885000000  |
| H | -7.553268000000  | -2.054977000000 | 6.890966000000  |
| O | -12.581997000000 | 1.474676000000  | 1.829645000000  |
| O | 11.468364000000  | -3.024021000000 | -1.080263000000 |
| H | 12.449779000000  | -1.027759000000 | -2.568342000000 |
| H | 13.960031000000  | -0.106514000000 | -2.857083000000 |
| H | 12.394847000000  | 0.781965000000  | -2.687544000000 |
| O | 15.604849000000  | 0.189765000000  | -1.043082000000 |
| H | 16.011914000000  | -0.770047000000 | 2.524438000000  |
| H | 16.748413000000  | 0.086654000000  | 1.130729000000  |
| H | 16.008592000000  | 1.040992000000  | 2.471940000000  |
| H | -14.797395000000 | -3.667921000000 | 3.062069000000  |
| H | -16.364503000000 | -3.043690000000 | 2.415482000000  |
| H | -15.674718000000 | -4.564353000000 | 1.756325000000  |
| O | -16.267593000000 | -0.949198000000 | 1.112380000000  |
| H | -15.827174000000 | 0.671609000000  | -0.700770000000 |
| H | -14.104736000000 | 1.190574000000  | -0.829074000000 |
| H | -14.883545000000 | 0.245349000000  | -2.165328000000 |
| C | -12.383564000000 | 0.292054000000  | 2.618018000000  |
| C | 12.223578000000  | -3.583559000000 | 0.003645000000  |
| C | 15.957220000000  | 1.535554000000  | -1.379546000000 |
| C | -16.006308000000 | -0.029842000000 | 2.178304000000  |
| H | -13.064236000000 | 0.319384000000  | 3.493645000000  |
| H | -11.341951000000 | 0.234549000000  | 3.005722000000  |
| H | -12.618383000000 | -0.631064000000 | 2.044508000000  |
| H | 12.552103000000  | -2.771813000000 | 0.685856000000  |
| H | 11.600746000000  | -4.282072000000 | 0.607375000000  |
| H | 13.141628000000  | -4.088646000000 | -0.367601000000 |
| H | 15.142118000000  | 2.033544000000  | -1.951435000000 |
| H | 16.868017000000  | 1.526576000000  | -2.016330000000 |
| H | 16.180856000000  | 2.130875000000  | -0.466033000000 |
| H | -15.550213000000 | -0.551830000000 | 3.047925000000  |

|   |                  |                 |                 |
|---|------------------|-----------------|-----------------|
| H | -16.964332000000 | 0.422644000000  | 2.513368000000  |
| H | -15.332823000000 | 0.796339000000  | 1.849804000000  |
| S | 11.058950000000  | -3.271032000000 | 4.505498000000  |
| S | -7.040431000000  | 4.153494000000  | 1.562813000000  |
| S | -1.475344000000  | 6.995936000000  | -4.554475000000 |
| S | -4.687165000000  | -6.575261000000 | -0.318490000000 |
| S | 6.018645000000   | -5.226455000000 | -8.164278000000 |
| S | -11.508471000000 | -3.541352000000 | -4.767201000000 |
| O | 7.695437000000   | -6.029241000000 | -1.334201000000 |
| O | 8.234117000000   | -7.990751000000 | -2.272897000000 |
| O | 4.845135000000   | -7.656200000000 | -1.474957000000 |
| O | 3.981862000000   | -5.648044000000 | -1.693252000000 |
| O | -8.153608000000  | -4.915097000000 | 1.414426000000  |
| O | -6.961097000000  | -3.411665000000 | 0.337692000000  |
| O | -10.972872000000 | -4.176090000000 | 2.229405000000  |
| O | -10.274478000000 | -2.061447000000 | 1.969012000000  |
| O | 0.539411000000   | -3.584379000000 | 3.490943000000  |
| O | 0.855815000000   | -5.785903000000 | 3.839301000000  |
| O | -1.497468000000  | -4.834109000000 | 5.842058000000  |
| O | -2.820693000000  | -3.127049000000 | 5.251640000000  |
| O | 5.512178000000   | 5.472268000000  | 3.671100000000  |
| O | 3.943442000000   | 6.776160000000  | 4.594338000000  |
| O | 0.875533000000   | 5.650322000000  | 5.561800000000  |
| O | 2.615229000000   | 4.318588000000  | 6.043349000000  |
| O | 9.265576000000   | 2.032976000000  | 0.171408000000  |
| O | 11.138678000000  | 2.716073000000  | 1.192863000000  |
| O | 3.791322000000   | 2.256162000000  | -2.738131000000 |
| O | 4.720890000000   | 3.992718000000  | -3.848167000000 |
| O | 7.867101000000   | 2.941915000000  | 2.782380000000  |
| O | 6.455897000000   | 1.215611000000  | 2.541720000000  |
| O | -6.455140000000  | 6.387256000000  | -5.298144000000 |
| O | -4.521712000000  | 5.350868000000  | -4.733264000000 |
| O | -7.158291000000  | 3.411257000000  | -5.768764000000 |
| O | -9.252384000000  | 3.683622000000  | -4.955846000000 |
| O | 3.035058000000   | 1.363890000000  | -5.476008000000 |
| O | 1.103804000000   | 0.581203000000  | -4.598102000000 |
| N | 4.748115000000   | -6.533697000000 | -2.123529000000 |
| N | 7.501269000000   | -6.916706000000 | -2.265499000000 |
| N | -10.534013000000 | -3.227424000000 | 1.457570000000  |
| N | -8.058176000000  | -4.096877000000 | 0.478171000000  |
| N | 7.669387000000   | 1.660653000000  | 2.691633000000  |
| N | 10.066679000000  | 1.978583000000  | 1.191809000000  |
| N | 1.907034000000   | 4.964150000000  | 5.164316000000  |
| N | 4.255330000000   | 5.743134000000  | 3.867436000000  |
| N | -8.022604000000  | 3.722680000000  | -4.745344000000 |
| N | -5.741142000000  | 5.506187000000  | -4.521800000000 |

|   |                 |                 |                 |
|---|-----------------|-----------------|-----------------|
| N | 1.842309000000  | 1.563261000000  | -4.821467000000 |
| N | 3.682141000000  | 3.417170000000  | -3.466804000000 |
| N | -2.111590000000 | -4.164824000000 | 4.911438000000  |
| N | 0.109523000000  | -4.810058000000 | 3.412180000000  |
| N | -1.747326000000 | 0.264964000000  | 0.628849000000  |
| N | 0.543470000000  | -0.591561000000 | -0.773885000000 |
| O | -2.065323000000 | -0.355822000000 | -0.379005000000 |
| O | -2.346309000000 | 1.226586000000  | 1.101498000000  |
| O | 0.280750000000  | 0.291518000000  | -1.577597000000 |
| O | 0.701467000000  | -1.772475000000 | -1.037050000000 |

CAB:

|   |                 |                 |                 |
|---|-----------------|-----------------|-----------------|
| S | 1.452657000000  | -4.331618000000 | -4.941617000000 |
| S | -0.500702000000 | -1.016013000000 | 2.837553000000  |
| O | -2.291334000000 | -2.536415000000 | -3.731894000000 |
| O | 3.724290000000  | -1.738750000000 | 1.364317000000  |
| O | -1.408685000000 | -4.288851000000 | 7.628274000000  |
| O | 1.577129000000  | 5.331985000000  | -2.482234000000 |
| N | 2.264413000000  | -3.386656000000 | -3.869170000000 |
| N | -0.927278000000 | -2.456474000000 | 2.034262000000  |
| O | 4.046744000000  | -6.586311000000 | -0.381264000000 |
| O | -2.428290000000 | 2.583031000000  | -0.547141000000 |
| N | -0.078604000000 | -3.806905000000 | -4.666062000000 |
| N | 1.177260000000  | -1.191586000000 | 2.571713000000  |
| C | 1.364575000000  | -2.623032000000 | -3.244725000000 |
| C | 0.170709000000  | -2.874436000000 | 1.375770000000  |
| C | 0.012866000000  | -2.884429000000 | -3.710838000000 |
| C | 1.337202000000  | -2.179321000000 | 1.672744000000  |
| C | 1.637252000000  | -1.567369000000 | -2.282922000000 |
| C | 0.201267000000  | -3.909386000000 | 0.445111000000  |
| C | 0.491965000000  | -1.069756000000 | -1.676311000000 |
| C | 1.378755000000  | -4.219730000000 | -0.159063000000 |
| C | -1.129408000000 | -2.277500000000 | -3.082320000000 |
| C | 2.545136000000  | -2.518603000000 | 1.040606000000  |
| C | -0.864828000000 | -1.540377000000 | -1.939920000000 |
| C | 2.518584000000  | -3.550583000000 | 0.095440000000  |
| C | 2.990925000000  | -0.933325000000 | -2.168015000000 |
| C | -1.068479000000 | -4.690598000000 | 0.064473000000  |
| C | 3.978297000000  | -1.131722000000 | -3.154605000000 |
| C | -2.091442000000 | -4.841627000000 | 0.944958000000  |
| H | 3.833424000000  | -1.889104000000 | -3.911696000000 |
| H | -2.031671000000 | -4.401866000000 | 1.918108000000  |
| C | -3.569939000000 | -2.171904000000 | -3.312786000000 |
| C | 5.004742000000  | -2.345384000000 | 1.061300000000  |
| C | 3.291216000000  | 0.014707000000  | -1.171884000000 |
| C | -1.146481000000 | -5.244765000000 | -1.226396000000 |

|   |                 |                 |                 |
|---|-----------------|-----------------|-----------------|
| H | 2.652979000000  | 0.126845000000  | -0.307898000000 |
| H | -0.317651000000 | -5.160149000000 | -1.903062000000 |
| C | -4.549154000000 | -3.153541000000 | -3.425279000000 |
| C | 5.880695000000  | -1.336597000000 | 0.927310000000  |
| H | -4.349726000000 | -4.057258000000 | -3.979228000000 |
| H | 5.561400000000  | -0.326686000000 | 0.964177000000  |
| C | -5.672655000000 | 0.591701000000  | 3.237259000000  |
| C | 2.313577000000  | 1.591140000000  | -5.478822000000 |
| C | -5.791533000000 | -2.982105000000 | -2.823555000000 |
| C | 7.231764000000  | -1.646492000000 | 0.723709000000  |
| H | -6.523289000000 | -3.778592000000 | -2.885332000000 |
| H | 7.902844000000  | -0.919003000000 | 0.316296000000  |
| C | 4.396893000000  | 0.860303000000  | -1.242252000000 |
| C | -2.318307000000 | -5.880678000000 | -1.640135000000 |
| C | 5.304470000000  | 0.681565000000  | -2.294814000000 |
| C | -3.344557000000 | -6.093652000000 | -0.717755000000 |
| C | 5.138062000000  | -0.357216000000 | -3.219920000000 |
| C | -3.226440000000 | -5.584791000000 | 0.581347000000  |
| C | -4.308420000000 | 0.515255000000  | 2.897964000000  |
| C | 1.430730000000  | 0.778289000000  | -4.778979000000 |
| H | -3.948127000000 | -0.312664000000 | 2.322821000000  |
| H | 1.756652000000  | -0.167660000000 | -4.405028000000 |
| C | -3.414025000000 | 1.519710000000  | 3.326673000000  |
| C | 0.097726000000  | 1.223731000000  | -4.574302000000 |
| H | -2.370787000000 | 1.440658000000  | 3.095307000000  |
| H | -0.493655000000 | 0.872831000000  | -3.748699000000 |
| C | -0.317957000000 | -3.370003000000 | 7.805852000000  |
| C | 1.858424000000  | 3.936526000000  | -2.340710000000 |
| H | 0.577816000000  | -3.918661000000 | 8.017943000000  |
| H | 0.996744000000  | 3.363950000000  | -2.616998000000 |
| H | -0.533938000000 | -2.711790000000 | 8.621101000000  |
| H | 2.676443000000  | 3.676241000000  | -2.977732000000 |
| H | -0.180943000000 | -2.797698000000 | 6.911621000000  |
| H | 2.113204000000  | 3.727219000000  | -1.325033000000 |
| C | 4.611546000000  | 1.943503000000  | -0.210524000000 |
| C | -2.473411000000 | -6.360622000000 | -3.093747000000 |
| H | -2.634461000000 | -4.537857000000 | 9.825150000000  |
| H | 2.960349000000  | 4.947204000000  | -4.489954000000 |
| H | 4.024853000000  | 1.744838000000  | 0.692195000000  |
| H | -2.896201000000 | -5.569119000000 | -3.683556000000 |
| H | 4.303925000000  | 2.926849000000  | -0.587363000000 |
| H | -1.517285000000 | -6.624195000000 | -3.489566000000 |
| C | 6.187770000000  | -0.614617000000 | -4.273996000000 |
| C | -4.325900000000 | -5.861973000000 | 1.621973000000  |
| H | 5.896636000000  | -1.451187000000 | -4.916044000000 |
| H | -4.341025000000 | -5.074257000000 | 2.348113000000  |



|   |                 |                 |                 |
|---|-----------------|-----------------|-----------------|
| H | 7.154247000000  | -0.853755000000 | -3.815426000000 |
| H | -5.275476000000 | -5.910130000000 | 1.132395000000  |
| H | 6.353216000000  | 0.260112000000  | -4.913466000000 |
| H | -4.125960000000 | -6.792077000000 | 2.109725000000  |
| C | 3.371224000000  | -7.471606000000 | 0.528147000000  |
| C | -1.787693000000 | 3.481379000000  | -1.473240000000 |
| H | 2.361763000000  | -7.138749000000 | 0.666714000000  |
| H | -0.792655000000 | 3.138566000000  | -1.664782000000 |
| H | 3.875433000000  | -7.477421000000 | 1.470103000000  |
| H | -2.333871000000 | 3.520847000000  | -2.391816000000 |
| H | 3.364299000000  | -8.462233000000 | 0.121061000000  |
| H | -1.748031000000 | 4.464481000000  | -1.044549000000 |
| C | -2.628062000000 | -3.585435000000 | 7.340693000000  |
| C | 2.740786000000  | 6.058960000000  | -2.084793000000 |
| C | 5.428915000000  | -6.955868000000 | -0.539981000000 |
| C | -3.768284000000 | 3.006984000000  | -0.259481000000 |
| C | -3.908131000000 | -0.912954000000 | -2.814774000000 |
| C | 5.438396000000  | -3.241859000000 | 1.980147000000  |
| C | -6.152711000000 | 1.717533000000  | 3.914973000000  |
| O | -6.569220000000 | -0.484846000000 | 2.905824000000  |
| O | 3.651654000000  | 1.180384000000  | -5.780143000000 |
| C | 1.887513000000  | 2.825079000000  | -5.834266000000 |
| C | -6.048271000000 | -1.811732000000 | -2.104819000000 |
| C | 7.655082000000  | -2.878973000000 | 1.076551000000  |
| O | 6.420958000000  | 1.495007000000  | -2.387216000000 |
| O | -4.508046000000 | -6.820030000000 | -1.114885000000 |
| C | -3.896691000000 | 2.625426000000  | 4.055226000000  |
| C | -0.341467000000 | 2.125333000000  | -5.495892000000 |
| H | 5.666951000000  | 2.025857000000  | 0.067281000000  |
| H | -3.121723000000 | -7.208225000000 | -3.121637000000 |
| C | -2.985194000000 | -3.307143000000 | 6.012060000000  |
| C | -3.488264000000 | -3.191899000000 | 8.383668000000  |
| C | 3.766554000000  | 6.273086000000  | -3.007662000000 |
| C | 2.858386000000  | 6.568837000000  | -0.786598000000 |
| C | 6.322394000000  | -6.072795000000 | -1.078656000000 |
| C | 5.845870000000  | -8.182740000000 | -0.164368000000 |
| C | -4.194071000000 | 4.243869000000  | -0.595727000000 |
| C | -4.643747000000 | 2.186436000000  | 0.436181000000  |
| H | -3.201947000000 | -0.091241000000 | -2.834909000000 |
| C | -5.134323000000 | -0.751616000000 | -2.177075000000 |
| C | 6.776213000000  | -3.692615000000 | 1.772340000000  |
| H | 4.850171000000  | -3.599942000000 | 2.805181000000  |
| C | -5.270184000000 | 2.730884000000  | 4.316697000000  |
| H | -7.196576000000 | 1.804615000000  | 4.127861000000  |
| C | -6.513469000000 | -0.831091000000 | 1.517566000000  |
| C | 4.298139000000  | 2.087647000000  | -6.698506000000 |

|   |                 |                 |                 |
|---|-----------------|-----------------|-----------------|
| H | 2.559835000000  | 3.552031000000  | -6.237836000000 |
| C | 0.540589000000  | 3.130669000000  | -5.626405000000 |
| O | -7.142805000000 | -1.626593000000 | -1.316296000000 |
| O | 8.996269000000  | -3.289968000000 | 0.775685000000  |
| C | 6.196415000000  | 2.721465000000  | -3.083882000000 |
| C | -4.227225000000 | -8.216255000000 | -0.973517000000 |
| O | -3.016198000000 | 3.664124000000  | 4.534218000000  |
| O | -1.616451000000 | 2.726104000000  | -5.197845000000 |
| C | -2.039216000000 | -3.660151000000 | 4.847150000000  |
| C | -4.205508000000 | -2.681366000000 | 5.734608000000  |
| C | -4.619461000000 | -2.400928000000 | 8.107464000000  |
| C | -3.199897000000 | -3.626788000000 | 9.832979000000  |
| C | 3.611579000000  | 5.792775000000  | -4.461247000000 |
| C | 4.939695000000  | 6.906065000000  | -2.592903000000 |
| C | 3.994367000000  | 7.310139000000  | -0.422030000000 |
| C | 1.759370000000  | 6.290441000000  | 0.254855000000  |
| C | 7.632251000000  | -6.432283000000 | -1.280876000000 |
| H | 5.991685000000  | -5.090440000000 | -1.349411000000 |
| C | 7.174359000000  | -8.549237000000 | -0.369955000000 |
| H | 5.165375000000  | -8.872053000000 | 0.290536000000  |
| H | -3.525241000000 | 4.981837000000  | -0.993362000000 |
| C | -5.552001000000 | 4.521228000000  | -0.401343000000 |
| H | -4.307426000000 | 1.242349000000  | 0.818500000000  |
| C | -5.969634000000 | 2.618546000000  | 0.653294000000  |
| H | -5.362219000000 | 0.175452000000  | -1.668709000000 |
| H | 7.100074000000  | -4.637063000000 | 2.151253000000  |
| H | -5.646933000000 | 3.592222000000  | 4.825422000000  |
| H | -7.050131000000 | -0.097471000000 | 0.949026000000  |
| H | -6.964700000000 | -1.793300000000 | 1.374474000000  |
| H | -5.495604000000 | -0.861504000000 | 1.193198000000  |
| H | 5.297753000000  | 1.747671000000  | -6.888046000000 |
| H | 3.756969000000  | 2.129161000000  | -7.617443000000 |
| H | 4.336656000000  | 3.067588000000  | -6.262933000000 |
| H | 0.215242000000  | 4.143337000000  | -5.591640000000 |
| C | -8.004222000000 | -2.733875000000 | -1.095115000000 |
| C | 9.641975000000  | -2.381934000000 | -0.142468000000 |
| H | 5.886596000000  | 2.541245000000  | -4.121121000000 |
| H | 7.147639000000  | 3.258997000000  | -3.078578000000 |
| H | 5.431276000000  | 3.335456000000  | -2.592251000000 |
| H | -3.409041000000 | -8.477144000000 | -1.610457000000 |
| H | -5.089038000000 | -8.788325000000 | -1.249884000000 |
| H | -3.972307000000 | -8.426098000000 | 0.042226000000  |
| C | -1.714311000000 | 3.177299000000  | 4.916088000000  |
| C | -2.800021000000 | 1.950465000000  | -5.517665000000 |
| H | -2.618515000000 | -3.871497000000 | 3.972749000000  |
| H | -1.456677000000 | -4.518377000000 | 5.105561000000  |

|   |                 |                 |                 |
|---|-----------------|-----------------|-----------------|
| H | -1.387846000000 | -2.832008000000 | 4.652357000000  |
| H | -4.531416000000 | -2.571510000000 | 4.720486000000  |
| C | -4.992320000000 | -2.176591000000 | 6.774282000000  |
| H | -5.210146000000 | -2.004361000000 | 8.908367000000  |
| H | -4.130309000000 | -3.792276000000 | 10.340772000000 |
| H | -2.647184000000 | -2.867437000000 | 10.337012000000 |
| H | 4.567604000000  | 5.525759000000  | -4.855129000000 |
| H | 3.192208000000  | 6.585153000000  | -5.052068000000 |
| H | 5.768347000000  | 6.991036000000  | -3.270450000000 |
| C | 5.016632000000  | 7.463176000000  | -1.303069000000 |
| H | 4.052957000000  | 7.751155000000  | 0.550742000000  |
| H | 0.809204000000  | 6.242188000000  | -0.234082000000 |
| H | 1.959621000000  | 5.360440000000  | 0.742413000000  |
| H | 1.744345000000  | 7.078245000000  | 0.981017000000  |
| H | 8.317719000000  | -5.730955000000 | -1.717401000000 |
| C | 8.046955000000  | -7.688394000000 | -0.935370000000 |
| H | 7.512700000000  | -9.524365000000 | -0.081568000000 |
| C | -6.423147000000 | 3.513406000000  | -0.271414000000 |
| H | -5.888845000000 | 5.529938000000  | -0.367004000000 |
| H | -6.570213000000 | 2.258618000000  | 1.472890000000  |
| H | -8.519519000000 | -3.046635000000 | -2.012480000000 |
| H | -8.741945000000 | -2.388995000000 | -0.370543000000 |
| H | -7.455361000000 | -3.590130000000 | -0.681559000000 |
| H | 10.641436000000 | -2.721602000000 | -0.332523000000 |
| H | 9.100114000000  | -2.341040000000 | -1.061174000000 |
| H | 9.680099000000  | -1.401992000000 | 0.292694000000  |
| C | -1.510254000000 | 1.863390000000  | 5.684124000000  |
| C | -0.569148000000 | 3.928187000000  | 4.605813000000  |
| C | -2.826860000000 | 0.919828000000  | -6.460494000000 |
| C | -4.005620000000 | 2.289882000000  | -4.884151000000 |
| C | -6.257779000000 | -1.376347000000 | 6.402710000000  |
| C | 6.286977000000  | 8.241207000000  | -0.919871000000 |
| O | 9.375530000000  | -8.203932000000 | -1.132648000000 |
| O | -7.708333000000 | 4.092269000000  | 0.010523000000  |
| N | -2.498239000000 | 1.088294000000  | 6.171245000000  |
| C | -0.249893000000 | 1.391897000000  | 5.916309000000  |
| C | 0.850022000000  | 3.372449000000  | 4.853886000000  |
| C | -3.966258000000 | 0.249696000000  | -6.712580000000 |
| C | -5.172238000000 | 1.595295000000  | -5.179738000000 |
| N | -4.165237000000 | 3.278310000000  | -3.983834000000 |
| C | -7.243148000000 | -2.012723000000 | 5.404580000000  |
| C | -6.534595000000 | -0.127375000000 | 6.895990000000  |
| C | 7.460467000000  | 7.934842000000  | -1.526861000000 |
| C | 6.256321000000  | 9.279981000000  | 0.007706000000  |
| C | 10.494885000000 | -7.376601000000 | -0.781635000000 |
| C | -8.889249000000 | 3.330609000000  | -0.303843000000 |

|   |                  |                 |                 |
|---|------------------|-----------------|-----------------|
| N | -0.200355000000  | 0.235837000000  | 6.605746000000  |
| C | 1.007817000000   | 2.149703000000  | 5.441702000000  |
| C | -5.142825000000  | 0.559396000000  | -6.110137000000 |
| N | -6.271286000000  | 2.013209000000  | -4.521308000000 |
| N | -7.087816000000  | -3.247215000000 | 4.893110000000  |
| C | -8.377068000000  | -1.365395000000 | 5.000407000000  |
| C | -7.832129000000  | 0.599073000000  | 6.464194000000  |
| C | 8.603056000000   | 8.599912000000  | -1.270915000000 |
| C | 7.421898000000   | 9.972693000000  | 0.305400000000  |
| N | 5.157799000000   | 9.695951000000  | 0.667194000000  |
| C | 11.706207000000  | -7.698314000000 | -1.295748000000 |
| C | 10.402860000000  | -6.307380000000 | 0.066791000000  |
| C | -8.926646000000  | 2.297898000000  | -1.238068000000 |
| C | -10.095765000000 | 3.676182000000  | 0.338408000000  |
| C | 2.364595000000   | 1.437841000000  | 5.637525000000  |
| C | -6.413137000000  | -0.220398000000 | -6.491924000000 |
| N | -9.152053000000  | -2.063196000000 | 4.151350000000  |
| C | -8.675414000000  | 0.054856000000  | 5.500060000000  |
| C | 8.629081000000   | 9.633842000000  | -0.328524000000 |
| N | 7.262470000000   | 10.961549000000 | 1.205438000000  |
| N | 11.920921000000  | -8.708370000000 | -2.153953000000 |
| C | 12.859407000000  | -6.987800000000 | -0.947171000000 |
| C | 11.570006000000  | -5.605156000000 | 0.462280000000  |
| C | -10.066432000000 | 1.640151000000  | -1.502986000000 |
| C | -11.268119000000 | 2.986761000000  | 0.042812000000  |
| N | -10.252970000000 | 4.664319000000  | 1.233920000000  |
| C | 2.359051000000   | 0.067622000000  | 5.373444000000  |
| C | 3.557416000000   | 2.068114000000  | 6.045147000000  |
| C | -6.489968000000  | -0.775276000000 | -7.782465000000 |
| C | -7.434965000000  | -0.372111000000 | -5.610851000000 |
| O | -9.792533000000  | 0.835179000000  | 5.051123000000  |
| O | 9.814171000000   | 10.409313000000 | -0.003808000000 |
| N | 13.987877000000  | -7.426276000000 | -1.528962000000 |
| C | 12.783716000000  | -5.935921000000 | -0.043224000000 |
| C | -11.242283000000 | 1.952567000000  | -0.888284000000 |
| N | -12.366721000000 | 3.409291000000  | 0.702478000000  |
| H | 1.445023000000   | -0.410233000000 | 5.088521000000  |
| C | 3.524637000000   | -0.682951000000 | 5.451322000000  |
| H | 3.586758000000   | 3.125651000000  | 6.211785000000  |
| C | 4.712150000000   | 1.272516000000  | 6.262708000000  |
| C | -7.661203000000  | -1.411058000000 | -8.195984000000 |
| H | -5.660406000000  | -0.690493000000 | -8.459016000000 |
| C | -8.569644000000  | -1.115115000000 | -5.974343000000 |
| H | -7.374424000000  | 0.067898000000  | -4.637668000000 |
| C | -10.473927000000 | 0.234276000000  | 3.953626000000  |
| C | 11.081802000000  | 9.810285000000  | -0.310148000000 |

|   |                  |                 |                  |
|---|------------------|-----------------|------------------|
| C | 14.048443000000  | -5.162672000000 | 0.377135000000   |
| C | -12.509406000000 | 1.173361000000  | -1.266377000000  |
| C | 3.493855000000   | -2.158829000000 | 5.009185000000   |
| C | 4.705475000000   | -0.093793000000 | 5.908653000000   |
| C | 5.976718000000   | 1.897581000000  | 6.891047000000   |
| C | -7.816643000000  | -1.890837000000 | -9.649572000000  |
| C | -8.687461000000  | -1.623939000000 | -7.273365000000  |
| C | -9.669069000000  | -1.392214000000 | -4.933898000000  |
| C | -9.945015000000  | 0.230525000000  | 2.651969000000   |
| C | -11.708810000000 | -0.357818000000 | 4.212277000000   |
| C | 11.966065000000  | 10.814152000000 | -0.443143000000  |
| C | 11.524906000000  | 8.909640000000  | 0.614428000000   |
| C | 15.109174000000  | -5.015993000000 | -0.525101000000  |
| C | 14.140573000000  | -4.608313000000 | 1.663083000000   |
| C | -12.582955000000 | 0.613736000000  | -2.556553000000  |
| C | -13.528630000000 | 1.015621000000  | -0.386805000000  |
| H | 2.503184000000   | -2.546452000000 | 5.130830000000   |
| H | 4.175486000000   | -2.727425000000 | 5.603568000000   |
| H | 3.778293000000   | -2.223637000000 | 3.977679000000   |
| O | 5.889160000000   | -0.896944000000 | 6.008594000000   |
| H | 5.915254000000   | 1.834505000000  | 7.962581000000   |
| H | 6.843942000000   | 1.367992000000  | 6.557040000000   |
| H | 6.044903000000   | 2.921622000000  | 6.599567000000   |
| H | -6.860578000000  | -2.154459000000 | -10.045410000000 |
| H | -8.465035000000  | -2.738454000000 | -9.677449000000  |
| H | -8.239485000000  | -1.099353000000 | -10.239400000000 |
| O | -9.851092000000  | -2.350278000000 | -7.670748000000  |
| H | -10.618662000000 | -1.440316000000 | -5.423577000000  |
| H | -9.469171000000  | -2.322311000000 | -4.446206000000  |
| H | -9.684212000000  | -0.604458000000 | -4.207802000000  |
| H | -8.994478000000  | 0.685192000000  | 2.453144000000   |
| C | -10.671707000000 | -0.379170000000 | 1.611298000000   |
| H | -12.101115000000 | -0.347689000000 | 5.207928000000   |
| C | -12.431641000000 | -0.954735000000 | 3.182545000000   |
| C | 13.317498000000  | 10.507992000000 | -0.644027000000  |
| H | 11.644476000000  | 11.824894000000 | -0.402527000000  |
| C | 12.858290000000  | 8.458369000000  | 0.405965000000   |
| H | 10.933901000000  | 8.552252000000  | 1.438477000000   |
| H | 15.054117000000  | -5.465393000000 | -1.494453000000  |
| C | 16.233919000000  | -4.262848000000 | -0.167167000000  |
| H | 13.320797000000  | -4.691140000000 | 2.344691000000   |
| C | 15.319097000000  | -3.962795000000 | 2.060096000000   |
| C | -13.756195000000 | -0.020793000000 | -2.971697000000  |
| H | -11.756512000000 | 0.700308000000  | -3.232958000000  |
| C | -14.664636000000 | 0.274371000000  | -0.751075000000  |
| H | -13.471898000000 | 1.456500000000  | 0.585682000000   |

|   |                  |                 |                 |
|---|------------------|-----------------|-----------------|
| C | 6.572103000000   | -0.905345000000 | 4.741410000000  |
| C | -9.570599000000  | -3.746455000000 | -7.529426000000 |
| C | -11.918835000000 | -0.973921000000 | 1.881721000000  |
| H | -10.275655000000 | -0.393485000000 | 0.619066000000  |
| H | -13.381079000000 | -1.398892000000 | 3.388069000000  |
| H | 13.986595000000  | 11.233495000000 | -1.052234000000 |
| C | 13.743125000000  | 9.272122000000  | -0.289491000000 |
| H | 13.184217000000  | 7.515629000000  | 0.781172000000  |
| C | 17.334204000000  | -3.984670000000 | -1.208802000000 |
| C | 16.349394000000  | -3.757494000000 | 1.135888000000  |
| C | 15.488733000000  | -3.478705000000 | 3.513216000000  |
| C | -13.907836000000 | -0.504052000000 | -4.424672000000 |
| C | -14.780688000000 | -0.238654000000 | -2.048344000000 |
| C | -15.760724000000 | -0.005602000000 | 0.291824000000  |
| H | 5.909127000000   | -1.262755000000 | 3.978802000000  |
| H | 7.425798000000   | -1.548423000000 | 4.799264000000  |
| H | 6.888678000000   | 0.087472000000  | 4.499922000000  |
| H | -8.752354000000  | -4.007310000000 | -8.166316000000 |
| H | -10.432338000000 | -4.318689000000 | -7.805737000000 |
| H | -9.315647000000  | -3.956303000000 | -6.513612000000 |
| O | -12.688660000000 | -1.610108000000 | 0.851714000000  |
| O | 15.077974000000  | 8.864201000000  | -0.593077000000 |
| H | 17.351791000000  | -4.770277000000 | -1.935927000000 |
| H | 18.284130000000  | -3.929543000000 | -0.721778000000 |
| H | 17.126682000000  | -3.053688000000 | -1.695568000000 |
| O | 17.510196000000  | -3.023269000000 | 1.527913000000  |
| H | 15.915598000000  | -4.263996000000 | 4.106393000000  |
| H | 16.136643000000  | -2.629476000000 | 3.529028000000  |
| H | 14.535269000000  | -3.210429000000 | 3.915400000000  |
| H | -12.951281000000 | -0.765853000000 | -4.819815000000 |
| H | -14.555750000000 | -1.350808000000 | -4.453277000000 |
| H | -14.330662000000 | 0.288032000000  | -5.015861000000 |
| O | -15.944515000000 | -0.961773000000 | -2.446911000000 |
| H | -16.711472000000 | -0.053072000000 | -0.196814000000 |
| H | -15.559982000000 | -0.934243000000 | 0.778820000000  |
| H | -15.775906000000 | 0.783531000000  | 1.017302000000  |
| C | -11.862092000000 | -2.028555000000 | -0.237829000000 |
| C | 15.726181000000  | 9.771257000000  | -1.510363000000 |
| C | 17.235223000000  | -1.627399000000 | 1.381749000000  |
| C | -15.661332000000 | -2.358717000000 | -2.304261000000 |
| H | -12.452401000000 | -2.587226000000 | -0.936226000000 |
| H | -11.067786000000 | -2.643743000000 | 0.128628000000  |
| H | -11.453941000000 | -1.167936000000 | -0.723715000000 |
| H | 16.727251000000  | 9.431018000000  | -1.699303000000 |
| H | 15.186371000000  | 9.811880000000  | -2.428744000000 |
| H | 15.765807000000  | 10.750495000000 | -1.074124000000 |

|   |                  |                 |                 |
|---|------------------|-----------------|-----------------|
| H | 16.979920000000  | -1.418891000000 | 0.364882000000  |
| H | 18.098660000000  | -1.057679000000 | 1.655755000000  |
| H | 16.417198000000  | -1.360772000000 | 2.017476000000  |
| H | -14.842871000000 | -2.619313000000 | -2.940988000000 |
| H | -16.522799000000 | -2.930942000000 | -2.580421000000 |
| H | -15.406109000000 | -2.568409000000 | -1.288366000000 |
| S | 13.604913000000  | -8.870905000000 | -2.344043000000 |
| S | -8.511231000000  | -3.636026000000 | 4.051618000000  |
| S | -1.777376000000  | -0.122324000000 | 7.126412000000  |
| S | -5.845027000000  | 3.453747000000  | -3.718302000000 |
| S | 5.583225000000   | 11.137068000000 | 1.469234000000  |
| S | -11.934610000000 | 4.845580000000  | 1.511585000000  |
| C | 0.542013000000   | 0.266500000000  | -0.977754000000 |
| C | -1.908939000000  | -1.185576000000 | -0.930107000000 |
| C | 9.813819000000   | 8.152447000000  | -2.116928000000 |
| C | 7.507158000000   | 6.770960000000  | -2.541851000000 |
| C | -7.720877000000  | 1.827720000000  | -2.055158000000 |
| C | -10.032912000000 | 0.486276000000  | -2.510252000000 |
| C | -1.619500000000  | 0.472797000000  | -7.306053000000 |
| C | -3.917786000000  | -0.909954000000 | -7.731597000000 |
| C | 3.726878000000   | -4.000223000000 | -0.749422000000 |
| C | 1.424781000000   | -5.377996000000 | -1.175831000000 |
| C | 11.465753000000  | -4.438827000000 | 1.460633000000  |
| C | 9.041770000000   | -5.840749000000 | 0.604423000000  |
| C | -5.592020000000  | 0.625839000000  | 7.860588000000  |
| C | -8.227954000000  | 1.945524000000  | 7.091696000000  |
| C | 2.017092000000   | 4.252448000000  | 4.363227000000  |
| C | -0.694335000000  | 5.323270000000  | 3.979110000000  |
| O | 10.928586000000  | 8.783304000000  | -1.979681000000 |
| O | 9.711428000000   | 7.144297000000  | -2.935320000000 |
| O | 8.612569000000   | 6.402756000000  | -3.185893000000 |
| O | 6.424581000000   | 6.143953000000  | -2.763584000000 |
| O | 0.483764000000   | 0.267171000000  | 0.360133000000  |
| O | 0.659561000000   | 1.280255000000  | -1.613182000000 |
| O | -2.633825000000  | -2.265786000000 | -0.570622000000 |
| O | -2.079258000000  | -0.097864000000 | -0.424704000000 |
| O | -6.566619000000  | 2.366611000000  | -1.874961000000 |
| O | -7.830041000000  | 0.848672000000  | -2.914673000000 |
| O | -8.931652000000  | 0.122366000000  | -3.170344000000 |
| O | -11.141667000000 | -0.165310000000 | -2.729043000000 |
| O | -0.504424000000  | 1.103722000000  | -7.172474000000 |
| O | -1.718711000000  | -0.535097000000 | -8.128648000000 |
| O | -2.814456000000  | -1.280299000000 | -8.374262000000 |
| O | -5.032275000000  | -1.560795000000 | -7.960195000000 |
| O | 4.844213000000   | -3.370249000000 | -0.611680000000 |
| O | 3.627503000000   | -5.007811000000 | -1.573759000000 |

|   |                 |                 |                 |
|---|-----------------|-----------------|-----------------|
| O | 2.529572000000  | -5.750476000000 | -1.819973000000 |
| O | 0.311682000000  | -6.030554000000 | -1.403354000000 |
| O | 12.542397000000 | -3.796907000000 | 1.820368000000  |
| O | 10.305679000000 | -4.091935000000 | 1.939266000000  |
| O | 3.381026000000  | 3.938372000000  | 4.618998000000  |
| O | 1.741858000000  | 5.282911000000  | 3.693681000000  |
| O | 8.990523000000  | -4.822837000000 | 1.417883000000  |
| O | 7.950459000000  | -6.453700000000 | 0.247223000000  |
| O | -4.474834000000 | 0.000946000000  | 8.487811000000  |
| O | -5.815055000000 | 1.845337000000  | 8.083783000000  |
| O | -7.605597000000 | 2.382325000000  | 8.306326000000  |
| O | -9.121559000000 | 2.645215000000  | 6.546736000000  |
| H | 8.818882000000  | 5.507810000000  | -2.913034000000 |
| H | 10.992690000000 | 9.271644000000  | -1.193246000000 |
| H | 0.416694000000  | 1.206008000000  | 0.619944000000  |
| H | -3.311080000000 | -1.940153000000 | 0.052352000000  |
| H | -6.460319000000 | 2.938755000000  | -1.147353000000 |
| H | -8.730610000000 | -0.773679000000 | -2.897719000000 |
| H | -2.609758000000 | -2.174334000000 | -8.099736000000 |
| H | -0.427506000000 | 1.585953000000  | -6.381084000000 |
| H | 2.732579000000  | -6.644158000000 | -1.544808000000 |
| H | 4.897804000000  | -2.879324000000 | 0.175651000000  |
| H | -4.300832000000 | 0.463681000000  | 9.316975000000  |
| H | -7.692790000000 | 3.331315000000  | 8.394532000000  |
| H | 12.481760000000 | -3.059261000000 | 2.432379000000  |
| H | 8.147005000000  | -4.513640000000 | 1.753852000000  |
| O | -1.954802000000 | 5.776134000000  | 3.482864000000  |
| O | 0.323910000000  | 6.064663000000  | 3.910021000000  |
| H | 3.886654000000  | 4.759593000000  | 4.607641000000  |
| H | -1.985440000000 | 6.733280000000  | 3.498088000000  |

Excited State:

HB:

|   |                 |                 |                 |
|---|-----------------|-----------------|-----------------|
| S | -0.173834000000 | 0.681432000000  | -3.538547000000 |
| S | 0.523975000000  | -0.755819000000 | 3.416198000000  |
| O | 3.349549000000  | -0.978476000000 | -1.538830000000 |
| O | -3.113030000000 | 0.875770000000  | 1.686473000000  |
| O | 2.254792000000  | 7.135761000000  | 0.977641000000  |
| O | -2.350477000000 | -7.120877000000 | -0.962679000000 |
| N | -1.132991000000 | -0.229198000000 | -2.489461000000 |
| N | 1.419356000000  | 0.149649000000  | 2.428917000000  |
| O | -2.220035000000 | 5.191632000000  | -1.030029000000 |
| O | 2.124353000000  | -5.176746000000 | 1.044990000000  |
| N | 1.345989000000  | 0.215762000000  | -2.977598000000 |
| N | -0.961122000000 | -0.314492000000 | 2.967137000000  |
| C | -0.279585000000 | -0.895378000000 | -1.703551000000 |



|   |                 |                 |                 |
|---|-----------------|-----------------|-----------------|
| C | 0.564074000000  | 0.868586000000  | 1.673554000000  |
| C | 1.093308000000  | -0.635861000000 | -1.975274000000 |
| C | -0.806376000000 | 0.583516000000  | 1.983148000000  |
| C | -0.645710000000 | -1.800766000000 | -0.646633000000 |
| C | 0.908568000000  | 1.811316000000  | 0.656467000000  |
| C | 0.403945000000  | -2.344013000000 | 0.146321000000  |
| C | -0.153958000000 | 2.353733000000  | -0.022566000000 |
| H | 0.164730000000  | -3.005603000000 | 0.968153000000  |
| H | 0.030918000000  | 2.950245000000  | -0.711680000000 |
| C | 2.093835000000  | -1.274309000000 | -1.192246000000 |
| C | -1.862216000000 | 1.216790000000  | 1.263673000000  |
| C | 1.731515000000  | -2.106939000000 | -0.113170000000 |
| C | -1.520278000000 | 2.065647000000  | 0.255269000000  |
| H | 2.484508000000  | -2.559058000000 | 0.514622000000  |
| H | -2.187150000000 | 2.460795000000  | -0.257861000000 |
| C | -2.014244000000 | -2.198230000000 | -0.396771000000 |
| C | 2.309326000000  | 2.207243000000  | 0.380778000000  |
| C | -2.971637000000 | -2.227988000000 | -1.433989000000 |
| C | 3.222454000000  | 2.405406000000  | 1.414732000000  |
| H | -2.689710000000 | -1.893400000000 | -2.421922000000 |
| H | 2.962792000000  | 2.228969000000  | 2.289891000000  |
| C | 4.477223000000  | -1.577385000000 | -1.012639000000 |
| C | -4.231994000000 | 1.456059000000  | 1.078383000000  |
| C | -2.421457000000 | -2.610328000000 | 0.889513000000  |
| C | 2.734501000000  | 2.431687000000  | -0.923281000000 |
| H | -1.726832000000 | -2.543126000000 | 1.718265000000  |
| H | 2.137693000000  | 2.287224000000  | -1.621748000000 |
| C | 5.525531000000  | -0.718604000000 | -0.725842000000 |
| C | -5.124521000000 | 0.611445000000  | 0.475157000000  |
| H | 5.390669000000  | 0.346407000000  | -0.865244000000 |
| H | -4.938349000000 | -0.297678000000 | 0.418224000000  |
| C | 1.514699000000  | 4.158635000000  | 4.804883000000  |
| C | -1.610270000000 | -4.143747000000 | -4.790008000000 |
| C | 6.733399000000  | -1.222534000000 | -0.265304000000 |
| C | -6.308985000000 | 1.113222000000  | -0.051726000000 |
| H | 7.534699000000  | -0.530780000000 | -0.040980000000 |
| H | -6.922379000000 | 0.540895000000  | -0.453892000000 |
| C | -3.716616000000 | -3.021268000000 | 1.152799000000  |
| C | 4.021860000000  | 2.863762000000  | -1.217850000000 |
| C | -4.620693000000 | -3.082000000000 | 0.079520000000  |
| C | 4.889107000000  | 3.106597000000  | -0.153399000000 |
| C | -4.256125000000 | -2.694238000000 | -1.219019000000 |
| C | 4.516846000000  | 2.862465000000  | 1.167864000000  |
| C | 0.603584000000  | 3.317860000000  | 4.193240000000  |
| C | -0.699203000000 | -3.302905000000 | -4.178309000000 |
| H | 0.776848000000  | 2.404658000000  | 4.143994000000  |

|   |                 |                 |                 |
|---|-----------------|-----------------|-----------------|
| H | -0.872484000000 | -2.389840000000 | -4.129088000000 |
| C | -0.561036000000 | 3.826213000000  | 3.656054000000  |
| C | 0.465355000000  | -3.811327000000 | -3.641094000000 |
| H | -1.165421000000 | 3.261891000000  | 3.231162000000  |
| H | 1.069786000000  | -3.247071000000 | -3.216255000000 |
| C | 2.156679000000  | 5.727727000000  | 1.150039000000  |
| C | -2.252363000000 | -5.712840000000 | -1.135079000000 |
| H | 1.243596000000  | 5.489669000000  | 1.328672000000  |
| H | -1.339278000000 | -5.474782000000 | -1.313712000000 |
| H | 2.708682000000  | 5.456530000000  | 1.887744000000  |
| H | -2.804316000000 | -5.441711000000 | -1.872838000000 |
| H | 2.452434000000  | 5.285794000000  | 0.349998000000  |
| H | -2.548003000000 | -5.270905000000 | -0.335122000000 |
| C | -4.148452000000 | -3.352027000000 | 2.555707000000  |
| C | 4.475944000000  | 3.003188000000  | -2.649383000000 |
| H | 3.052265000000  | 7.356400000000  | 3.227023000000  |
| H | -3.147898000000 | -7.341583000000 | -3.212116000000 |
| H | -3.547123000000 | -2.795321000000 | 3.277972000000  |
| H | 4.417020000000  | 2.152316000000  | -3.088578000000 |
| H | -4.030965000000 | -4.418599000000 | 2.780175000000  |
| H | 3.914253000000  | 3.637015000000  | -3.102615000000 |
| C | -5.251112000000 | -2.777429000000 | -2.344769000000 |
| C | 5.473865000000  | 3.087230000000  | 2.312269000000  |
| H | -4.777479000000 | -2.513064000000 | -3.292510000000 |
| H | 5.040635000000  | 2.863552000000  | 3.139610000000  |
| H | -6.100893000000 | -2.108509000000 | -2.174500000000 |
| H | 6.248485000000  | 2.532155000000  | 2.195956000000  |
| H | -5.661043000000 | -3.787931000000 | -2.441263000000 |
| H | 5.740426000000  | 4.010142000000  | 2.329952000000  |
| C | -1.316871000000 | 5.986131000000  | -0.287749000000 |
| C | 1.221238000000  | -5.971313000000 | 0.302655000000  |
| H | -0.576997000000 | 5.445533000000  | -0.000581000000 |
| H | 0.481380000000  | -5.430578000000 | 0.015512000000  |
| H | -1.765677000000 | 6.348628000000  | 0.478966000000  |
| H | 1.670058000000  | -6.333672000000 | -0.464036000000 |
| H | -0.994404000000 | 6.702850000000  | -0.838933000000 |
| H | 0.898720000000  | -6.687964000000 | 0.853894000000  |
| C | 3.547748000000  | 7.561745000000  | 0.711945000000  |
| C | -3.643382000000 | -7.546927000000 | -0.697038000000 |
| C | -3.341909000000 | 5.805223000000  | -1.521922000000 |
| C | 3.246338000000  | -5.790336000000 | 1.536798000000  |
| C | 4.629284000000  | -2.956505000000 | -0.877001000000 |
| C | -4.492385000000 | 2.801534000000  | 1.175326000000  |
| C | 1.255504000000  | 5.514545000000  | 4.883028000000  |
| O | 2.636573000000  | 3.545042000000  | 5.296777000000  |
| O | -2.732256000000 | -3.530157000000 | -5.281816000000 |

|   |                 |                 |                 |
|---|-----------------|-----------------|-----------------|
| C | -1.351188000000 | -5.499657000000 | -4.868066000000 |
| C | 6.890310000000  | -2.597596000000 | -0.103583000000 |
| C | -6.568057000000 | 2.469182000000  | 0.026466000000  |
| O | -5.923813000000 | -3.449099000000 | 0.294630000000  |
| O | 6.182122000000  | 3.532560000000  | -0.419017000000 |
| C | -0.821412000000 | 5.171826000000  | 3.753021000000  |
| C | 0.725792000000  | -5.156870000000 | -3.738090000000 |
| H | -5.199779000000 | -3.097251000000 | 2.707903000000  |
| H | 5.384650000000  | 3.311921000000  | -2.668399000000 |
| C | 3.920117000000  | 7.805789000000  | -0.609295000000 |
| C | 4.414995000000  | 7.804580000000  | 1.776396000000  |
| C | -4.510678000000 | -7.789695000000 | -1.761436000000 |
| C | -4.015689000000 | -7.790901000000 | 0.624171000000  |
| C | -4.253024000000 | 4.964449000000  | -2.133565000000 |
| C | -3.601105000000 | 7.161133000000  | -1.443777000000 |
| C | 3.505420000000  | -7.146248000000 | 1.458738000000  |
| C | 4.157406000000  | -4.949492000000 | 2.148496000000  |
| H | 3.815592000000  | -3.632078000000 | -1.115348000000 |
| C | 5.837680000000  | -3.459300000000 | -0.420373000000 |
| C | -5.656942000000 | 3.309957000000  | 0.638109000000  |
| H | -3.888001000000 | 3.365857000000  | 1.600218000000  |
| C | 0.071040000000  | 6.016321000000  | 4.356145000000  |
| H | 1.868962000000  | 6.086941000000  | 5.285164000000  |
| C | 3.539736000000  | 4.339541000000  | 6.039056000000  |
| C | -3.635371000000 | -4.324724000000 | -6.024150000000 |
| H | -1.964581000000 | -6.071984000000 | -5.270234000000 |
| C | -0.166674000000 | -6.001504000000 | -4.341239000000 |
| O | 8.037407000000  | -3.180061000000 | 0.352345000000  |
| O | -7.689994000000 | 3.082704000000  | -0.465396000000 |
| C | -6.150491000000 | -4.848425000000 | 0.408305000000  |
| C | 6.280235000000  | 4.940594000000  | -0.591415000000 |
| O | -1.940392000000 | 5.751977000000  | 3.144907000000  |
| O | 1.844757000000  | -5.737159000000 | -3.130000000000 |
| C | 2.963048000000  | 7.581092000000  | -1.753645000000 |
| C | 5.214460000000  | 8.262916000000  | -0.856109000000 |
| C | 5.702415000000  | 8.236633000000  | 1.481904000000  |
| C | 3.960911000000  | 7.665153000000  | 3.207929000000  |
| C | -4.056545000000 | -7.650336000000 | -3.193023000000 |
| C | -5.798048000000 | -8.221816000000 | -1.466998000000 |
| C | -5.310030000000 | -8.248028000000 | 0.870984000000  |
| C | -3.058620000000 | -7.566204000000 | 1.768521000000  |
| C | -5.417646000000 | 5.472801000000  | -2.670750000000 |
| H | -4.079760000000 | 4.051246000000  | -2.182811000000 |
| C | -4.785569000000 | 7.662911000000  | -1.970660000000 |
| H | -2.987646000000 | 7.733530000000  | -1.041641000000 |
| H | 2.892028000000  | -7.718574000000 | 1.056572000000  |

|   |                 |                 |                 |
|---|-----------------|-----------------|-----------------|
| C | 4.689934000000  | -7.648092000000 | 1.985566000000  |
| H | 3.984125000000  | -4.036428000000 | 2.197717000000  |
| C | 5.321962000000  | -5.457915000000 | 2.685712000000  |
| H | 5.975693000000  | -4.528869000000 | -0.307461000000 |
| H | -5.830330000000 | 4.223110000000  | 0.687308000000  |
| H | -0.115133000000 | 6.925443000000  | 4.413078000000  |
| H | 3.862205000000  | 5.056262000000  | 5.487873000000  |
| H | 4.279610000000  | 3.798945000000  | 6.326225000000  |
| H | 3.090932000000  | 4.702040000000  | 6.805771000000  |
| H | -4.375229000000 | -3.783989000000 | -6.311294000000 |
| H | -3.186550000000 | -4.687083000000 | -6.790841000000 |
| H | -3.957888000000 | -5.041375000000 | -5.472911000000 |
| H | 0.019498000000  | -6.910625000000 | -4.398172000000 |
| C | 9.060153000000  | -2.318530000000 | 0.810677000000  |
| C | -8.593218000000 | 2.288224000000  | -1.207754000000 |
| H | -5.850463000000 | -5.367600000000 | -0.507902000000 |
| H | -7.221852000000 | -4.980254000000 | 0.564210000000  |
| H | -5.607830000000 | -5.276796000000 | 1.256385000000  |
| H | 5.728280000000  | 5.211723000000  | -1.329175000000 |
| H | 7.193318000000  | 5.178652000000  | -0.770048000000 |
| H | 5.984481000000  | 5.382527000000  | 0.208626000000  |
| C | -3.191204000000 | 5.410955000000  | 3.567707000000  |
| C | 3.095522000000  | -5.396070000000 | -3.552745000000 |
| H | 3.396279000000  | 7.804770000000  | -2.580986000000 |
| H | 2.188430000000  | 8.136168000000  | -1.637332000000 |
| H | 2.696489000000  | 6.658179000000  | -1.771328000000 |
| H | 5.474063000000  | 8.439373000000  | -1.731345000000 |
| C | 6.127588000000  | 8.461079000000  | 0.177845000000  |
| H | 6.299222000000  | 8.381097000000  | 2.180372000000  |
| H | 4.019895000000  | 8.516005000000  | 3.647202000000  |
| H | 4.522709000000  | 7.031239000000  | 3.661184000000  |
| H | -4.618280000000 | -7.016351000000 | -3.646308000000 |
| H | -4.115577000000 | -8.501120000000 | -3.632241000000 |
| H | -6.394858000000 | -8.366280000000 | -2.165466000000 |
| C | -6.223208000000 | -8.446122000000 | -0.162915000000 |
| H | -5.569746000000 | -8.424486000000 | 1.746306000000  |
| H | -2.284049000000 | -8.121212000000 | 1.652263000000  |
| H | -2.792107000000 | -6.643224000000 | 1.786258000000  |
| H | -3.491913000000 | -7.789952000000 | 2.595893000000  |
| H | -6.022028000000 | 4.908478000000  | -3.095644000000 |
| C | -5.678020000000 | 6.818415000000  | -2.573784000000 |
| H | -4.971741000000 | 8.572032000000  | -1.913727000000 |
| C | 5.582401000000  | -6.803459000000 | 2.588714000000  |
| H | 4.876107000000  | -8.557215000000 | 1.928633000000  |
| H | 5.926395000000  | -4.893661000000 | 3.110550000000  |
| H | 9.469117000000  | -1.708622000000 | -0.003702000000 |

|   |                  |                  |                 |
|---|------------------|------------------|-----------------|
| H | 9.850620000000   | -2.952621000000  | 1.212148000000  |
| H | 8.698561000000   | -1.657222000000  | 1.605796000000  |
| H | -9.333016000000  | 2.828939000000   | -1.494821000000 |
| H | -8.144338000000  | 1.925844000000   | -1.974367000000 |
| H | -8.915626000000  | 1.571485000000   | -0.656492000000 |
| C | -4.247045000000  | 6.044230000000   | 2.848231000000  |
| C | -3.533081000000  | 4.562171000000   | 4.576080000000  |
| C | 3.437509000000   | -4.547282000000  | -4.561206000000 |
| C | 4.151362000000   | -6.029344000000  | -2.833270000000 |
| C | 7.528395000000   | 8.856937000000   | -0.097898000000 |
| C | -7.623965000000  | -8.842050000000  | 0.112774000000  |
| O | -6.796999000000  | 7.398566000000   | -3.181899000000 |
| O | 6.701365000000   | -7.383748000000  | 3.196805000000  |
| N | -4.092236000000  | 6.942308000000   | 1.864212000000  |
| C | -5.617495000000  | 5.759160000000   | 3.157826000000  |
| H | -2.866269000000  | 4.166950000000   | 5.089240000000  |
| C | -4.899465000000  | 4.274013000000   | 4.853946000000  |
| C | 4.803829000000   | -4.259195000000  | -4.839040000000 |
| H | 2.770588000000   | -4.152065000000  | -5.074279000000 |
| C | 5.521813000000   | -5.744275000000  | -3.142865000000 |
| N | 3.996667000000   | -6.927420000000  | -1.849336000000 |
| C | 7.872889000000   | 9.799667000000   | -1.114985000000 |
| C | 8.590872000000   | 8.314588000000   | 0.581190000000  |
| C | -8.686491000000  | -8.299632000000  | -0.566259000000 |
| C | -7.968524000000  | -9.784850000000  | 1.129891000000  |
| C | -8.047814000000  | 7.057545000000   | -2.759099000000 |
| C | 7.952130000000   | -7.042658000000  | 2.774059000000  |
| N | -6.472774000000  | 6.478187000000   | 2.402355000000  |
| C | -5.961989000000  | 4.816431000000   | 4.174913000000  |
| H | -5.084276000000  | 3.677572000000   | 5.543029000000  |
| H | 4.988705000000   | -3.662684000000  | -5.528154000000 |
| C | 5.866308000000   | -4.801543000000  | -4.159951000000 |
| N | 6.377155000000   | -6.463231000000  | -2.387424000000 |
| N | 7.017548000000   | 10.518624000000  | -1.870426000000 |
| C | 9.243340000000   | 10.084738000000  | -1.424580000000 |
| C | 9.957193000000   | 8.602676000000   | 0.303355000000  |
| H | 8.405997000000   | 7.718077000000   | 1.270304000000  |
| H | -8.501680000000  | -7.703192000000  | -1.255343000000 |
| C | -10.052826000000 | -8.587858000000  | -0.288450000000 |
| C | -9.338975000000  | -10.069919000000 | 1.439486000000  |
| N | -7.113181000000  | -10.503806000000 | 1.885332000000  |
| C | -9.103653000000  | 7.690819000000   | -3.478574000000 |
| C | -8.389689000000  | 6.208760000000   | -1.750724000000 |
| C | 8.294118000000   | -6.193871000000  | 1.765600000000  |
| C | 9.007970000000   | -7.675933000000  | 3.493535000000  |
| C | -7.362748000000  | 4.420504000000   | 4.450601000000  |

|   |                  |                  |                 |
|---|------------------|------------------|-----------------|
| C | 7.267114000000   | -4.405685000000  | -4.435695000000 |
| N | 9.398037000000   | 10.982813000000  | -2.408513000000 |
| C | 10.299180000000  | 9.451463000000   | -0.705104000000 |
| H | 10.624114000000  | 8.207459000000   | 0.816429000000  |
| H | -10.719684000000 | -8.192570000000  | -0.801554000000 |
| C | -10.394751000000 | -9.436575000000  | 0.719980000000  |
| N | -9.493719000000  | -10.967928000000 | 2.423475000000  |
| N | -8.948844000000  | 8.588898000000   | -4.462593000000 |
| C | -10.474105000000 | 7.405750000000   | -3.168978000000 |
| H | -7.722878000000  | 5.813540000000   | -1.237564000000 |
| C | -9.756073000000  | 5.920601000000   | -1.472859000000 |
| C | 9.660439000000   | -5.905783000000  | 1.487765000000  |
| H | 7.627196000000   | -5.798653000000  | 1.252526000000  |
| C | 10.378421000000  | -7.390862000000  | 3.183940000000  |
| N | 8.853274000000   | -8.574009000000  | 4.477468000000  |
| C | -8.275877000000  | 4.222341000000   | 3.416648000000  |
| C | -7.787971000000  | 4.196127000000   | 5.754716000000  |
| C | 7.692289000000   | -4.181241000000  | -5.739754000000 |
| C | 8.180241000000   | -4.207523000000  | -3.401741000000 |
| O | 11.549945000000  | 9.792553000000   | -1.127849000000 |
| O | -11.645564000000 | -9.777596000000  | 1.142780000000  |
| N | -11.329382000000 | 8.124776000000   | -3.924450000000 |
| C | -10.818658000000 | 6.463039000000   | -2.151971000000 |
| H | -9.940883000000  | 5.324161000000   | -0.783775000000 |
| H | 9.845314000000   | -5.309273000000  | 0.798651000000  |
| C | 10.722974000000  | -6.448154000000  | 2.166932000000  |
| N | 11.233763000000  | -8.109819000000  | 3.939381000000  |
| H | -8.016209000000  | 4.398867000000   | 2.541380000000  |
| C | -9.570267000000  | 3.765281000000   | 3.663516000000  |
| H | -7.191050000000  | 4.340592000000   | 6.453097000000  |
| C | -9.075278000000  | 3.764075000000   | 6.049123000000  |
| C | 8.979707000000   | -3.749187000000  | -6.034247000000 |
| H | 7.095479000000   | -4.325704000000  | -6.438222000000 |
| C | 9.474585000000   | -3.750395000000  | -3.648555000000 |
| H | 7.920640000000   | -4.383979000000  | -2.526505000000 |
| C | 12.668908000000  | 9.212263000000   | -0.519760000000 |
| C | -12.764544000000 | -9.197445000000  | 0.534666000000  |
| C | -12.219355000000 | 6.067092000000   | -1.876204000000 |
| C | 12.123722000000  | -6.052275000000  | 1.891110000000  |
| C | -10.527287000000 | 3.540515000000   | 2.519111000000  |
| C | -9.942525000000  | 3.521240000000   | 4.984670000000  |
| C | -9.529424000000  | 3.624578000000   | 7.480685000000  |
| C | 9.433791000000   | -3.609760000000  | -7.465779000000 |
| C | 9.846954000000   | -3.506351000000  | -4.969795000000 |
| C | 10.431654000000  | -3.525698000000  | -2.504205000000 |
| C | 12.929348000000  | 7.866719000000   | -0.616757000000 |

|   |                  |                  |                 |
|---|------------------|------------------|-----------------|
| C | 13.561376000000  | 10.056898000000  | 0.083389000000  |
| C | -13.656994000000 | -10.041941000000 | -0.068459000000 |
| C | -13.024981000000 | -7.851903000000  | 0.631663000000  |
| C | -13.132485000000 | 5.868929000000   | -2.910157000000 |
| C | -12.644580000000 | 5.842715000000   | -0.572090000000 |
| C | 12.548896000000  | -5.827830000000  | 0.587051000000  |
| C | 13.036851000000  | -5.854112000000  | 2.925064000000  |
| H | -10.093994000000 | 3.764265000000   | 1.691739000000  |
| H | -11.301907000000 | 4.095592000000   | 2.635424000000  |
| H | -10.793847000000 | 2.617604000000   | 2.501428000000  |
| O | -11.235480000000 | 3.095257000000   | 5.250366000000  |
| H | -9.470443000000  | 4.475429000000   | 7.919958000000  |
| H | -10.438008000000 | 3.315895000000   | 7.499748000000  |
| H | -8.967675000000  | 2.990732000000   | 7.933995000000  |
| H | 8.871993000000   | -2.975845000000  | -7.919033000000 |
| H | 10.342436000000  | -3.301007000000  | -7.484872000000 |
| H | 9.374807000000   | -4.460611000000  | -7.905052000000 |
| O | 11.139909000000  | -3.080368000000  | -5.235490000000 |
| H | 11.206273000000  | -4.080773000000  | -2.620518000000 |
| H | 10.698214000000  | -2.602786000000  | -2.486522000000 |
| H | 9.998423000000   | -3.749376000000  | -1.676864000000 |
| H | 12.324916000000  | 7.302466000000   | -1.041594000000 |
| C | 14.093905000000  | 7.358298000000   | -0.079541000000 |
| H | 13.375204000000  | 10.966018000000  | 0.140322000000  |
| C | 14.745889000000  | 9.555052000000   | 0.610217000000  |
| C | -14.841524000000 | -9.540234000000  | -0.595310000000 |
| H | -13.470838000000 | -10.951201000000 | -0.125416000000 |
| C | -14.189539000000 | -7.343480000000  | 0.094447000000  |
| H | -12.420551000000 | -7.287648000000  | 1.056501000000  |
| H | -12.872817000000 | 6.045456000000   | -3.785424000000 |
| C | -14.426876000000 | 5.411871000000   | -2.663290000000 |
| H | -12.047657000000 | 5.987181000000   | 0.126293000000  |
| C | -13.931886000000 | 5.410665000000   | -0.277683000000 |
| C | 13.836316000000  | -5.395776000000  | 0.292559000000  |
| H | 11.952087000000  | -5.972292000000  | -0.111417000000 |
| C | 14.331193000000  | -5.396985000000  | 2.678251000000  |
| H | 12.777247000000  | -6.030568000000  | 3.800300000000  |
| C | -11.333657000000 | 1.687151000000   | 5.422796000000  |
| C | 11.238022000000  | -1.672333000000  | -5.407890000000 |
| C | 15.004973000000  | 8.199139000000   | 0.532158000000  |
| H | 14.267186000000  | 6.445233000000   | -0.128762000000 |
| H | 15.359282000000  | 10.127379000000  | 1.012384000000  |
| H | -15.454917000000 | -10.112560000000 | -0.997478000000 |
| C | -15.100654000000 | -8.184254000000  | -0.517197000000 |
| H | -14.362867000000 | -6.430347000000  | 0.143723000000  |
| C | -15.383895000000 | 5.187105000000   | -3.807695000000 |

|   |                  |                 |                 |
|---|------------------|-----------------|-----------------|
| C | -14.799133000000 | 5.167828000000  | -1.342135000000 |
| C | -14.386033000000 | 5.271167000000  | 1.153879000000  |
| C | 14.290399000000  | -5.256349000000 | -1.138974000000 |
| C | 14.703562000000  | -5.152941000000 | 1.357010000000  |
| C | 15.288262000000  | -5.172288000000 | 3.822601000000  |
| H | -11.037904000000 | 1.245219000000  | 4.622754000000  |
| H | -12.246677000000 | 1.449163000000  | 5.601398000000  |
| H | -10.781639000000 | 1.416094000000  | 6.160524000000  |
| H | 10.686020000000  | -1.401137000000 | -6.145594000000 |
| H | 12.151107000000  | -1.434274000000 | -5.586523000000 |
| H | 10.942269000000  | -1.230400000000 | -4.607847000000 |
| O | 16.126958000000  | 7.585550000000  | 1.023966000000  |
| O | -16.222592000000 | -7.570733000000 | -1.009059000000 |
| H | -14.950602000000 | 5.410853000000  | -4.635067000000 |
| H | -16.158515000000 | 5.742181000000  | -3.691381000000 |
| H | -15.650455000000 | 4.264192000000  | -3.825376000000 |
| O | -16.092088000000 | 4.741845000000  | -1.076440000000 |
| H | -14.327051000000 | 6.122018000000  | 1.593153000000  |
| H | -15.294617000000 | 4.962484000000  | 1.172942000000  |
| H | -13.824283000000 | 4.637320000000  | 1.607189000000  |
| H | 13.728600000000  | -4.622434000000 | -1.592228000000 |
| H | 15.199046000000  | -4.947596000000 | -1.158068000000 |
| H | 14.231416000000  | -6.107201000000 | -1.578247000000 |
| O | 15.996518000000  | -4.726958000000 | 1.091315000000  |
| H | 16.062881000000  | -5.727363000000 | 3.706287000000  |
| H | 15.554821000000  | -4.249375000000 | 3.840283000000  |
| H | 14.855032000000  | -5.395966000000 | 4.649942000000  |
| C | 17.030073000000  | 8.380118000000  | 1.766300000000  |
| C | -17.125708000000 | -8.365298000000 | -1.751394000000 |
| C | -16.190266000000 | 3.333740000000  | -0.904009000000 |
| C | 16.094631000000  | -3.318922000000 | 0.918916000000  |
| H | 17.352590000000  | 9.096768000000  | 1.215062000000  |
| H | 17.769931000000  | 7.839382000000  | 2.053444000000  |
| H | 16.581253000000  | 8.742476000000  | 2.532991000000  |
| H | -17.865565000000 | -7.824564000000 | -2.038538000000 |
| H | -16.676887000000 | -8.727658000000 | -2.518084000000 |
| H | -17.448161000000 | -9.081881000000 | -1.200186000000 |
| H | -15.894512000000 | 2.891807000000  | -1.704052000000 |
| H | -17.103285000000 | 3.095752000000  | -0.725407000000 |
| H | -15.638247000000 | 3.062682000000  | -0.166281000000 |
| H | 15.542628000000  | -3.047726000000 | 0.181212000000  |
| H | 17.007715000000  | -3.080864000000 | 0.740283000000  |
| H | 15.798877000000  | -2.876990000000 | 1.718958000000  |
| S | -10.434006000000 | 9.030155000000  | -4.911624000000 |
| S | 7.912939000000   | 11.424142000000 | -2.857574000000 |
| S | -5.577397000000  | 7.383566000000  | 1.415182000000  |



|   |                 |                  |                 |
|---|-----------------|------------------|-----------------|
| S | 5.481763000000  | -7.368749000000  | -1.400275000000 |
| S | -8.008557000000 | -11.409185000000 | 2.872505000000  |
| S | 10.338371000000 | -9.015337000000  | 4.926530000000  |

FB:

|   |                 |                 |                 |
|---|-----------------|-----------------|-----------------|
| S | 0.404046000000  | -0.652098000000 | -3.617412000000 |
| S | -0.547280000000 | 0.715850000000  | 3.453231000000  |
| O | -3.114225000000 | 0.844822000000  | -1.484133000000 |
| O | 3.069690000000  | -0.928712000000 | 1.694031000000  |
| O | -2.372932000000 | -7.110509000000 | 0.877488000000  |
| O | 2.402822000000  | 7.121651000000  | -0.814506000000 |
| N | 1.360824000000  | 0.253180000000  | -2.575519000000 |
| N | -1.453574000000 | -0.161394000000 | 2.450545000000  |
| O | 2.124666000000  | -5.185340000000 | -1.097303000000 |
| O | -2.094776000000 | 5.196483000000  | 1.160285000000  |
| N | -1.101276000000 | -0.225880000000 | -3.014909000000 |
| N | 0.932362000000  | 0.264670000000  | 2.996031000000  |
| C | 0.529031000000  | 0.882064000000  | -1.747549000000 |
| C | -0.607066000000 | -0.877204000000 | 1.682436000000  |
| C | -0.854016000000 | 0.599573000000  | -1.999010000000 |
| C | 0.766742000000  | -0.614054000000 | 1.996525000000  |
| C | 0.925385000000  | 1.772234000000  | -0.686841000000 |
| C | -0.962963000000 | -1.797786000000 | 0.649117000000  |
| C | -0.130003000000 | 2.263157000000  | 0.127757000000  |
| C | 0.092901000000  | -2.340938000000 | -0.039652000000 |
| C | -1.860561000000 | 1.191936000000  | -1.195356000000 |
| C | 1.814825000000  | -1.247254000000 | 1.265734000000  |
| C | -1.457059000000 | 1.976980000000  | -0.090187000000 |
| C | 1.462610000000  | -2.074166000000 | 0.242738000000  |
| C | 2.301273000000  | 2.187701000000  | -0.485750000000 |
| C | -2.368402000000 | -2.171998000000 | 0.366996000000  |
| C | 3.187396000000  | 2.243496000000  | -1.582523000000 |
| C | -3.283722000000 | -2.377264000000 | 1.397620000000  |
| H | 2.843363000000  | 1.912932000000  | -2.551620000000 |
| H | -3.021861000000 | -2.219302000000 | 2.275649000000  |
| C | -4.275640000000 | 1.459907000000  | -1.084834000000 |
| C | 4.181540000000  | -1.511647000000 | 1.075514000000  |
| C | 2.800577000000  | 2.569171000000  | 0.780469000000  |
| C | -2.796389000000 | -2.368465000000 | -0.940653000000 |
| H | 2.164929000000  | 2.498710000000  | 1.651806000000  |
| H | -2.197970000000 | -2.218964000000 | -1.636679000000 |
| C | -5.358672000000 | 0.601403000000  | -0.968393000000 |
| C | 5.084067000000  | -0.667369000000 | 0.486872000000  |
| H | -5.224283000000 | -0.443816000000 | -1.188440000000 |
| H | 4.908809000000  | 0.244778000000  | 0.445921000000  |
| C | -1.596734000000 | -4.209924000000 | 4.756010000000  |

|   |                 |                 |                 |
|---|-----------------|-----------------|-----------------|
| C | 1.626511000000  | 4.221069000000  | -4.693115000000 |
| C | -6.592753000000 | 1.073218000000  | -0.566631000000 |
| C | 6.262364000000  | -1.174015000000 | -0.049098000000 |
| H | -7.411686000000 | 0.374678000000  | -0.459601000000 |
| H | 6.882534000000  | -0.602135000000 | -0.441385000000 |
| C | 4.105630000000  | 2.997433000000  | 0.947173000000  |
| C | -4.088873000000 | -2.779845000000 | -1.242322000000 |
| C | 4.938901000000  | 3.073079000000  | -0.181340000000 |
| C | -4.958849000000 | -3.030858000000 | -0.182001000000 |
| C | 4.488302000000  | 2.699530000000  | -1.453853000000 |
| C | -4.583532000000 | -2.814374000000 | 1.143211000000  |
| C | -0.675668000000 | -3.369560000000 | 4.158880000000  |
| C | 0.705492000000  | 3.380634000000  | -4.095931000000 |
| H | -0.837969000000 | -2.453623000000 | 4.125681000000  |
| H | 0.867810000000  | 2.464836000000  | -4.062754000000 |
| C | 0.482709000000  | -3.882362000000 | 3.612501000000  |
| C | -0.452820000000 | 3.893505000000  | -3.549519000000 |
| H | 1.093770000000  | -3.317978000000 | 3.197353000000  |
| H | -1.063929000000 | 3.329190000000  | -3.134425000000 |
| C | -2.257913000000 | -5.706985000000 | 1.074472000000  |
| C | 2.287803000000  | 5.718128000000  | -1.011491000000 |
| H | -1.342018000000 | -5.483059000000 | 1.256947000000  |
| H | 1.371909000000  | 5.494200000000  | -1.193966000000 |
| H | -2.806537000000 | -5.442143000000 | 1.816989000000  |
| H | 2.836379000000  | 5.453355000000  | -1.754063000000 |
| H | -2.548436000000 | -5.247600000000 | 0.282384000000  |
| H | 2.578213000000  | 5.258744000000  | -0.219488000000 |
| C | 4.644668000000  | 3.358685000000  | 2.304309000000  |
| C | -4.544762000000 | -2.888735000000 | -2.675928000000 |
| H | -3.172734000000 | -7.360910000000 | 3.122923000000  |
| H | 3.202576000000  | 7.372121000000  | -3.059995000000 |
| H | 3.923168000000  | 3.110357000000  | 3.086009000000  |
| H | -4.475684000000 | -2.031073000000 | -3.100183000000 |
| H | 4.865388000000  | 4.429521000000  | 2.379288000000  |
| H | -3.990769000000 | -3.521222000000 | -3.140366000000 |
| C | 5.399702000000  | 2.769852000000  | -2.648972000000 |
| C | -5.543047000000 | -3.047644000000 | 2.283819000000  |
| H | 5.033574000000  | 2.121779000000  | -3.447816000000 |
| H | -5.107070000000 | -2.843695000000 | 3.114806000000  |
| H | 6.417247000000  | 2.472733000000  | -2.383856000000 |
| H | -6.310966000000 | -2.481367000000 | 2.177490000000  |
| H | 5.451993000000  | 3.786814000000  | -3.054850000000 |
| H | -5.820660000000 | -3.967461000000 | 2.285432000000  |
| C | 1.212121000000  | -5.981822000000 | -0.368750000000 |
| C | -1.182279000000 | 5.993034000000  | 0.431676000000  |
| H | 0.478819000000  | -5.437500000000 | -0.071922000000 |

|   |                 |                 |                 |
|---|-----------------|-----------------|-----------------|
| H | -0.448996000000 | 5.448574000000  | 0.134872000000  |
| H | 1.656634000000  | -6.363042000000 | 0.391357000000  |
| H | -1.626808000000 | 6.374116000000  | -0.328409000000 |
| H | 0.881015000000  | -6.684865000000 | -0.932288000000 |
| H | -0.851124000000 | 6.696007000000  | 0.995269000000  |
| C | -3.670936000000 | -7.516237000000 | 0.604797000000  |
| C | 3.700777000000  | 7.527449000000  | -0.541869000000 |
| C | 3.239041000000  | -5.803638000000 | -1.600224000000 |
| C | -3.209263000000 | 5.814782000000  | 1.663121000000  |
| C | -4.439765000000 | 2.832990000000  | -0.891267000000 |
| C | 4.425781000000  | -2.861639000000 | 1.148808000000  |
| C | -1.353815000000 | -5.570006000000 | 4.810327000000  |
| O | -2.711108000000 | -3.591626000000 | 5.258932000000  |
| O | 2.740996000000  | 3.602769000000  | -5.195952000000 |
| C | 1.383705000000  | 5.581148000000  | -4.747345000000 |
| C | -6.755410000000 | 2.433942000000  | -0.307883000000 |
| C | 6.505158000000  | -2.534146000000 | 0.005265000000  |
| O | 6.246875000000  | 3.439159000000  | -0.006096000000 |
| O | -6.256910000000 | -3.436567000000 | -0.454613000000 |
| C | 0.726932000000  | -5.232494000000 | 3.685816000000  |
| C | -0.697107000000 | 5.243567000000  | -3.622866000000 |
| H | 5.578533000000  | 2.828673000000  | 2.509571000000  |
| H | -5.457110000000 | -3.186167000000 | -2.700048000000 |
| C | -4.046359000000 | -7.732632000000 | -0.720391000000 |
| C | -4.540912000000 | -7.767250000000 | 1.665117000000  |
| C | 4.570801000000  | 7.778393000000  | -1.602136000000 |
| C | 4.076136000000  | 7.743776000000  | 0.783287000000  |
| C | 4.160107000000  | -4.963274000000 | -2.197356000000 |
| C | 3.481958000000  | -7.163721000000 | -1.545909000000 |
| C | -3.452069000000 | 7.174862000000  | 1.608890000000  |
| C | -4.130282000000 | 4.974347000000  | 2.260305000000  |
| H | -3.612592000000 | 3.518721000000  | -1.032314000000 |
| C | -5.678345000000 | 3.311423000000  | -0.506207000000 |
| C | 5.584092000000  | -3.374510000000 | 0.602395000000  |
| H | 3.814720000000  | -3.426024000000 | 1.563954000000  |
| C | -0.175516000000 | -6.076653000000 | 4.274357000000  |
| H | -1.974049000000 | -6.141956000000 | 5.202582000000  |
| C | -3.623654000000 | -4.388109000000 | 5.987487000000  |
| C | 3.653494000000  | 4.399321000000  | -5.924558000000 |
| H | 2.003875000000  | 6.153030000000  | -5.139633000000 |
| C | 0.205359000000  | 6.087865000000  | -4.211429000000 |
| O | -7.912870000000 | 2.974465000000  | 0.123073000000  |
| O | 7.619598000000  | -3.152376000000 | -0.497625000000 |
| C | 6.534730000000  | 4.811505000000  | -0.244560000000 |
| C | -6.371929000000 | -4.840090000000 | -0.651598000000 |
| O | 1.838801000000  | -5.815289000000 | 3.067276000000  |

|   |                 |                 |                 |
|---|-----------------|-----------------|-----------------|
| O | -1.808960000000 | 5.826500000000  | -3.004349000000 |
| C | -3.086796000000 | -7.499432000000 | -1.860945000000 |
| C | -5.346121000000 | -8.169812000000 | -0.974747000000 |
| C | -5.833455000000 | -8.178611000000 | 1.363527000000  |
| C | -4.085023000000 | -7.658361000000 | 3.098723000000  |
| C | 4.114864000000  | 7.669572000000  | -3.035796000000 |
| C | 5.863297000000  | 8.189823000000  | -1.300600000000 |
| C | 5.375897000000  | 8.180956000000  | 1.037641000000  |
| C | 3.116573000000  | 7.510575000000  | 1.923840000000  |
| C | 5.318484000000  | -5.476076000000 | -2.743735000000 |
| H | 3.997805000000  | -4.047337000000 | -2.230553000000 |
| C | 4.660258000000  | -7.670367000000 | -2.081878000000 |
| H | 2.861725000000  | -7.735670000000 | -1.153653000000 |
| H | -2.831900000000 | 7.746743000000  | 1.216602000000  |
| C | -4.630416000000 | 7.681578000000  | 2.144806000000  |
| H | -3.967964000000 | 4.058548000000  | 2.293482000000  |
| C | -5.288595000000 | 5.487218000000  | 2.806716000000  |
| H | -5.835422000000 | 4.369815000000  | -0.339744000000 |
| H | 5.746519000000  | -4.290398000000 | 0.635548000000  |
| H | -0.000258000000 | -6.988799000000 | 4.315308000000  |
| H | -3.954761000000 | -5.091152000000 | 5.423947000000  |
| H | -4.356955000000 | -3.843786000000 | 6.284313000000  |
| H | -3.179141000000 | -4.769328000000 | 6.747593000000  |
| H | 4.386779000000  | 3.854861000000  | -6.221364000000 |
| H | 3.208966000000  | 4.780402000000  | -6.684644000000 |
| H | 3.984650000000  | 5.102292000000  | -5.360966000000 |
| H | 0.030100000000  | 7.000012000000  | -4.252382000000 |
| C | -8.950219000000 | 2.088995000000  | 0.495736000000  |
| C | 8.532203000000  | -2.355914000000 | -1.226257000000 |
| H | 6.251938000000  | 5.112901000000  | -1.257997000000 |
| H | 7.610872000000  | 4.935785000000  | -0.126683000000 |
| H | 6.012953000000  | 5.446299000000  | 0.479047000000  |
| H | -5.823353000000 | -5.104863000000 | -1.394169000000 |
| H | -7.287824000000 | -5.064017000000 | -0.834073000000 |
| H | -6.081407000000 | -5.299476000000 | 0.140490000000  |
| C | 3.093665000000  | -5.496747000000 | 3.495573000000  |
| C | -3.063775000000 | 5.507890000000  | -3.432592000000 |
| H | -3.522772000000 | -7.703381000000 | -2.691932000000 |
| H | -2.318878000000 | -8.065710000000 | -1.754616000000 |
| H | -2.809184000000 | -6.579615000000 | -1.862558000000 |
| H | -5.607924000000 | -8.327794000000 | -1.852853000000 |
| C | -6.261443000000 | -8.375078000000 | 0.055877000000  |
| H | -6.431874000000 | -8.328112000000 | 2.059554000000  |
| H | -4.154157000000 | -8.516002000000 | 3.523057000000  |
| H | -4.639122000000 | -7.025785000000 | 3.563186000000  |
| H | 4.668900000000  | 7.036928000000  | -3.500290000000 |

|   |                  |                  |                 |
|---|------------------|------------------|-----------------|
| H | 4.184048000000   | 8.527145000000   | -3.460074000000 |
| H | 6.461716000000   | 8.339323000000   | -1.996627000000 |
| C | 6.291267000000   | 8.386152000000   | 0.007071000000  |
| H | 5.637813000000   | 8.338937000000   | 1.915833000000  |
| H | 2.348703000000   | 8.076784000000   | 1.817565000000  |
| H | 2.839009000000   | 6.590690000000   | 1.925506000000  |
| H | 3.552615000000   | 7.714593000000   | 2.754861000000  |
| H | 5.929545000000   | -4.911692000000  | -3.158883000000 |
| C | 5.562707000000   | -6.826208000000  | -2.670420000000 |
| H | 4.835516000000   | -8.582513000000  | -2.040927000000 |
| C | -5.532882000000  | 6.837281000000   | 2.733368000000  |
| H | -4.805675000000  | 8.593726000000   | 2.103855000000  |
| H | -5.899703000000  | 4.922903000000   | 3.221809000000  |
| H | -9.336426000000  | 1.534645000000   | -0.368528000000 |
| H | -9.743826000000  | 2.704283000000   | 0.913451000000  |
| H | -8.606247000000  | 1.373247000000   | 1.251362000000  |
| H | 9.265428000000   | -2.900353000000  | -1.522985000000 |
| H | 8.087613000000   | -1.974812000000  | -1.986264000000 |
| H | 8.863251000000   | -1.652851000000  | -0.662640000000 |
| C | 4.141749000000   | -6.129948000000  | 2.764781000000  |
| C | 3.445815000000   | -4.669906000000  | 4.518538000000  |
| C | -3.416038000000  | 4.681048000000   | -4.455642000000 |
| C | -4.111859000000  | 6.141090000000   | -2.701799000000 |
| C | -7.666929000000  | -8.749222000000  | -0.226296000000 |
| C | 7.696706000000   | 8.760363000000   | 0.289193000000  |
| O | 6.674576000000   | -7.409003000000  | -3.288959000000 |
| O | -6.644734000000  | 7.420214000000   | 3.351886000000  |
| N | 3.976063000000   | -7.008741000000  | 1.765244000000  |
| C | 5.515556000000   | -5.866798000000  | 3.078872000000  |
| C | 4.815590000000   | -4.403065000000  | 4.800959000000  |
| C | -4.785748000000  | 4.414276000000   | -4.738031000000 |
| C | -5.485666000000  | 5.877940000000   | -3.015891000000 |
| N | -3.946286000000  | 7.019885000000   | -1.702348000000 |
| C | -8.022826000000  | -9.669804000000  | -1.259616000000 |
| C | -8.722744000000  | -8.206139000000  | 0.462526000000  |
| C | 8.752569000000   | 8.217212000000   | -0.399577000000 |
| C | 8.052668000000   | 9.681015000000   | 1.322542000000  |
| C | 7.929440000000   | -7.090462000000  | -2.860662000000 |
| C | -7.899550000000  | 7.101604000000   | 2.923643000000  |
| N | 6.362060000000   | -6.582696000000  | 2.310653000000  |
| C | 5.871453000000   | -4.946216000000  | 4.112191000000  |
| C | -5.841563000000  | 4.957358000000   | -4.049208000000 |
| N | -6.332235000000  | 6.593770000000   | -2.247704000000 |
| N | -7.176258000000  | -10.385632000000 | -2.027803000000 |
| C | -9.396633000000  | -9.932953000000  | -1.573706000000 |
| C | -10.092454000000 | -8.472911000000  | 0.180136000000  |

|   |                  |                  |                 |
|---|------------------|------------------|-----------------|
| C | 10.122296000000  | 8.484122000000   | -0.117209000000 |
| C | 9.426476000000   | 9.944164000000   | 1.636634000000  |
| N | 7.206100000000   | 10.396844000000  | 2.090729000000  |
| C | 8.977522000000   | -7.723661000000  | -3.591454000000 |
| C | 8.281590000000   | -6.263620000000  | -1.837697000000 |
| C | -8.251812000000  | 6.274762000000   | 1.900593000000  |
| C | -8.947633000000  | 7.734804000000   | 3.654436000000  |
| C | 7.276892000000   | -4.572004000000  | 4.394311000000  |
| C | -7.247051000000  | 4.583216000000   | -4.331384000000 |
| N | -9.562207000000  | -10.811747000000 | -2.573157000000 |
| C | -10.444717000000 | -9.299753000000  | -0.842913000000 |
| C | 10.474494000000  | 9.310896000000   | 0.905809000000  |
| N | 9.592095000000   | 10.822889000000  | 2.636139000000  |
| N | 8.811837000000   | -8.602455000000  | -4.590991000000 |
| C | 10.351331000000  | -7.460512000000  | -3.277363000000 |
| C | 9.651365000000   | -5.996778000000  | -1.555276000000 |
| C | -9.621522000000  | 6.007990000000   | 1.618203000000  |
| C | -10.321441000000 | 7.471654000000   | 3.340344000000  |
| N | -8.782060000000  | 8.613598000000   | 4.653887000000  |
| C | 8.192214000000   | -4.366738000000  | 3.363687000000  |
| C | 7.704927000000   | -4.375608000000  | 5.702015000000  |
| C | -7.675038000000  | 4.386748000000   | -5.639033000000 |
| C | -8.162370000000  | 4.377950000000   | -3.300760000000 |
| O | -11.699534000000 | -9.618363000000  | -1.271157000000 |
| O | 11.729358000000  | 9.629437000000   | 1.334106000000  |
| N | 11.197833000000  | -8.176411000000  | -4.045582000000 |
| C | 10.707287000000  | -6.539949000000  | -2.244123000000 |
| C | -10.677397000000 | 6.551092000000   | 2.307104000000  |
| N | -11.168008000000 | 8.187483000000   | 4.108531000000  |
| H | 7.930346000000   | -4.524789000000  | 2.485548000000  |
| C | 9.492023000000   | -3.929628000000  | 3.618096000000  |
| H | 7.106396000000   | -4.525106000000  | 6.397955000000  |
| C | 8.997358000000   | -3.964245000000  | 6.003520000000  |
| C | -8.967582000000  | 3.975388000000   | -5.940623000000 |
| H | -7.076619000000  | 4.536249000000   | -6.335060000000 |
| C | -9.462134000000  | 3.940769000000   | -3.555115000000 |
| H | -7.900569000000  | 4.535932000000   | -2.422654000000 |
| C | -12.811384000000 | -9.035429000000  | -0.652640000000 |
| C | 12.841226000000  | 9.046642000000   | 0.715567000000  |
| C | 12.112667000000  | -6.165718000000  | -1.961924000000 |
| C | -12.082825000000 | 6.176930000000   | 2.024852000000  |
| C | 10.451539000000  | -3.696357000000  | 2.477489000000  |
| C | 9.867333000000   | -3.713233000000  | 4.943198000000  |
| C | 9.453313000000   | -3.855286000000  | 7.437156000000  |
| C | -9.423470000000  | 3.866498000000   | -7.374229000000 |
| C | -9.837557000000  | 3.724375000000   | -4.880304000000 |

|   |                  |                  |                 |
|---|------------------|------------------|-----------------|
| C | -10.421698000000 | 3.707570000000   | -2.414562000000 |
| C | -13.055673000000 | -7.685368000000  | -0.725986000000 |
| C | -13.713851000000 | -9.879727000000  | -0.064076000000 |
| C | 13.743675000000  | 9.890801000000   | 0.127026000000  |
| C | 13.085515000000  | 7.696579000000   | 0.788914000000  |
| C | 13.027988000000  | -5.960452000000  | -2.992548000000 |
| C | 12.540702000000  | -5.969320000000  | -0.654221000000 |
| C | -12.510812000000 | 5.980463000000   | 0.717202000000  |
| C | -12.998146000000 | 5.971664000000   | 3.055476000000  |
| H | 10.015496000000  | -3.900377000000  | 1.646469000000  |
| H | 11.219457000000  | -4.262637000000  | 2.583818000000  |
| H | 10.729150000000  | -2.776541000000  | 2.475876000000  |
| O | 11.165337000000  | -3.307502000000  | 5.215889000000  |
| H | 9.384176000000   | -4.712928000000  | 7.861490000000  |
| H | 10.365534000000  | -3.557903000000  | 7.461324000000  |
| H | 8.899259000000   | -3.222780000000  | 7.901673000000  |
| H | -8.869370000000  | 3.233923000000   | -7.838691000000 |
| H | -10.335757000000 | 3.569048000000   | -7.398428000000 |
| H | -9.354334000000  | 4.724140000000   | -7.798561000000 |
| O | -11.135559000000 | 3.318647000000   | -5.152992000000 |
| H | -11.189615000000 | 4.273847000000   | -2.520890000000 |
| H | -10.699308000000 | 2.787753000000   | -2.412949000000 |
| H | -9.985719000000  | 3.911519000000   | -1.583573000000 |
| H | -12.444564000000 | -7.121053000000  | -1.141080000000 |
| C | -14.213984000000 | -7.172496000000  | -0.179576000000 |
| H | -13.538594000000 | -10.791874000000 | -0.023125000000 |
| C | -14.892196000000 | -9.373011000000  | 0.471840000000  |
| C | 14.922040000000  | 9.384223000000   | -0.408911000000 |
| H | 13.568435000000  | 10.803086000000  | 0.086052000000  |
| C | 14.243826000000  | 7.183709000000   | 0.242503000000  |
| H | 12.474406000000  | 7.132264000000   | 1.204008000000  |
| H | 12.766121000000  | -6.118503000000  | -3.870686000000 |
| C | 14.327798000000  | -5.523342000000  | -2.738139000000 |
| H | 11.942170000000  | -6.118820000000  | 0.041720000000  |
| C | 13.833133000000  | -5.557960000000  | -0.352716000000 |
| C | -13.803356000000 | 5.569101000000   | 0.415612000000  |
| H | -11.912394000000 | 6.129962000000   | 0.021176000000  |
| C | -14.297908000000 | 5.534483000000   | 2.801121000000  |
| H | -12.736343000000 | 6.129645000000   | 3.933582000000  |
| C | 11.280421000000  | -1.903910000000  | 5.412906000000  |
| C | -11.250578000000 | 1.915123000000   | -5.349978000000 |
| C | -15.135003000000 | -8.012931000000  | 0.417609000000  |
| H | -14.376304000000 | -6.256698000000  | -0.212752000000 |
| H | -15.512366000000 | -9.944893000000  | 0.864127000000  |
| H | 15.542208000000  | 9.956104000000   | -0.801200000000 |
| C | 15.164893000000  | 8.024072000000   | -0.354628000000 |

|   |                  |                 |                 |
|---|------------------|-----------------|-----------------|
| H | 14.406193000000  | 6.267839000000  | 0.275733000000  |
| C | 15.287313000000  | -5.290072000000 | -3.878747000000 |
| C | 14.703108000000  | -5.306946000000 | -1.413037000000 |
| C | 14.289086000000  | -5.449000000000 | 1.080921000000  |
| C | -14.259245000000 | 5.460212000000  | -1.017994000000 |
| C | -14.673330000000 | 5.318089000000  | 1.475932000000  |
| C | -15.257472000000 | 5.301283000000  | 3.941674000000  |
| H | 10.989898000000  | -1.444526000000 | 4.620817000000  |
| H | 12.196251000000  | -1.680053000000 | 5.595348000000  |
| H | 10.731780000000  | -1.639207000000 | 6.155444000000  |
| H | -10.701955000000 | 1.650280000000  | -6.092496000000 |
| H | -12.166473000000 | 1.691196000000  | -5.532453000000 |
| H | -10.960057000000 | 1.455738000000  | -4.557889000000 |
| O | -16.249490000000 | -7.394631000000 | 0.920445000000  |
| O | 16.279331000000  | 7.405843000000  | -0.857517000000 |
| H | 14.851270000000  | -5.494089000000 | -4.709766000000 |
| H | 16.055231000000  | -5.856349000000 | -3.772418000000 |
| H | 15.564925000000  | -4.370255000000 | -3.880359000000 |
| O | 16.001111000000  | -4.901217000000 | -1.140347000000 |
| H | 14.219950000000  | -6.306642000000 | 1.505254000000  |
| H | 15.201310000000  | -5.151617000000 | 1.105088000000  |
| H | 13.735034000000  | -4.816493000000 | 1.545438000000  |
| H | -13.705143000000 | 4.827636000000  | -1.482457000000 |
| H | -15.171532000000 | 5.162761000000  | -1.042193000000 |
| H | -14.190109000000 | 6.317853000000  | -1.442327000000 |
| O | -15.971335000000 | 4.912360000000  | 1.203242000000  |
| H | -16.025389000000 | 5.867561000000  | 3.835345000000  |
| H | -15.535082000000 | 4.381467000000  | 3.943287000000  |
| H | -14.821494000000 | 5.505233000000  | 4.772662000000  |
| C | -17.161988000000 | -8.191183000000 | 1.649053000000  |
| C | 17.191829000000  | 8.202394000000  | -1.586125000000 |
| C | 16.116195000000  | -3.497625000000 | -0.943330000000 |
| C | -16.086354000000 | 3.508836000000  | 1.006257000000  |
| H | -17.493142000000 | -8.894156000000 | 1.085460000000  |
| H | -17.895273000000 | -7.646723000000 | 1.945857000000  |
| H | -16.717458000000 | -8.572265000000 | 2.409138000000  |
| H | 17.925114000000  | 7.657934000000  | -1.882930000000 |
| H | 16.747300000000  | 8.583476000000  | -2.346210000000 |
| H | 17.522920000000  | 8.905298000000  | -1.022565000000 |
| H | 15.825672000000  | -3.038239000000 | -1.735419000000 |
| H | 17.032025000000  | -3.273767000000 | -0.760887000000 |
| H | 15.567554000000  | -3.232921000000 | -0.200790000000 |
| H | -15.537728000000 | 3.243994000000  | 0.263740000000  |
| H | -17.002248000000 | 3.284910000000  | 0.823782000000  |
| H | -15.795831000000 | 3.049451000000  | 1.798346000000  |
| S | 10.291545000000  | -9.053565000000 | -5.048159000000 |



|   |                  |                  |                 |
|---|------------------|------------------|-----------------|
| S | -8.082562000000  | -11.262926000000 | -3.030356000000 |
| S | 5.455771000000   | -7.459851000000  | 1.308077000000  |
| S | -5.425929000000  | 7.471063000000   | -1.245148000000 |
| S | 8.112387000000   | 11.273998000000  | 3.093307000000  |
| S | -10.261704000000 | 9.064778000000   | 5.111086000000  |
| F | 0.133342000000   | 3.058122000000   | 1.174194000000  |
| F | -2.356503000000  | 2.403069000000   | 0.799088000000  |
| F | 11.048625000000  | 7.920300000000   | -0.936476000000 |
| F | 8.499479000000   | 7.295476000000   | -1.367188000000 |
| F | -7.324120000000  | 5.730753000000   | 1.073261000000  |
| F | -9.878832000000  | 5.122902000000   | 0.621760000000  |
| F | -2.489693000000  | 4.125873000000   | -5.279996000000 |
| F | -5.037152000000  | 3.503376000000   | -5.715335000000 |
| F | 2.394886000000   | -2.582072000000  | -0.598810000000 |
| F | -0.165678000000  | -3.239962000000  | -1.024719000000 |
| F | -8.470115000000  | -7.284594000000  | 1.430272000000  |
| F | -11.018826000000 | -7.910078000000  | 1.000149000000  |
| F | 9.908107000000   | -5.113870000000  | -0.555053000000 |
| F | 7.351407000000   | -5.760874000000  | -0.987010000000 |
| F | 5.066601000000   | -3.486792000000  | 5.773477000000  |
| F | 2.519796000000   | -4.107120000000  | 5.338587000000  |

CB:

|   |                 |                 |                 |
|---|-----------------|-----------------|-----------------|
| S | 2.244825000000  | -0.788625000000 | 4.842380000000  |
| S | 0.504977000000  | 3.566062000000  | -0.411598000000 |
| O | -1.518743000000 | -1.348311000000 | 2.855364000000  |
| O | 4.211140000000  | 5.262412000000  | 1.750349000000  |
| O | -2.403436000000 | 9.257487000000  | -0.376831000000 |
| O | -0.435679000000 | -4.502564000000 | -4.232727000000 |
| N | 2.946569000000  | -0.402032000000 | 3.368796000000  |
| N | -0.054315000000 | 3.224797000000  | 1.158878000000  |
| O | 5.464728000000  | 2.749741000000  | 8.322528000000  |
| O | -3.770148000000 | -0.912828000000 | -4.086824000000 |
| N | 0.694080000000  | -1.060716000000 | 4.317564000000  |
| N | 2.045873000000  | 4.061277000000  | 0.115750000000  |
| C | 1.987741000000  | -0.477306000000 | 2.451483000000  |
| C | 0.882912000000  | 3.646829000000  | 2.039497000000  |
| C | 0.716175000000  | -0.836244000000 | 3.012165000000  |
| C | 2.021491000000  | 4.113951000000  | 1.466890000000  |
| C | 2.144510000000  | -0.290308000000 | 1.025878000000  |
| C | 0.749571000000  | 3.596825000000  | 3.446658000000  |
| C | 0.909132000000  | -0.190336000000 | 0.289832000000  |
| C | 1.785093000000  | 4.022857000000  | 4.263587000000  |
| C | -0.448139000000 | -0.906414000000 | 2.206557000000  |
| C | 3.045639000000  | 4.620499000000  | 2.278456000000  |
| C | -0.351420000000 | -0.465508000000 | 0.868211000000  |
| C | 2.933999000000  | 4.535877000000  | 3.689014000000  |

|   |                 |                 |                 |
|---|-----------------|-----------------|-----------------|
| C | 3.438040000000  | -0.383755000000 | 0.374495000000  |
| C | -0.575394000000 | 3.088089000000  | 4.040558000000  |
| C | 4.594981000000  | -0.828212000000 | 1.079026000000  |
| C | -1.738624000000 | 3.560820000000  | 3.531655000000  |
| H | 4.561532000000  | -0.882021000000 | 2.156651000000  |
| H | -1.717652000000 | 4.282631000000  | 2.740656000000  |
| C | -2.827815000000 | -1.358288000000 | 2.392759000000  |
| C | 5.005700000000  | 4.579060000000  | 0.773993000000  |
| C | 3.593341000000  | -0.214004000000 | -1.028817000000 |
| C | -0.583283000000 | 2.160952000000  | 5.082826000000  |
| H | 2.841380000000  | 0.294186000000  | -1.607702000000 |
| H | 0.338448000000  | 1.763463000000  | 5.452244000000  |
| C | -3.729539000000 | -0.650117000000 | 3.163966000000  |
| C | 5.240759000000  | 3.243923000000  | 0.837764000000  |
| H | -3.382075000000 | -0.172884000000 | 4.068353000000  |
| H | 4.768113000000  | 2.653227000000  | 1.594900000000  |
| C | -4.674791000000 | 2.111359000000  | -2.979152000000 |
| C | 4.176789000000  | -5.229264000000 | 0.524662000000  |
| C | -5.054940000000 | -0.560795000000 | 2.771522000000  |
| C | 6.124402000000  | 2.642096000000  | -0.085616000000 |
| H | -5.742111000000 | 0.018635000000  | 3.373239000000  |
| H | 6.324710000000  | 1.595537000000  | -0.020277000000 |
| C | 4.682911000000  | -0.691991000000 | -1.722615000000 |
| C | -1.796634000000 | 1.718868000000  | 5.616923000000  |
| C | 5.721319000000  | -1.292873000000 | -0.988115000000 |
| C | -3.009755000000 | 2.245852000000  | 5.129463000000  |
| C | 5.723943000000  | -1.271374000000 | 0.421679000000  |
| C | -2.968518000000 | 3.153996000000  | 4.054799000000  |
| C | -3.475631000000 | 2.318543000000  | -2.268770000000 |
| C | 3.274811000000  | -4.216693000000 | 0.165917000000  |
| H | -3.463146000000 | 2.267207000000  | -1.202130000000 |
| H | 3.637859000000  | -3.232778000000 | -0.039001000000 |
| C | -2.281553000000 | 2.590215000000  | -2.970386000000 |
| C | 1.903783000000  | -4.482690000000 | 0.086672000000  |
| H | -1.368009000000 | 2.725068000000  | -2.430728000000 |
| H | 1.213857000000  | -3.700553000000 | -0.149600000000 |
| C | -1.260231000000 | 9.484209000000  | -1.201526000000 |
| C | -0.563147000000 | -4.610751000000 | -2.795605000000 |
| H | -0.673816000000 | 10.270144000000 | -0.769422000000 |
| H | -1.596521000000 | -4.530182000000 | -2.525130000000 |
| H | -1.572438000000 | 9.770245000000  | -2.182480000000 |
| H | -0.183926000000 | -5.560121000000 | -2.476916000000 |
| H | -0.673683000000 | 8.592431000000  | -1.259431000000 |
| H | -0.009727000000 | -3.829294000000 | -2.313385000000 |
| C | 4.732317000000  | -0.545760000000 | -3.220861000000 |
| C | -1.762377000000 | 0.645536000000  | 6.720651000000  |

|   |                 |                 |                 |
|---|-----------------|-----------------|-----------------|
| H | -3.984338000000 | 10.709798000000 | -1.571165000000 |
| H | -0.399603000000 | -6.955817000000 | -4.564824000000 |
| H | 4.311164000000  | 0.415933000000  | -3.523331000000 |
| H | -1.452299000000 | -0.290531000000 | 6.296470000000  |
| H | 4.137566000000  | -1.323171000000 | -3.706065000000 |
| H | -1.067178000000 | 0.941091000000  | 7.476177000000  |
| C | 6.918573000000  | -1.797118000000 | 1.161501000000  |
| C | -4.253721000000 | 3.729455000000  | 3.430405000000  |
| H | 6.722432000000  | -1.832930000000 | 2.232962000000  |
| H | -4.204713000000 | 3.613595000000  | 2.367344000000  |
| H | 7.795217000000  | -1.165941000000 | 0.982189000000  |
| H | -5.105659000000 | 3.206635000000  | 3.808501000000  |
| H | 7.181552000000  | -2.800642000000 | 0.822420000000  |
| H | -4.338262000000 | 4.769672000000  | 3.672242000000  |
| C | 5.477441000000  | 4.137349000000  | 7.942347000000  |
| C | -2.382839000000 | -1.270224000000 | -3.931749000000 |
| H | 4.499532000000  | 4.489495000000  | 7.667798000000  |
| H | -1.781533000000 | -0.424934000000 | -4.206789000000 |
| H | 6.140004000000  | 4.281704000000  | 7.114539000000  |
| H | -2.173019000000 | -1.538590000000 | -2.917655000000 |
| H | 5.828300000000  | 4.684850000000  | 8.789642000000  |
| H | -2.151481000000 | -2.095564000000 | -4.571428000000 |
| C | -3.299342000000 | 8.245489000000  | -0.866767000000 |
| C | 0.934711000000  | -4.657218000000 | -4.636878000000 |
| C | 5.913535000000  | 1.830993000000  | 7.313992000000  |
| C | -4.754458000000 | -1.894392000000 | -3.681583000000 |
| C | -3.240254000000 | -2.079973000000 | 1.279963000000  |
| C | 5.559956000000  | 5.315892000000  | -0.210603000000 |
| C | -4.673677000000 | 2.226292000000  | -4.377256000000 |
| O | -5.928274000000 | 1.780073000000  | -2.340051000000 |
| O | 5.571678000000  | -4.861592000000 | 0.646727000000  |
| C | 3.699617000000  | -6.485987000000 | 0.746547000000  |
| C | -5.464600000000 | -1.205212000000 | 1.604811000000  |
| C | 6.718572000000  | 3.404562000000  | -1.052413000000 |
| O | 6.789119000000  | -1.866840000000 | -1.595140000000 |
| O | -4.266497000000 | 1.852905000000  | 5.707885000000  |
| C | -2.290379000000 | 2.669547000000  | -4.378507000000 |
| C | 1.453529000000  | -5.731407000000 | 0.302938000000  |
| H | 5.749284000000  | -0.612741000000 | -3.610756000000 |
| H | -2.734398000000 | 0.534665000000  | 7.150172000000  |
| C | -3.119818000000 | 6.893415000000  | -0.502771000000 |
| C | -4.400374000000 | 8.605079000000  | -1.675556000000 |
| C | 1.488448000000  | -5.940455000000 | -4.771801000000 |
| C | 1.742646000000  | -3.532710000000 | -4.898509000000 |
| C | 5.110778000000  | 0.994111000000  | 6.612291000000  |
| C | 7.253166000000  | 1.807719000000  | 7.111277000000  |

|   |                 |                 |                 |
|---|-----------------|-----------------|-----------------|
| C | -4.473704000000 | -3.212333000000 | -3.499340000000 |
| C | -6.069742000000 | -1.448632000000 | -3.481063000000 |
| H | -2.537252000000 | -2.680955000000 | 0.714878000000  |
| C | -4.555843000000 | -1.974982000000 | 0.870914000000  |
| C | 6.427133000000  | 4.725141000000  | -1.129032000000 |
| H | 5.341087000000  | 6.361931000000  | -0.276281000000 |
| C | -3.492329000000 | 2.518331000000  | -5.069112000000 |
| H | -5.586310000000 | 2.089737000000  | -4.919391000000 |
| C | -5.826628000000 | 1.202655000000  | -1.025081000000 |
| C | 6.509812000000  | -5.928202000000 | 0.875694000000  |
| H | 4.362081000000  | -7.287221000000 | 0.997880000000  |
| C | 2.315277000000  | -6.730096000000 | 0.638999000000  |
| O | -6.731150000000 | -1.155362000000 | 1.126944000000  |
| O | 7.672661000000  | 2.892126000000  | -2.011197000000 |
| C | 6.524652000000  | -3.026537000000 | -2.390453000000 |
| C | -4.680573000000 | 2.742442000000  | 6.762693000000  |
| O | -1.084061000000 | 2.876871000000  | -5.141628000000 |
| O | 0.070366000000  | -6.043619000000 | 0.150932000000  |
| C | -1.990947000000 | 6.445880000000  | 0.438076000000  |
| C | -4.047901000000 | 5.939767000000  | -0.912261000000 |
| C | -5.303609000000 | 7.633746000000  | -2.096871000000 |
| C | -4.659803000000 | 10.062888000000 | -2.087672000000 |
| C | 0.636478000000  | -7.214523000000 | -4.619274000000 |
| C | 2.848510000000  | -6.075347000000 | -5.037782000000 |
| C | 3.103876000000  | -3.702181000000 | -5.192534000000 |
| C | 1.144053000000  | -2.115438000000 | -4.851832000000 |
| C | 5.663619000000  | 0.099507000000  | 5.741865000000  |
| H | 4.053610000000  | 1.020022000000  | 6.748882000000  |
| C | 7.820616000000  | 0.896475000000  | 6.213454000000  |
| H | 7.876830000000  | 2.491508000000  | 7.655026000000  |
| H | -3.484032000000 | -3.586203000000 | -3.646364000000 |
| C | -5.498057000000 | -4.094389000000 | -3.113355000000 |
| H | -6.302224000000 | -0.413561000000 | -3.625249000000 |
| C | -7.078631000000 | -2.350822000000 | -3.101202000000 |
| H | -4.900010000000 | -2.484002000000 | -0.021373000000 |
| H | 6.875469000000  | 5.322825000000  | -1.894393000000 |
| H | -3.504070000000 | 2.620508000000  | -6.134373000000 |
| H | -5.144438000000 | 0.378596000000  | -1.033006000000 |
| H | -6.797152000000 | 0.857188000000  | -0.725019000000 |
| H | -5.482099000000 | 1.941709000000  | -0.333084000000 |
| H | 7.501432000000  | -5.517366000000 | 0.874978000000  |
| H | 6.309542000000  | -6.374723000000 | 1.826990000000  |
| H | 6.435028000000  | -6.672004000000 | 0.111696000000  |
| H | 1.932520000000  | -7.715724000000 | 0.811014000000  |
| C | -7.666254000000 | -0.361544000000 | 1.829734000000  |
| C | 7.814379000000  | 1.464296000000  | -2.088073000000 |

|   |                |                |                |
|---|----------------|----------------|----------------|
| H | 5.66647000000  | -3.57647500000 | -1.99681200000 |
| H | 7.40983400000  | -3.65826600000 | -2.31659100000 |
| H | 6.34535400000  | -2.76171800000 | -3.43605200000 |
| H | -3.94477600000 | 2.75313400000  | 7.54035600000  |
| H | -5.61428500000 | 2.40120000000  | 7.16107400000  |
| H | -4.79980000000 | 3.73311300000  | 6.37465700000  |
| C | -0.18760200000 | 3.83263400000  | -4.58746400000 |
| C | -0.88729200000 | -5.66986900000 | 1.16737500000  |
| H | -2.42466100000 | 5.99151100000  | 1.30599000000  |
| H | -1.40740100000 | 7.29072000000  | 0.73083600000  |
| H | -1.36613400000 | 5.73590100000  | -0.06121700000 |
| H | -3.91018700000 | 4.90919600000  | -0.64303700000 |
| C | -5.14917400000 | 6.32556100000  | -1.67901600000 |
| H | -6.13030400000 | 7.89911900000  | -2.72179600000 |
| H | -5.66905700000 | 10.32319200000 | -1.83156900000 |
| H | -4.52147300000 | 10.16741900000 | -3.14160200000 |
| H | 0.92678500000  | -7.72287200000 | -3.72483800000 |
| H | 0.79825800000  | -7.85537200000 | -5.46359600000 |
| H | 3.27832700000  | -7.05107800000 | -5.12846600000 |
| C | 3.65100700000  | -4.94057600000 | -5.18498400000 |
| H | 3.71691500000  | -2.84998000000 | -5.40505500000 |
| H | 0.26599700000  | -2.07755700000 | -5.46109200000 |
| H | 0.89111300000  | -1.87666300000 | -3.84144800000 |
| H | 1.86081100000  | -1.40703800000 | -5.21768900000 |
| H | 5.03660100000  | -0.58044500000 | 5.20730800000  |
| C | 7.00363800000  | 0.04156900000  | 5.54604800000  |
| H | 8.88282700000  | 0.87282000000  | 6.06883500000  |
| C | -6.76757300000 | -3.66443900000 | -2.92517400000 |
| H | -5.28106500000 | -5.13202900000 | -2.96622700000 |
| H | -8.07963500000 | -2.00044900000 | -2.95539900000 |
| H | -7.78546100000 | -0.69068300000 | 2.86709200000  |
| H | -8.60792400000 | -0.49636200000 | 1.31009900000  |
| H | -7.38735900000 | 0.69761800000  | 1.81838300000  |
| H | 8.50288800000  | 1.23172200000  | -2.87771300000 |
| H | 8.19825500000  | 1.09635700000  | -1.16017500000 |
| H | 6.87289800000  | 1.00072100000  | -2.29173800000 |
| C | -0.67148500000 | 5.23535700000  | -4.20941600000 |
| C | 1.16577500000  | 3.48451900000  | -4.38444500000 |
| C | -0.61089600000 | -5.17280300000 | 2.49211200000  |
| C | -2.21736100000 | -5.85556300000 | 0.77448100000  |
| C | -6.22503900000 | 5.31919400000  | -2.03199400000 |
| C | 5.17126700000  | -5.06650500000 | -5.31505300000 |
| O | 7.50406200000  | -0.96128400000 | 4.64919400000  |
| O | -7.72639600000 | -4.66524200000 | -2.54791000000 |
| N | -1.90886500000 | 5.71646500000  | -4.43442500000 |
| C | 0.17261700000  | 6.10158700000  | -3.63149900000 |

|   |                  |                 |                 |
|---|------------------|-----------------|-----------------|
| C | 2.100024000000   | 4.465231000000  | -3.626741000000 |
| C | -1.679966000000  | -4.941917000000 | 3.355393000000  |
| C | -3.233341000000  | -5.629367000000 | 1.626458000000  |
| N | -2.584778000000  | -6.306634000000 | -0.448314000000 |
| C | -6.832241000000  | 4.576213000000  | -0.839920000000 |
| C | -6.669839000000  | 5.092624000000  | -3.310013000000 |
| C | 5.878041000000   | -5.783663000000 | -4.363947000000 |
| C | 5.844888000000   | -4.425052000000 | -6.374575000000 |
| C | 8.684319000000   | -0.628579000000 | 3.906976000000  |
| C | -8.906104000000  | -4.201727000000 | -1.881745000000 |
| N | -0.332803000000  | 7.333091000000  | -3.405059000000 |
| C | 1.598989000000   | 5.696286000000  | -3.267521000000 |
| C | -2.971876000000  | -5.214083000000 | 2.938116000000  |
| N | -4.463235000000  | -5.903246000000 | 1.126621000000  |
| N | -6.423736000000  | 4.760035000000  | 0.432831000000  |
| C | -7.869748000000  | 3.724838000000  | -1.001561000000 |
| C | -7.831571000000  | 4.096640000000  | -3.525986000000 |
| C | 7.250797000000   | -5.884872000000 | -4.463541000000 |
| C | 7.193899000000   | -4.490653000000 | -6.468930000000 |
| N | 5.242071000000   | -3.714529000000 | -7.358546000000 |
| C | 9.713252000000   | -1.509856000000 | 3.994025000000  |
| C | 8.805059000000   | 0.512246000000  | 3.125683000000  |
| C | -8.919269000000  | -3.972397000000 | -0.481220000000 |
| C | -10.071318000000 | -4.006322000000 | -2.633397000000 |
| C | 2.374675000000   | 6.742121000000  | -2.502537000000 |
| C | -4.155111000000  | -5.099551000000 | 3.904068000000  |
| N | -8.362661000000  | 3.221615000000  | 0.150408000000  |
| C | -8.403846000000  | 3.430038000000  | -2.423258000000 |
| C | 7.931254000000   | -5.203800000000 | -5.511367000000 |
| N | 7.725621000000   | -3.830635000000 | -7.521881000000 |
| N | 9.668131000000   | -2.651883000000 | 4.717795000000  |
| C | 10.880874000000  | -1.298864000000 | 3.349750000000  |
| C | 10.024417000000  | 0.749930000000  | 2.426478000000  |
| C | -10.100317000000 | -3.578330000000 | 0.131714000000  |
| C | -11.211975000000 | -3.616302000000 | -2.026516000000 |
| N | -10.178130000000 | -4.213012000000 | -3.967425000000 |
| C | 1.927822000000   | 7.027042000000  | -1.216057000000 |
| C | 3.471897000000   | 7.393795000000  | -3.040326000000 |
| C | -4.081793000000  | -5.787689000000 | 5.115856000000  |
| C | -5.252043000000  | -4.370909000000 | 3.585524000000  |
| O | -9.462664000000  | 2.507538000000  | -2.697870000000 |
| O | 9.359002000000   | -5.256675000000 | -5.560092000000 |
| N | 11.818433000000  | -2.256079000000 | 3.542410000000  |
| C | 11.047981000000  | -0.176507000000 | 2.539208000000  |
| C | -11.243669000000 | -3.405699000000 | -0.638985000000 |
| N | -12.282610000000 | -3.504843000000 | -2.847150000000 |

|   |                  |                 |                 |
|---|------------------|-----------------|-----------------|
| H | 1.077711000000   | 6.505968000000  | -0.820875000000 |
| C | 2.601136000000   | 7.950216000000  | -0.429014000000 |
| H | 3.790980000000   | 7.178981000000  | -4.039285000000 |
| C | 4.137537000000   | 8.355809000000  | -2.278157000000 |
| C | -5.119658000000  | -5.706578000000 | 6.037858000000  |
| H | -3.225155000000  | -6.393047000000 | 5.332136000000  |
| C | -6.305458000000  | -4.252961000000 | 4.503960000000  |
| H | -5.313654000000  | -3.881564000000 | 2.635419000000  |
| C | -10.253832000000 | 2.139761000000  | -1.570192000000 |
| C | 9.931180000000   | -4.518519000000 | -4.462435000000 |
| C | 12.372298000000  | -0.025941000000 | 1.791058000000  |
| C | -12.576084000000 | -2.985075000000 | -0.009022000000 |
| C | 2.080955000000   | 8.210614000000  | 0.997776000000  |
| C | 3.724203000000   | 8.622649000000  | -0.950906000000 |
| C | 5.297822000000   | 9.122103000000  | -2.930431000000 |
| C | -5.015170000000  | -6.518779000000 | 7.342406000000  |
| C | -6.231101000000  | -4.897969000000 | 5.755166000000  |
| C | -7.543535000000  | -3.421280000000 | 4.128893000000  |
| C | -10.083881000000 | 0.871495000000  | -0.997972000000 |
| C | -11.201196000000 | 3.021406000000  | -1.055490000000 |
| C | 10.860231000000  | -5.165018000000 | -3.720943000000 |
| C | 9.570735000000   | -3.243605000000 | -4.143554000000 |
| C | 12.359273000000  | 0.084455000000  | 0.408370000000  |
| C | 13.580657000000  | -0.009426000000 | 2.493123000000  |
| C | -13.104317000000 | -3.697667000000 | 1.067666000000  |
| C | -13.223683000000 | -1.912059000000 | -0.513003000000 |
| H | 1.020201000000   | 8.360047000000  | 0.962492000000  |
| H | 2.550689000000   | 9.081756000000  | 1.399052000000  |
| H | 2.300497000000   | 7.367223000000  | 1.619514000000  |
| O | 4.389759000000   | 9.615488000000  | -0.158005000000 |
| H | 4.962085000000   | 9.547037000000  | -3.858335000000 |
| H | 5.624440000000   | 9.905441000000  | -2.281240000000 |
| H | 6.104207000000   | 8.449466000000  | -3.117793000000 |
| H | -4.223080000000  | -6.126014000000 | 7.943221000000  |
| H | -5.936615000000  | -6.459138000000 | 7.881131000000  |
| H | -4.808173000000  | -7.543760000000 | 7.103523000000  |
| O | -7.286576000000  | -4.741481000000 | 6.718600000000  |
| H | -8.423180000000  | -4.006989000000 | 4.291747000000  |
| H | -7.580812000000  | -2.541381000000 | 4.734599000000  |
| H | -7.487662000000  | -3.140483000000 | 3.096118000000  |
| H | -9.356736000000  | 0.198860000000  | -1.407466000000 |
| C | -10.869512000000 | 0.478852000000  | 0.099332000000  |
| H | -11.329369000000 | 3.986049000000  | -1.501143000000 |
| C | -11.982878000000 | 2.638276000000  | 0.040628000000  |
| C | 11.429791000000  | -4.574759000000 | -2.576187000000 |
| H | 11.154302000000  | -6.150115000000 | -4.015797000000 |

|   |                  |                 |                 |
|---|------------------|-----------------|-----------------|
| C | 10.122251000000  | -2.633279000000 | -3.001409000000 |
| H | 8.875148000000   | -2.704708000000 | -4.753238000000 |
| H | 11.428698000000  | 0.043639000000  | -0.118891000000 |
| C | 13.552183000000  | 0.224488000000  | -0.295378000000 |
| H | 13.585899000000  | -0.101927000000 | 3.561027000000  |
| C | 14.782506000000  | 0.170143000000  | 1.805045000000  |
| C | -14.283943000000 | -3.271211000000 | 1.675958000000  |
| H | -12.609335000000 | -4.578682000000 | 1.423017000000  |
| C | -14.397703000000 | -1.447410000000 | 0.082310000000  |
| H | -12.816215000000 | -1.392150000000 | -1.355287000000 |
| C | 5.418835000000   | 9.088775000000  | 0.669914000000  |
| C | -7.027857000000  | -3.680562000000 | 7.658687000000  |
| C | -11.821428000000 | 1.372205000000  | 0.628643000000  |
| H | -10.740318000000 | -0.493358000000 | 0.522613000000  |
| H | -12.713475000000 | 3.313580000000  | 0.433965000000  |
| H | 12.147775000000  | -5.121417000000 | -2.003344000000 |
| C | 11.054573000000  | -3.318713000000 | -2.208464000000 |
| H | 9.835292000000   | -1.636859000000 | -2.732010000000 |
| C | 13.491541000000  | 0.244136000000  | -1.834161000000 |
| C | 14.775932000000  | 0.316318000000  | 0.400007000000  |
| C | 16.092820000000  | 0.188020000000  | 2.613914000000  |
| C | -14.859538000000 | -4.109670000000 | 2.832074000000  |
| C | -14.924517000000 | -2.105916000000 | 1.210891000000  |
| C | -15.090014000000 | -0.215292000000 | -0.530281000000 |
| H | 5.010058000000   | 8.346508000000  | 1.320760000000  |
| H | 5.836310000000   | 9.884933000000  | 1.252219000000  |
| H | 6.181748000000   | 8.651889000000  | 0.063387000000  |
| H | -6.131082000000  | -3.891884000000 | 8.203629000000  |
| H | -7.851301000000  | -3.611396000000 | 8.340081000000  |
| H | -6.916062000000  | -2.749979000000 | 7.140828000000  |
| O | -12.661982000000 | 1.054323000000  | 1.759472000000  |
| O | 11.570399000000  | -2.632812000000 | -1.041337000000 |
| H | 12.929128000000  | -0.605847000000 | -2.174386000000 |
| H | 14.480858000000  | 0.196545000000  | -2.236643000000 |
| H | 13.013860000000  | 1.140660000000  | -2.160319000000 |
| O | 16.005270000000  | 0.486902000000  | -0.318327000000 |
| H | 16.120090000000  | -0.672597000000 | 3.252074000000  |
| H | 16.929314000000  | 0.164889000000  | 1.948837000000  |
| H | 16.134954000000  | 1.075331000000  | 3.209916000000  |
| H | -14.198050000000 | -4.058135000000 | 3.668125000000  |
| H | -15.821042000000 | -3.733695000000 | 3.109859000000  |
| H | -14.956786000000 | -5.131069000000 | 2.514436000000  |
| O | -16.125278000000 | -1.627297000000 | 1.831729000000  |
| H | -16.068536000000 | -0.105423000000 | -0.114272000000 |
| H | -14.512052000000 | 0.659830000000  | -0.320535000000 |
| H | -15.166412000000 | -0.346941000000 | -1.591248000000 |



|   |                  |                 |                 |
|---|------------------|-----------------|-----------------|
| C | -12.173208000000 | 0.029249000000  | 2.642987000000  |
| C | 12.314062000000  | -3.425466000000 | -0.096783000000 |
| C | 16.352677000000  | 1.852113000000  | -0.507263000000 |
| C | -15.865393000000 | -0.665455000000 | 2.848129000000  |
| H | -12.817272000000 | -0.018974000000 | 3.499382000000  |
| H | -11.177479000000 | 0.257131000000  | 2.960055000000  |
| H | -12.177779000000 | -0.915244000000 | 2.140503000000  |
| H | 12.543063000000  | -2.815953000000 | 0.756654000000  |
| H | 11.744417000000  | -4.274148000000 | 0.218469000000  |
| H | 13.222624000000  | -3.757254000000 | -0.552351000000 |
| H | 15.584214000000  | 2.343830000000  | -1.063429000000 |
| H | 17.275346000000  | 1.904495000000  | -1.047944000000 |
| H | 16.467401000000  | 2.327719000000  | 0.442406000000  |
| H | -15.270292000000 | -1.107817000000 | 3.617477000000  |
| H | -16.795856000000 | -0.334061000000 | 3.261212000000  |
| H | -15.344412000000 | 0.167689000000  | 2.427461000000  |
| S | 11.112870000000  | -3.508686000000 | 4.451854000000  |
| S | -7.377663000000  | 3.771717000000  | 1.428587000000  |
| S | -1.891308000000  | 7.379339000000  | -4.076826000000 |
| S | -4.281769000000  | -6.390960000000 | -0.494587000000 |
| S | 6.443470000000   | -3.222529000000 | -8.461243000000 |
| S | -11.767413000000 | -3.821454000000 | -4.436538000000 |
| C | 0.804220000000   | 0.154039000000  | -1.092376000000 |
| C | -1.496440000000  | -0.226229000000 | 0.054529000000  |
| C | 8.073295000000   | -6.707933000000 | -3.417827000000 |
| C | 5.121514000000   | -6.405878000000 | -3.141226000000 |
| C | -7.603411000000  | -4.167872000000 | 0.334439000000  |
| C | -10.117082000000 | -3.293423000000 | 1.667360000000  |
| C | 0.836364000000   | -4.888021000000 | 2.985848000000  |
| C | -1.421876000000  | -4.347838000000 | 4.784310000000  |
| C | 4.120160000000   | 5.068927000000  | 4.556334000000  |
| C | 1.646809000000   | 3.987763000000  | 5.822107000000  |
| C | 10.219989000000  | 2.057492000000  | 1.584675000000  |
| C | 7.612784000000   | 1.509337000000  | 3.011285000000  |
| C | -6.019238000000  | 5.776475000000  | -4.545622000000 |
| C | -8.374997000000  | 3.802103000000  | -4.948420000000 |
| C | 3.535085000000   | 4.007418000000  | -3.226736000000 |
| C | 1.687436000000   | 2.120353000000  | -4.906698000000 |
| N | -2.383758000000  | -0.014942000000 | -0.655230000000 |
| N | 0.596551000000   | 0.412463000000  | -2.203504000000 |
| N | -6.619310000000  | -4.315488000000 | 0.928314000000  |
| N | -10.125084000000 | -3.083626000000 | 2.805076000000  |
| N | -1.250543000000  | -3.910739000000 | 5.845082000000  |
| N | 1.913754000000   | -4.678922000000 | 3.340512000000  |
| N | 4.562349000000   | -6.865754000000 | -2.237505000000 |
| N | 8.693220000000   | -7.313890000000 | -2.652400000000 |

|   |                 |                |                 |
|---|-----------------|----------------|-----------------|
| N | -5.527037000000 | 6.288488000000 | -5.451883000000 |
| N | -8.778625000000 | 3.583173000000 | -6.003110000000 |
| N | 4.596745000000  | 3.674633000000 | -2.928537000000 |
| N | 2.062236000000  | 1.107792000000 | -5.298848000000 |
| N | 10.352030000000 | 3.028943000000 | 0.963161000000  |
| N | 6.739637000000  | 2.262021000000 | 2.918944000000  |
| N | 5.015596000000  | 5.467867000000 | 5.177610000000  |
| N | 1.554732000000  | 3.964343000000 | 6.973451000000  |

NB:

|   |                 |                 |                 |
|---|-----------------|-----------------|-----------------|
| S | 2.290191000000  | 0.022556000000  | 5.043173000000  |
| S | 0.916982000000  | 3.107754000000  | -0.779791000000 |
| O | -1.791448000000 | -0.113242000000 | 3.613816000000  |
| O | 4.558134000000  | 5.279208000000  | 1.092964000000  |
| O | -1.797877000000 | 9.235092000000  | -1.097478000000 |
| O | -0.757997000000 | -4.789714000000 | -3.625728000000 |
| N | 2.826687000000  | 0.068616000000  | 3.503933000000  |
| N | 0.363547000000  | 3.183917000000  | 0.904475000000  |
| O | 5.554798000000  | 3.794809000000  | 7.570701000000  |
| O | -3.652114000000 | -1.001175000000 | -3.816804000000 |
| N | 0.691460000000  | -0.126731000000 | 4.768595000000  |
| N | 2.431226000000  | 3.849426000000  | -0.236870000000 |
| C | 1.780434000000  | -0.056385000000 | 2.703076000000  |
| C | 1.286601000000  | 3.751376000000  | 1.701644000000  |
| C | 0.549246000000  | -0.146544000000 | 3.451295000000  |
| C | 2.408808000000  | 4.096788000000  | 1.083495000000  |
| C | 1.794452000000  | -0.186757000000 | 1.250301000000  |
| C | 1.087552000000  | 4.015331000000  | 3.075321000000  |
| C | 0.526912000000  | -0.236211000000 | 0.701299000000  |
| C | 2.087517000000  | 4.656342000000  | 3.766708000000  |
| C | -0.685534000000 | -0.172933000000 | 2.783697000000  |
| C | 3.449835000000  | 4.729828000000  | 1.775216000000  |
| C | -0.715625000000 | -0.072768000000 | 1.413996000000  |
| C | 3.251303000000  | 5.019378000000  | 3.145670000000  |
| C | 3.063716000000  | -0.403338000000 | 0.502519000000  |
| C | -0.204456000000 | 3.620851000000  | 3.731105000000  |
| C | 4.238314000000  | -0.798843000000 | 1.171922000000  |
| C | -1.384725000000 | 3.919844000000  | 3.145466000000  |
| H | 4.279560000000  | -0.790338000000 | 2.248630000000  |
| H | -1.396729000000 | 4.437486000000  | 2.199377000000  |
| C | -2.944922000000 | -0.654106000000 | 3.276236000000  |
| C | 5.289261000000  | 4.456164000000  | 0.211960000000  |
| C | 3.113163000000  | -0.373913000000 | -0.899422000000 |
| C | -0.204530000000 | 2.932035000000  | 4.958596000000  |
| H | 2.315766000000  | 0.056827000000  | -1.485253000000 |
| H | 0.733490000000  | 2.676403000000  | 5.432659000000  |

|   |                 |                 |                 |
|---|-----------------|-----------------|-----------------|
| C | -4.048956000000 | -0.163849000000 | 4.024370000000  |
| C | 5.400667000000  | 3.116224000000  | 0.370242000000  |
| H | -3.850451000000 | 0.311390000000  | 4.972705000000  |
| H | 4.905565000000  | 2.622993000000  | 1.193176000000  |
| C | -4.375362000000 | 2.013600000000  | -2.871232000000 |
| C | 3.727356000000  | -5.089232000000 | 1.206687000000  |
| C | -5.288288000000 | -0.209506000000 | 3.473980000000  |
| C | 6.196142000000  | 2.359340000000  | -0.514658000000 |
| H | -6.128048000000 | 0.242195000000  | 3.983922000000  |
| H | 6.282386000000  | 1.301159000000  | -0.345865000000 |
| C | 4.184266000000  | -0.898478000000 | -1.608672000000 |
| C | -1.402966000000 | 2.576655000000  | 5.591928000000  |
| C | 5.289450000000  | -1.363203000000 | -0.897707000000 |
| C | -2.628408000000 | 2.933846000000  | 4.988989000000  |
| C | 5.356120000000  | -1.262513000000 | 0.491079000000  |
| C | -2.612857000000 | 3.577717000000  | 3.731843000000  |
| C | -3.125780000000 | 2.161709000000  | -2.246320000000 |
| C | 2.762642000000  | -4.107364000000 | 0.948366000000  |
| H | -3.035753000000 | 2.149455000000  | -1.173880000000 |
| H | 3.067595000000  | -3.082053000000 | 0.853162000000  |
| C | -1.964756000000 | 2.284370000000  | -3.011474000000 |
| C | 1.413584000000  | -4.463833000000 | 0.798215000000  |
| H | -1.006536000000 | 2.307728000000  | -2.521494000000 |
| H | 0.669034000000  | -3.707250000000 | 0.602720000000  |
| C | -0.674001000000 | 9.298798000000  | -1.981760000000 |
| C | -0.963690000000 | -4.709817000000 | -2.207065000000 |
| H | -0.003077000000 | 10.126109000000 | -1.666348000000 |
| H | -2.011240000000 | -4.426533000000 | -1.983349000000 |
| H | -0.990151000000 | 9.495160000000  | -3.031260000000 |
| H | -0.776275000000 | -5.681167000000 | -1.700464000000 |
| H | -0.088385000000 | 8.356095000000  | -1.951689000000 |
| H | -0.299346000000 | -3.948297000000 | -1.750885000000 |
| C | 4.113018000000  | -1.024756000000 | -3.103594000000 |
| C | -1.336193000000 | 1.822380000000  | 6.894954000000  |
| H | -3.234875000000 | 10.620351000000 | -2.541524000000 |
| H | -0.942124000000 | -7.304406000000 | -3.438408000000 |
| H | 3.500875000000  | -0.235846000000 | -3.534062000000 |
| H | -0.818989000000 | 0.850322000000  | 6.741586000000  |
| H | 3.652223000000  | -1.980794000000 | -3.370674000000 |
| H | -0.778883000000 | 2.417502000000  | 7.648690000000  |
| C | 6.606640000000  | -1.685472000000 | 1.209782000000  |
| C | -3.879743000000 | 3.905210000000  | 2.986316000000  |
| H | 6.468312000000  | -1.644559000000 | 2.291102000000  |
| H | -3.867385000000 | 3.419574000000  | 1.988324000000  |
| H | 7.442838000000  | -1.031116000000 | 0.943262000000  |
| H | -4.777163000000 | 3.527300000000  | 3.519855000000  |

|   |                 |                 |                 |
|---|-----------------|-----------------|-----------------|
| H | 6.899732000000  | -2.701126000000 | 0.936345000000  |
| H | -3.982054000000 | 5.002350000000  | 2.856494000000  |
| C | 5.715777000000  | 5.112923000000  | 7.021686000000  |
| C | -2.278515000000 | -1.385133000000 | -3.642113000000 |
| H | 4.714061000000  | 5.569152000000  | 6.845631000000  |
| H | -1.614804000000 | -0.523192000000 | -3.874448000000 |
| H | 6.258905000000  | 5.133302000000  | 6.049492000000  |
| H | -2.063725000000 | -1.668671000000 | -2.586798000000 |
| H | 6.260178000000  | 5.754020000000  | 7.744917000000  |
| H | -1.998351000000 | -2.207745000000 | -4.331640000000 |
| C | -2.731150000000 | 8.234713000000  | -1.435944000000 |
| C | 0.563585000000  | -5.143350000000 | -3.966946000000 |
| C | 6.092110000000  | 2.755452000000  | 6.803160000000  |
| C | -4.654355000000 | -1.918118000000 | -3.439857000000 |
| C | -3.151106000000 | -1.548995000000 | 2.206098000000  |
| C | 5.968306000000  | 5.052685000000  | -0.782515000000 |
| C | -4.436810000000 | 2.043865000000  | -4.268023000000 |
| O | -5.578638000000 | 1.824091000000  | -2.160538000000 |
| O | 5.074061000000  | -4.671026000000 | 1.334643000000  |
| C | 3.319201000000  | -6.380051000000 | 1.297460000000  |
| C | -5.445585000000 | -0.817109000000 | 2.198046000000  |
| C | 6.862748000000  | 2.967762000000  | -1.531363000000 |
| O | 6.368615000000  | -1.890691000000 | -1.566240000000 |
| O | -3.849817000000 | 2.637333000000  | 5.624723000000  |
| C | -2.028731000000 | 2.310490000000  | -4.412088000000 |
| C | 1.038365000000  | -5.749936000000 | 0.926928000000  |
| H | 5.099463000000  | -0.999252000000 | -3.568710000000 |
| H | -2.348932000000 | 1.602545000000  | 7.291911000000  |
| C | -2.630715000000 | 6.941928000000  | -0.864894000000 |
| C | -3.836306000000 | 8.546879000000  | -2.264453000000 |
| C | 1.032425000000  | -6.471009000000 | -3.807404000000 |
| C | 1.450924000000  | -4.154701000000 | -4.450871000000 |
| C | 5.268855000000  | 1.807734000000  | 6.314620000000  |
| C | 7.423252000000  | 2.655836000000  | 6.604281000000  |
| C | -4.462469000000 | -3.255183000000 | -3.360698000000 |
| C | -5.928858000000 | -1.412268000000 | -3.169633000000 |
| H | -2.324318000000 | -2.080927000000 | 1.760057000000  |
| C | -4.393095000000 | -1.568851000000 | 1.628876000000  |
| C | 6.760363000000  | 4.300037000000  | -1.665931000000 |
| H | 5.899927000000  | 6.118218000000  | -0.901010000000 |
| C | -3.270508000000 | 2.180137000000  | -5.035712000000 |
| H | -5.396409000000 | 1.927143000000  | -4.748801000000 |
| C | -5.486962000000 | 1.355437000000  | -0.804396000000 |
| C | 6.092581000000  | -5.678150000000 | 1.437178000000  |
| H | 4.016837000000  | -7.182114000000 | 1.477825000000  |
| C | 1.960433000000  | -6.706153000000 | 1.138789000000  |

|   |                 |                 |                 |
|---|-----------------|-----------------|-----------------|
| O | -6.575782000000 | -0.759188000000 | 1.510085000000  |
| O | 7.688794000000  | 2.290882000000  | -2.458350000000 |
| C | 6.199056000000  | -3.257747000000 | -1.919327000000 |
| C | -4.325222000000 | 3.705309000000  | 6.450539000000  |
| O | -0.867243000000 | 2.385722000000  | -5.198153000000 |
| O | -0.288881000000 | -6.137998000000 | 0.725485000000  |
| C | -1.528863000000 | 6.571822000000  | 0.092439000000  |
| C | -3.615496000000 | 5.982375000000  | -1.140412000000 |
| C | -4.811672000000 | 7.572651000000  | -2.515828000000 |
| C | -4.023406000000 | 9.912693000000  | -2.873858000000 |
| C | 0.126040000000  | -7.612049000000 | -3.421178000000 |
| C | 2.392244000000  | -6.738274000000 | -4.013319000000 |
| C | 2.796791000000  | -4.485931000000 | -4.684398000000 |
| C | 0.985957000000  | -2.738212000000 | -4.667716000000 |
| C | 5.758130000000  | 0.766458000000  | 5.597310000000  |
| H | 4.205808000000  | 1.905929000000  | 6.497541000000  |
| C | 7.933787000000  | 1.572532000000  | 5.865071000000  |
| H | 8.088662000000  | 3.397655000000  | 7.024788000000  |
| H | -3.514292000000 | -3.699915000000 | -3.616733000000 |
| C | -5.519468000000 | -4.101905000000 | -2.972426000000 |
| H | -6.103814000000 | -0.350484000000 | -3.265235000000 |
| C | -6.964649000000 | -2.277137000000 | -2.779284000000 |
| H | -4.579402000000 | -2.115517000000 | 0.713331000000  |
| H | 7.288362000000  | 4.782599000000  | -2.475938000000 |
| H | -3.319210000000 | 2.190548000000  | -6.115936000000 |
| H | -4.859205000000 | 0.438691000000  | -0.735254000000 |
| H | -6.500889000000 | 1.097962000000  | -0.425588000000 |
| H | -5.084904000000 | 2.138675000000  | -0.125168000000 |
| H | 7.093632000000  | -5.197306000000 | 1.446203000000  |
| H | 5.990794000000  | -6.253020000000 | 2.383528000000  |
| H | 6.071570000000  | -6.367311000000 | 0.559481000000  |
| H | 1.638118000000  | -7.736075000000 | 1.202785000000  |
| C | -7.633661000000 | 0.092814000000  | 1.950844000000  |
| C | 7.699185000000  | 0.859902000000  | -2.458250000000 |
| H | 5.945392000000  | -3.861786000000 | -1.045340000000 |
| H | 7.151259000000  | -3.594633000000 | -2.321796000000 |
| H | 5.418316000000  | -3.380446000000 | -2.677187000000 |
| H | -3.599594000000 | 3.937976000000  | 7.262868000000  |
| H | -5.284681000000 | 3.404852000000  | 6.923275000000  |
| H | -4.511317000000 | 4.625552000000  | 5.851819000000  |
| C | 0.104006000000  | 3.288419000000  | -4.722648000000 |
| C | -1.330435000000 | -5.661502000000 | 1.566477000000  |
| H | -1.975211000000 | 6.347560000000  | 1.081114000000  |
| H | -0.816490000000 | 7.408820000000  | 0.237485000000  |
| H | -0.972697000000 | 5.686479000000  | -0.285251000000 |
| H | -3.540512000000 | 4.997428000000  | -0.695114000000 |

|   |                 |                 |                 |
|---|-----------------|-----------------|-----------------|
| C | -4.717982000000 | 6.292896000000  | -1.949057000000 |
| H | -5.664097000000 | 7.823782000000  | -3.136426000000 |
| H | -5.004764000000 | 10.332387000000 | -2.568628000000 |
| H | -3.985864000000 | 9.833725000000  | -3.981741000000 |
| H | 0.381709000000  | -7.969298000000 | -2.400597000000 |
| H | 0.239261000000  | -8.448160000000 | -4.142832000000 |
| H | 2.779009000000  | -7.732812000000 | -3.823383000000 |
| C | 3.269236000000  | -5.721978000000 | -4.427782000000 |
| H | 3.480658000000  | -3.722854000000 | -5.033707000000 |
| H | 0.132304000000  | -2.734327000000 | -5.375173000000 |
| H | 0.662065000000  | -2.295411000000 | -3.699793000000 |
| H | 1.778228000000  | -2.086940000000 | -5.093410000000 |
| H | 5.092598000000  | 0.016811000000  | 5.190453000000  |
| C | 7.079678000000  | 0.649774000000  | 5.351747000000  |
| H | 9.000650000000  | 1.482215000000  | 5.716618000000  |
| C | -6.740057000000 | -3.614454000000 | -2.679874000000 |
| H | -5.363629000000 | -5.170940000000 | -2.903144000000 |
| H | -7.935842000000 | -1.852683000000 | -2.573580000000 |
| H | -8.026795000000 | -0.219303000000 | 2.920247000000  |
| H | -8.410146000000 | -0.016192000000 | 1.202026000000  |
| H | -7.295110000000 | 1.130167000000  | 2.002646000000  |
| H | 8.347099000000  | 0.502633000000  | -3.284243000000 |
| H | 8.110543000000  | 0.452708000000  | -1.509209000000 |
| H | 6.680190000000  | 0.466900000000  | -2.637256000000 |
| C | -0.232087000000 | 4.712513000000  | -4.542795000000 |
| C | 1.434693000000  | 2.887660000000  | -4.492872000000 |
| C | -1.178520000000 | -5.077553000000 | 2.867316000000  |
| C | -2.637780000000 | -5.877367000000 | 1.113184000000  |
| C | -5.826564000000 | 5.313500000000  | -2.116447000000 |
| C | 4.732000000000  | -5.981239000000 | -4.493979000000 |
| O | 7.519422000000  | -0.458321000000 | 4.600370000000  |
| O | -7.727964000000 | -4.549466000000 | -2.309111000000 |
| N | -1.425823000000 | 5.241414000000  | -4.862857000000 |
| C | 0.656828000000  | 5.574718000000  | -4.085442000000 |
| C | 2.409014000000  | 3.871192000000  | -3.911189000000 |
| C | -2.280974000000 | -4.762377000000 | 3.612401000000  |
| C | -3.690533000000 | -5.581965000000 | 1.862544000000  |
| N | -2.926712000000 | -6.415092000000 | -0.087076000000 |
| C | -6.472761000000 | 4.746230000000  | -0.909138000000 |
| C | -6.319278000000 | 4.981902000000  | -3.337583000000 |
| C | 5.432423000000  | -6.369094000000 | -3.380962000000 |
| C | 5.424555000000  | -5.791938000000 | -5.706122000000 |
| C | 8.660812000000  | -0.288075000000 | 3.782989000000  |
| C | -8.944849000000 | -4.057227000000 | -1.806857000000 |
| N | 0.223540000000  | 6.845388000000  | -4.010479000000 |
| C | 2.021258000000  | 5.159522000000  | -3.695526000000 |

|   |                  |                 |                 |
|---|------------------|-----------------|-----------------|
| C | -3.542617000000  | -5.031937000000 | 3.149404000000  |
| N | -4.878487000000  | -5.881427000000 | 1.305921000000  |
| N | -6.046180000000  | 5.002015000000  | 0.342070000000  |
| C | -7.523505000000  | 3.939609000000  | -0.984830000000 |
| C | -7.503865000000  | 4.081265000000  | -3.457457000000 |
| C | 6.782487000000   | -6.555412000000 | -3.442247000000 |
| C | 6.738759000000   | -5.960352000000 | -5.783295000000 |
| N | 4.835589000000   | -5.412005000000 | -6.854354000000 |
| C | 9.652272000000   | -1.202703000000 | 3.861899000000  |
| C | 8.770092000000   | 0.739268000000  | 2.883068000000  |
| C | -9.147476000000  | -3.879172000000 | -0.419524000000 |
| C | -10.015623000000 | -3.816775000000 | -2.670288000000 |
| C | 2.846459000000   | 6.143884000000  | -2.953937000000 |
| C | -4.743101000000  | -4.831603000000 | 4.012047000000  |
| N | -7.969380000000  | 3.493299000000  | 0.206354000000  |
| C | -8.109687000000  | 3.556576000000  | -2.302252000000 |
| C | 7.483749000000   | -6.315665000000 | -4.654920000000 |
| N | 7.277500000000   | -5.711760000000 | -6.990107000000 |
| N | 9.606656000000   | -2.275429000000 | 4.673613000000  |
| C | 10.758248000000  | -1.108812000000 | 3.125615000000  |
| C | 9.955268000000   | 0.879357000000  | 2.110826000000  |
| C | -10.357657000000 | -3.453007000000 | 0.047479000000  |
| C | -11.180724000000 | -3.392288000000 | -2.202334000000 |
| N | -9.950999000000  | -3.964065000000 | -4.005337000000 |
| C | 2.400032000000   | 6.610120000000  | -1.709638000000 |
| C | 3.963676000000   | 6.741213000000  | -3.549958000000 |
| C | -4.788048000000  | -5.422912000000 | 5.287833000000  |
| C | -5.785802000000  | -4.093019000000 | 3.579680000000  |
| O | -9.094615000000  | 2.554165000000  | -2.460336000000 |
| O | 8.890443000000   | -6.383382000000 | -4.742796000000 |
| N | 11.644253000000  | -2.106224000000 | 3.300546000000  |
| C | 10.945783000000  | -0.048336000000 | 2.223803000000  |
| C | -11.385383000000 | -3.184897000000 | -0.820931000000 |
| N | -12.120631000000 | -3.182133000000 | -3.142284000000 |
| H | 1.509581000000   | 6.178237000000  | -1.269217000000 |
| C | 3.067159000000   | 7.645852000000  | -1.044273000000 |
| H | 4.282474000000   | 6.413024000000  | -4.532811000000 |
| C | 4.660095000000   | 7.770888000000  | -2.898676000000 |
| C | -5.875592000000  | -5.208405000000 | 6.142276000000  |
| H | -3.965416000000  | -6.045478000000 | 5.620747000000  |
| C | -6.896004000000  | -3.838912000000 | 4.404209000000  |
| H | -5.770424000000  | -3.689718000000 | 2.576855000000  |
| C | -9.947834000000  | 2.301969000000  | -1.387225000000 |
| C | 9.572131000000   | -5.528241000000 | -3.864697000000 |
| C | 12.160920000000  | -0.001790000000 | 1.375494000000  |
| C | -12.684785000000 | -2.630666000000 | -0.349539000000 |

|   |                  |                 |                 |
|---|------------------|-----------------|-----------------|
| C | 2.504004000000   | 8.135630000000  | 0.265630000000  |
| C | 4.223513000000   | 8.217738000000  | -1.626774000000 |
| C | 5.851436000000   | 8.377247000000  | -3.592589000000 |
| C | -5.883148000000  | -5.892832000000 | 7.484511000000  |
| C | -6.927176000000  | -4.368046000000 | 5.712297000000  |
| C | -8.044377000000  | -3.017120000000 | 3.882867000000  |
| C | -10.027612000000 | 1.003936000000  | -0.889426000000 |
| C | -10.781452000000 | 3.298417000000  | -0.861521000000 |
| C | 10.492069000000  | -6.049251000000 | -3.032846000000 |
| C | 9.324622000000   | -4.199906000000 | -3.852903000000 |
| C | 12.046659000000  | -0.034196000000 | -0.020887000000 |
| C | 13.431044000000  | 0.039831000000  | 1.963850000000  |
| C | -13.442402000000 | -3.315468000000 | 0.615256000000  |
| C | -13.146608000000 | -1.471976000000 | -0.866587000000 |
| H | 1.443352000000   | 8.432147000000  | 0.142065000000  |
| H | 3.056328000000   | 9.024023000000  | 0.640005000000  |
| H | 2.581549000000   | 7.336836000000  | 1.031063000000  |
| O | 4.901329000000   | 9.262869000000  | -0.971552000000 |
| H | 5.542752000000   | 8.793666000000  | -4.574601000000 |
| H | 6.289258000000   | 9.207088000000  | -2.996405000000 |
| H | 6.631707000000   | 7.603635000000  | -3.751266000000 |
| H | -5.039576000000  | -5.518564000000 | 8.102358000000  |
| H | -6.836759000000  | -5.712793000000 | 8.025267000000  |
| H | -5.778340000000  | -6.989696000000 | 7.347040000000  |
| O | -8.007859000000  | -4.074814000000 | 6.563378000000  |
| H | -8.968696000000  | -3.636296000000 | 3.871033000000  |
| H | -8.213640000000  | -2.133187000000 | 4.525445000000  |
| H | -7.882136000000  | -2.667928000000 | 2.840102000000  |
| H | -9.404872000000  | 0.234526000000  | -1.326305000000 |
| C | -10.883638000000 | 0.708748000000  | 0.175725000000  |
| H | -10.748057000000 | 4.295046000000  | -1.279857000000 |
| C | -11.643728000000 | 3.000327000000  | 0.204958000000  |
| C | 11.153445000000  | -5.242772000000 | -2.085642000000 |
| H | 10.672383000000  | -7.115754000000 | -3.066920000000 |
| C | 9.975854000000   | -3.368137000000 | -2.926096000000 |
| H | 8.613920000000   | -3.778395000000 | -4.551646000000 |
| H | 11.065970000000  | -0.104209000000 | -0.476931000000 |
| C | 13.185000000000  | -0.002596000000 | -0.834862000000 |
| H | 13.519433000000  | 0.043899000000  | 3.044219000000  |
| C | 14.585711000000  | 0.081018000000  | 1.171723000000  |
| C | -14.643402000000 | -2.778993000000 | 1.097721000000  |
| H | -13.096306000000 | -4.270934000000 | 0.992101000000  |
| C | -14.351202000000 | -0.901029000000 | -0.429594000000 |
| H | -12.575180000000 | -0.960496000000 | -1.633729000000 |
| C | 5.861071000000   | 8.814999000000  | -0.006295000000 |
| C | -7.749314000000  | -2.983771000000 | 7.452548000000  |



|   |                  |                 |                 |
|---|------------------|-----------------|-----------------|
| C | -11.688739000000 | 1.711913000000  | 0.747622000000  |
| H | -10.922250000000 | -0.300935000000 | 0.534754000000  |
| H | -12.275283000000 | 3.768007000000  | 0.630901000000  |
| H | 11.855740000000  | -5.713327000000 | -1.415843000000 |
| C | 10.887758000000  | -3.914300000000 | -2.015317000000 |
| H | 9.761141000000   | -2.309057000000 | -2.887249000000 |
| C | 12.996930000000  | -0.098351000000 | -2.326560000000 |
| C | 14.465605000000  | 0.092758000000  | -0.239418000000 |
| C | 15.924423000000  | 0.104307000000  | 1.862434000000  |
| C | -15.408150000000 | -3.548032000000 | 2.142314000000  |
| C | -15.092128000000 | -1.537289000000 | 0.593592000000  |
| C | -14.808613000000 | 0.382769000000  | -1.070671000000 |
| H | 5.407261000000   | 8.126631000000  | 0.746483000000  |
| H | 6.265658000000   | 9.693213000000  | 0.541722000000  |
| H | 6.715509000000   | 8.308897000000  | -0.504644000000 |
| H | -6.887704000000  | -3.202746000000 | 8.121524000000  |
| H | -8.644757000000  | -2.813702000000 | 8.088296000000  |
| H | -7.544824000000  | -2.048430000000 | 6.887107000000  |
| O | -12.570284000000 | 1.481849000000  | 1.822977000000  |
| O | 11.477353000000  | -3.035448000000 | -1.080616000000 |
| H | 12.460403000000  | -1.040734000000 | -2.569691000000 |
| H | 13.971348000000  | -0.120718000000 | -2.858728000000 |
| H | 12.406764000000  | 0.768960000000  | -2.689942000000 |
| O | 15.616094000000  | 0.175446000000  | -1.044642000000 |
| H | 16.021932000000  | -0.782599000000 | 2.523492000000  |
| H | 16.759249000000  | 0.072781000000  | 1.129405000000  |
| H | 16.019893000000  | 1.028411000000  | 2.469952000000  |
| H | -14.789493000000 | -3.658477000000 | 3.058015000000  |
| H | -16.356061000000 | -3.033516000000 | 2.410827000000  |
| H | -15.667245000000 | -4.555043000000 | 1.752651000000  |
| O | -16.257475000000 | -0.939842000000 | 1.106535000000  |
| H | -15.815635000000 | 0.679611000000  | -0.707478000000 |
| H | -14.092812000000 | 1.197290000000  | -0.835814000000 |
| H | -14.872080000000 | 0.251845000000  | -2.171645000000 |
| C | -12.372806000000 | 0.299542000000  | 2.612061000000  |
| C | 12.232006000000  | -3.594894000000 | 0.003731000000  |
| C | 15.969464000000  | 1.520793000000  | -1.381826000000 |
| C | -15.995708000000 | -0.020057000000 | 2.171971000000  |
| H | -13.053594000000 | 0.327854000000  | 3.487567000000  |
| H | -11.331294000000 | 0.241526000000  | 2.999959000000  |
| H | -12.608186000000 | -0.623741000000 | 2.039046000000  |
| H | 12.560996000000  | -2.782987000000 | 0.685526000000  |
| H | 11.608589000000  | -4.292621000000 | 0.607766000000  |
| H | 13.149757000000  | -4.100840000000 | -0.367082000000 |
| H | 15.154801000000  | 2.019028000000  | -1.954127000000 |
| H | 16.880353000000  | 1.510808000000  | -2.018463000000 |

|   |                  |                 |                 |
|---|------------------|-----------------|-----------------|
| H | 16.193378000000  | 2.116482000000  | -0.468621000000 |
| H | -15.540115000000 | -0.541866000000 | 3.041962000000  |
| H | -16.953465000000 | 0.433295000000  | 2.506626000000  |
| H | -15.321590000000 | 0.805460000000  | 1.843100000000  |
| S | 11.066902000000  | -3.278958000000 | 4.505223000000  |
| S | -7.026793000000  | 4.156612000000  | 1.555463000000  |
| S | -1.458761000000  | 6.991617000000  | -4.562596000000 |
| S | -4.680789000000  | -6.574877000000 | -0.319304000000 |
| S | 6.027180000000   | -5.238120000000 | -8.164208000000 |
| S | -11.499270000000 | -3.538727000000 | -4.770816000000 |
| O | 7.702351000000   | -6.038157000000 | -1.333410000000 |
| O | 8.239795000000   | -8.000586000000 | -2.270894000000 |
| O | 4.850926000000   | -7.663190000000 | -1.473672000000 |
| O | 3.989101000000   | -5.654553000000 | -1.693256000000 |
| O | -8.146331000000  | -4.911277000000 | 1.412119000000  |
| O | -6.952595000000  | -3.409304000000 | 0.334706000000  |
| O | -10.965200000000 | -4.169817000000 | 2.226236000000  |
| O | -10.265277000000 | -2.055816000000 | 1.964735000000  |
| O | 0.547302000000   | -3.585484000000 | 3.489218000000  |
| O | 0.862102000000   | -5.787029000000 | 3.838891000000  |
| O | -1.490820000000  | -4.832427000000 | 5.840736000000  |
| O | -2.812751000000  | -3.124776000000 | 5.249131000000  |
| O | 5.526415000000   | 5.467763000000  | 3.664937000000  |
| O | 3.958455000000   | 6.773290000000  | 4.587181000000  |
| O | 0.889605000000   | 5.650168000000  | 5.554815000000  |
| O | 2.628288000000   | 4.317487000000  | 6.037400000000  |
| O | 9.277932000000   | 2.023817000000  | 0.167805000000  |
| O | 11.151357000000  | 2.706183000000  | 1.189157000000  |
| O | 3.804286000000   | 2.249183000000  | -2.742710000000 |
| O | 4.735248000000   | 3.984445000000  | -3.853601000000 |
| O | 7.879694000000   | 2.935242000000  | 2.778037000000  |
| O | 6.467312000000   | 1.209794000000  | 2.538151000000  |
| O | -6.438869000000  | 6.386014000000  | -5.306687000000 |
| O | -4.506259000000  | 5.348591000000  | -4.740911000000 |
| O | -7.144042000000  | 3.410241000000  | -5.775704000000 |
| O | -9.238069000000  | 3.684547000000  | -4.963267000000 |
| O | 3.047818000000   | 1.355868000000  | -5.480191000000 |
| O | 1.115877000000   | 0.575046000000  | -4.602134000000 |
| N | 4.754797000000   | -6.540993000000 | -2.122905000000 |
| N | 7.507702000000   | -6.926021000000 | -2.264228000000 |
| N | -10.525554000000 | -3.221904000000 | 1.453924000000  |
| N | -8.050178000000  | -4.093663000000 | 0.475409000000  |
| N | 7.681092000000   | 1.654068000000  | 2.687996000000  |
| N | 10.078839000000  | 1.969447000000  | 1.188361000000  |
| N | 1.920684000000   | 4.963042000000  | 5.157886000000  |
| N | 4.269728000000   | 5.739626000000  | 3.860922000000  |

|   |                 |                 |                 |
|---|-----------------|-----------------|-----------------|
| N | -8.008294000000 | 3.722861000000  | -4.752597000000 |
| N | -5.725612000000 | 5.504890000000  | -4.529725000000 |
| N | 1.855108000000  | 1.556455000000  | -4.825949000000 |
| N | 3.696035000000  | 3.409848000000  | -3.472068000000 |
| N | -2.104326000000 | -4.163245000000 | 4.909636000000  |
| N | 0.116563000000  | -4.810905000000 | 3.411093000000  |
| N | -1.922927000000 | 0.202329000000  | 0.717646000000  |
| N | 0.344541000000  | -0.584494000000 | -0.725548000000 |
| O | -2.206921000000 | -0.486225000000 | -0.310327000000 |
| O | -2.648179000000 | 1.149604000000  | 1.159280000000  |
| O | 0.111697000000  | 0.289046000000  | -1.530714000000 |
| O | 0.469071000000  | -1.766289000000 | -0.989784000000 |

CAB:

|   |                 |                 |                 |
|---|-----------------|-----------------|-----------------|
| S | 2.311442000000  | -0.881984000000 | 4.987243000000  |
| S | 0.453395000000  | 3.524795000000  | -0.490234000000 |
| O | -1.678008000000 | -0.978782000000 | 3.405352000000  |
| O | 4.144699000000  | 5.221274000000  | 1.731434000000  |
| O | -2.464177000000 | 9.226146000000  | -0.249389000000 |
| O | -0.426740000000 | -4.414256000000 | -4.322129000000 |
| N | 2.887714000000  | -0.589243000000 | 3.440427000000  |
| N | -0.073831000000 | 3.221285000000  | 1.182866000000  |
| O | 5.326922000000  | 2.593430000000  | 8.200457000000  |
| O | -3.810266000000 | -0.898776000000 | -4.077542000000 |
| N | 0.685210000000  | -0.902186000000 | 4.656649000000  |
| N | 2.004346000000  | 4.101775000000  | 0.158121000000  |
| C | 1.832068000000  | -0.516460000000 | 2.641430000000  |
| C | 0.876850000000  | 3.561895000000  | 2.072053000000  |
| C | 0.595409000000  | -0.687011000000 | 3.343459000000  |
| C | 2.027329000000  | 4.037587000000  | 1.499729000000  |
| C | 1.852265000000  | -0.371793000000 | 1.192630000000  |
| C | 0.723298000000  | 3.513888000000  | 3.473614000000  |
| C | 0.570187000000  | -0.264395000000 | 0.566839000000  |
| C | 1.767182000000  | 3.950884000000  | 4.263544000000  |
| C | -0.628165000000 | -0.633489000000 | 2.655896000000  |
| C | 3.077284000000  | 4.495808000000  | 2.294932000000  |
| C | -0.633200000000 | -0.250125000000 | 1.284583000000  |
| C | 2.926990000000  | 4.437668000000  | 3.697657000000  |
| C | 3.096327000000  | -0.407425000000 | 0.434734000000  |
| C | -0.574425000000 | 3.022566000000  | 4.046467000000  |
| C | 4.314677000000  | -0.855033000000 | 1.013488000000  |
| C | -1.743788000000 | 3.531115000000  | 3.601906000000  |
| H | 4.374101000000  | -0.991016000000 | 2.081223000000  |
| H | -1.736352000000 | 4.291978000000  | 2.837291000000  |
| C | -2.951747000000 | -1.196940000000 | 2.958629000000  |
| C | 4.940725000000  | 4.568028000000  | 0.773355000000  |
| C | 3.136278000000  | -0.098028000000 | -0.950088000000 |

|   |                 |                 |                 |
|---|-----------------|-----------------|-----------------|
| C | -0.591976000000 | 2.026029000000  | 5.039095000000  |
| H | 2.341463000000  | 0.462090000000  | -1.414341000000 |
| H | 0.338429000000  | 1.609062000000  | 5.396773000000  |
| C | -3.952644000000 | -0.784287000000 | 3.825742000000  |
| C | 5.208510000000  | 3.241374000000  | 0.823541000000  |
| H | -3.693874000000 | -0.502486000000 | 4.834027000000  |
| H | 4.781804000000  | 2.627190000000  | 1.604592000000  |
| C | -4.703417000000 | 2.129282000000  | -2.963964000000 |
| C | 4.180146000000  | -5.245075000000 | 0.387429000000  |
| C | -5.249703000000 | -0.662186000000 | 3.369401000000  |
| C | 6.093024000000  | 2.658630000000  | -0.108452000000 |
| H | -5.998492000000 | -0.259619000000 | 4.037843000000  |
| H | 6.301849000000  | 1.603774000000  | -0.021354000000 |
| C | 4.194899000000  | -0.461178000000 | -1.753701000000 |
| C | -1.797381000000 | 1.588855000000  | 5.604704000000  |
| C | 5.316239000000  | -1.051966000000 | -1.147311000000 |
| C | -3.012675000000 | 2.146480000000  | 5.148116000000  |
| C | 5.425509000000  | -1.167267000000 | 0.244785000000  |
| C | -2.981022000000 | 3.096186000000  | 4.101370000000  |
| C | -3.500418000000 | 2.335661000000  | -2.266628000000 |
| C | 3.272025000000  | -4.226961000000 | 0.069767000000  |
| H | -3.459518000000 | 2.266276000000  | -1.197609000000 |
| H | 3.638148000000  | -3.239760000000 | -0.138897000000 |
| C | -2.320189000000 | 2.621948000000  | -2.955773000000 |
| C | 1.899010000000  | -4.501933000000 | -0.006188000000 |
| H | -1.394226000000 | 2.701988000000  | -2.406865000000 |
| H | 1.197867000000  | -3.716607000000 | -0.244660000000 |
| C | -1.318825000000 | 9.479772000000  | -1.069423000000 |
| C | -0.567309000000 | -4.578804000000 | -2.903226000000 |
| H | -0.711374000000 | 10.290092000000 | -0.612942000000 |
| H | -1.635225000000 | -4.523732000000 | -2.610833000000 |
| H | -1.615178000000 | 9.805773000000  | -2.092139000000 |
| H | -0.192583000000 | -5.569910000000 | -2.561826000000 |
| H | -0.676185000000 | 8.578027000000  | -1.149935000000 |
| H | -0.017482000000 | -3.783895000000 | -2.355182000000 |
| C | 4.135607000000  | -0.275712000000 | -3.244702000000 |
| C | -1.747280000000 | 0.538267000000  | 6.683209000000  |
| H | -3.970596000000 | 10.732763000000 | -1.471780000000 |
| H | -0.435411000000 | -6.906841000000 | -4.615383000000 |
| H | 3.239248000000  | 0.275637000000  | -3.526614000000 |
| H | -1.354195000000 | -0.410789000000 | 6.259748000000  |
| H | 4.116083000000  | -1.247968000000 | -3.743025000000 |
| H | -1.088289000000 | 0.875250000000  | 7.509870000000  |
| C | 6.701613000000  | -1.658872000000 | 0.867924000000  |
| C | -4.237665000000 | 3.653412000000  | 3.483032000000  |
| H | 6.630652000000  | -1.624718000000 | 1.954983000000  |

|   |                 |                 |                 |
|---|-----------------|-----------------|-----------------|
| H | -4.232765000000 | 3.460904000000  | 2.389683000000  |
| H | 7.546127000000  | -1.034885000000 | 0.557862000000  |
| H | -5.144740000000 | 3.165700000000  | 3.899475000000  |
| H | 6.922569000000  | -2.685748000000 | 0.568084000000  |
| H | -4.302696000000 | 4.745887000000  | 3.664560000000  |
| C | 5.486115000000  | 3.996269000000  | 7.945730000000  |
| C | -2.420094000000 | -1.232883000000 | -3.972824000000 |
| H | 4.484971000000  | 4.456124000000  | 7.768529000000  |
| H | -1.816458000000 | -0.342056000000 | -4.250964000000 |
| H | 6.117354000000  | 4.216754000000  | 7.057679000000  |
| H | -2.150836000000 | -1.508505000000 | -2.927203000000 |
| H | 5.939399000000  | 4.484381000000  | 8.833422000000  |
| H | -2.146249000000 | -2.048076000000 | -4.677675000000 |
| C | -3.324886000000 | 8.238075000000  | -0.767383000000 |
| C | 0.902809000000  | -4.588806000000 | -4.755835000000 |
| C | 5.926825000000  | 1.737046000000  | 7.268923000000  |
| C | -4.772736000000 | -1.861023000000 | -3.705486000000 |
| C | -3.273376000000 | -1.733744000000 | 1.714318000000  |
| C | 5.531034000000  | 5.320027000000  | -0.170406000000 |
| C | -4.707644000000 | 2.275043000000  | -4.352952000000 |
| O | -5.913874000000 | 1.777059000000  | -2.334998000000 |
| O | 5.546266000000  | -4.896000000000 | 0.479494000000  |
| C | 3.698078000000  | -6.497726000000 | 0.583288000000  |
| C | -5.549239000000 | -0.993315000000 | 2.042844000000  |
| C | 6.688497000000  | 3.426168000000  | -1.060854000000 |
| O | 6.352178000000  | -1.465019000000 | -1.939707000000 |
| O | -4.238272000000 | 1.751482000000  | 5.720684000000  |
| C | -2.326699000000 | 2.762663000000  | -4.352588000000 |
| C | 1.450665000000  | -5.748493000000 | 0.220658000000  |
| H | 4.999354000000  | 0.260048000000  | -3.644879000000 |
| H | -2.754912000000 | 0.330865000000  | 7.097777000000  |
| C | -3.143019000000 | 6.877721000000  | -0.417943000000 |
| C | -4.437920000000 | 8.611260000000  | -1.560081000000 |
| C | 1.457150000000  | -5.881461000000 | -4.915458000000 |
| C | 1.711618000000  | -3.459753000000 | -5.012691000000 |
| C | 5.150537000000  | 0.873629000000  | 6.588409000000  |
| C | 7.266672000000  | 1.717498000000  | 7.092058000000  |
| C | -4.505052000000 | -3.179785000000 | -3.551367000000 |
| C | -6.088200000000 | -1.422654000000 | -3.515070000000 |
| H | -2.513772000000 | -2.183761000000 | 1.086919000000  |
| C | -4.569805000000 | -1.599688000000 | 1.246926000000  |
| C | 6.411907000000  | 4.742683000000  | -1.099685000000 |
| H | 5.322884000000  | 6.375848000000  | -0.212953000000 |
| C | -3.525108000000 | 2.578694000000  | -5.045395000000 |
| H | -5.634818000000 | 2.129827000000  | -4.890116000000 |
| C | -5.840875000000 | 1.195755000000  | -1.026745000000 |

|   |                 |                 |                 |
|---|-----------------|-----------------|-----------------|
| C | 6.504435000000  | -5.929793000000 | 0.734964000000  |
| H | 4.349715000000  | -7.323308000000 | 0.823233000000  |
| C | 2.316214000000  | -6.747155000000 | 0.475862000000  |
| O | -6.753782000000 | -0.760150000000 | 1.472352000000  |
| O | 7.590287000000  | 2.927622000000  | -2.029196000000 |
| C | 6.220237000000  | -2.824694000000 | -2.367960000000 |
| C | -4.663900000000 | 2.613084000000  | 6.780238000000  |
| O | -1.146993000000 | 3.001839000000  | -5.078004000000 |
| O | 0.097818000000  | -6.049786000000 | 0.067293000000  |
| C | -2.038407000000 | 6.424965000000  | 0.498815000000  |
| C | -4.051499000000 | 5.915337000000  | -0.878775000000 |
| C | -5.342435000000 | 7.631332000000  | -1.992882000000 |
| C | -4.710195000000 | 10.045033000000 | -1.934407000000 |
| C | 0.640736000000  | -7.138986000000 | -4.766360000000 |
| C | 2.822537000000  | -6.002443000000 | -5.204391000000 |
| C | 3.075524000000  | -3.634560000000 | -5.303784000000 |
| C | 1.140010000000  | -2.070869000000 | -4.924656000000 |
| C | 5.692741000000  | -0.002584000000 | 5.708373000000  |
| H | 4.081201000000  | 0.909848000000  | 6.754773000000  |
| C | 7.831321000000  | 0.806230000000  | 6.177695000000  |
| H | 7.899155000000  | 2.386656000000  | 7.660407000000  |
| H | -3.517652000000 | -3.577278000000 | -3.721465000000 |
| C | -5.529374000000 | -4.073416000000 | -3.184525000000 |
| H | -6.325088000000 | -0.376872000000 | -3.661793000000 |
| C | -7.087624000000 | -2.334587000000 | -3.136838000000 |
| H | -4.824561000000 | -1.936750000000 | 0.251939000000  |
| H | 6.867609000000  | 5.357527000000  | -1.863689000000 |
| H | -3.529604000000 | 2.683971000000  | -6.120926000000 |
| H | -5.146016000000 | 0.328010000000  | -1.020516000000 |
| H | -6.845891000000 | 0.827211000000  | -0.721839000000 |
| H | -5.539456000000 | 1.951264000000  | -0.271598000000 |
| H | 7.525399000000  | -5.492667000000 | 0.734565000000  |
| H | 6.335913000000  | -6.390022000000 | 1.733736000000  |
| H | 6.473967000000  | -6.704765000000 | -0.063379000000 |
| H | 1.927700000000  | -7.743890000000 | 0.629518000000  |
| C | -7.661016000000 | 0.054152000000  | 2.196804000000  |
| C | 7.793079000000  | 1.513805000000  | -2.121204000000 |
| H | 6.146661000000  | -3.496471000000 | -1.511537000000 |
| H | 7.114500000000  | -3.051536000000 | -2.946829000000 |
| H | 5.334252000000  | -2.958256000000 | -2.995282000000 |
| H | -3.920106000000 | 2.621085000000  | 7.608276000000  |
| H | -5.630119000000 | 2.245509000000  | 7.186435000000  |
| H | -4.816291000000 | 3.653401000000  | 6.414908000000  |
| C | -0.248243000000 | 3.898543000000  | -4.470846000000 |
| C | -0.872805000000 | -5.672153000000 | 1.032974000000  |
| H | -2.483725000000 | 5.945534000000  | 1.392736000000  |

|   |                 |                 |                 |
|---|-----------------|-----------------|-----------------|
| H | -1.421199000000 | 7.277748000000  | 0.849658000000  |
| H | -1.385704000000 | 5.696607000000  | -0.024619000000 |
| H | -3.919591000000 | 4.878662000000  | -0.593520000000 |
| C | -5.165139000000 | 6.284030000000  | -1.645613000000 |
| H | -6.211393000000 | 7.928023000000  | -2.569453000000 |
| H | -5.718553000000 | 10.344026000000 | -1.579485000000 |
| H | -4.656469000000 | 10.159096000000 | -3.037736000000 |
| H | 1.001999000000  | -7.720897000000 | -3.891964000000 |
| H | 0.723612000000  | -7.758161000000 | -5.683910000000 |
| H | 3.266639000000  | -6.989556000000 | -5.267322000000 |
| C | 3.634569000000  | -4.861451000000 | -5.345597000000 |
| H | 3.699458000000  | -2.765508000000 | -5.456999000000 |
| H | 0.270449000000  | -1.988304000000 | -5.608667000000 |
| H | 0.800303000000  | -1.880990000000 | -3.885819000000 |
| H | 1.874191000000  | -1.288229000000 | -5.202945000000 |
| H | 5.066890000000  | -0.686958000000 | 5.153668000000  |
| C | 7.021011000000  | -0.033690000000 | 5.483860000000  |
| H | 8.902860000000  | 0.778292000000  | 6.041862000000  |
| C | -6.787496000000 | -3.648465000000 | -2.966926000000 |
| H | -5.314220000000 | -5.126692000000 | -3.060278000000 |
| H | -8.095137000000 | -1.971253000000 | -2.999782000000 |
| H | -8.012890000000 | -0.445505000000 | 3.104654000000  |
| H | -8.507370000000 | 0.228343000000  | 1.539651000000  |
| H | -7.202136000000 | 1.008824000000  | 2.468130000000  |
| H | 8.504585000000  | 1.300149000000  | -2.944464000000 |
| H | 8.228988000000  | 1.101644000000  | -1.186168000000 |
| H | 6.840211000000  | 1.003237000000  | -2.352419000000 |
| C | -0.665833000000 | 5.275572000000  | -4.144330000000 |
| C | 1.101974000000  | 3.560479000000  | -4.296661000000 |
| C | -0.638779000000 | -5.196814000000 | 2.368976000000  |
| C | -2.199835000000 | -5.872398000000 | 0.652743000000  |
| C | -6.227791000000 | 5.285288000000  | -1.944993000000 |
| C | 5.119736000000  | -5.001987000000 | -5.455032000000 |
| O | 7.503646000000  | -0.973761000000 | 4.552451000000  |
| O | -7.738940000000 | -4.621112000000 | -2.600457000000 |
| N | -1.886201000000 | 5.767615000000  | -4.418592000000 |
| C | 0.177773000000  | 6.140248000000  | -3.609651000000 |
| C | 2.029449000000  | 4.534259000000  | -3.618276000000 |
| C | -1.696900000000 | -4.968901000000 | 3.229738000000  |
| C | -3.229649000000 | -5.674032000000 | 1.531137000000  |
| N | -2.578163000000 | -6.309685000000 | -0.562581000000 |
| C | -6.866306000000 | 4.582383000000  | -0.806349000000 |
| C | -6.700798000000 | 5.066640000000  | -3.201395000000 |
| C | 5.850104000000  | -5.694778000000 | -4.516559000000 |
| C | 5.799813000000  | -4.385756000000 | -6.520872000000 |
| C | 8.689663000000  | -0.677071000000 | 3.846687000000  |

|   |                  |                 |                 |
|---|------------------|-----------------|-----------------|
| C | -8.905101000000  | -4.176447000000 | -1.957863000000 |
| N | -0.323714000000  | 7.373350000000  | -3.417752000000 |
| C | 1.569545000000   | 5.770098000000  | -3.271187000000 |
| C | -2.990287000000  | -5.239431000000 | 2.843419000000  |
| N | -4.443457000000  | -5.969866000000 | 1.033134000000  |
| N | -6.453137000000  | 4.725471000000  | 0.468210000000  |
| C | -7.898805000000  | 3.767096000000  | -0.967930000000 |
| C | -7.867299000000  | 4.145618000000  | -3.415546000000 |
| C | 7.219140000000   | -5.794113000000 | -4.615541000000 |
| C | 7.166727000000   | -4.448191000000 | -6.619290000000 |
| N | 5.209517000000   | -3.658128000000 | -7.485344000000 |
| C | 9.699845000000   | -1.566479000000 | 3.889238000000  |
| C | 8.826060000000   | 0.451983000000  | 3.086579000000  |
| C | -8.947613000000  | -3.992128000000 | -0.556369000000 |
| C | -10.082715000000 | -4.016403000000 | -2.684341000000 |
| C | 2.343202000000   | 6.721021000000  | -2.436249000000 |
| C | -4.133392000000  | -5.179417000000 | 3.802762000000  |
| N | -8.346506000000  | 3.205672000000  | 0.173476000000  |
| C | -8.468020000000  | 3.499874000000  | -2.323425000000 |
| C | 7.915201000000   | -5.122024000000 | -5.654839000000 |
| N | 7.688661000000   | -3.758994000000 | -7.647985000000 |
| N | 9.655773000000   | -2.725831000000 | 4.569367000000  |
| C | 10.886504000000  | -1.342855000000 | 3.229528000000  |
| C | 10.060159000000  | 0.724522000000  | 2.407981000000  |
| C | -10.120033000000 | -3.619168000000 | 0.063173000000  |
| C | -11.241116000000 | -3.649066000000 | -2.053028000000 |
| N | -10.188847000000 | -4.173014000000 | -4.014667000000 |
| C | 1.923578000000   | 6.980686000000  | -1.126247000000 |
| C | 3.408998000000   | 7.450367000000  | -2.975060000000 |
| C | -4.068930000000  | -5.907279000000 | 5.005478000000  |
| C | -5.235293000000  | -4.454400000000 | 3.517016000000  |
| O | -9.449860000000  | 2.517085000000  | -2.589661000000 |
| O | 9.322875000000   | -5.065798000000 | -5.699914000000 |
| N | 11.794099000000  | -2.325554000000 | 3.365261000000  |
| C | 11.083704000000  | -0.178853000000 | 2.475308000000  |
| C | -11.275703000000 | -3.439937000000 | -0.661104000000 |
| N | -12.297345000000 | -3.514322000000 | -2.874880000000 |
| H | 1.078326000000   | 6.440237000000  | -0.721578000000 |
| C | 2.571110000000   | 7.937499000000  | -0.336963000000 |
| H | 3.720639000000   | 7.261783000000  | -3.996314000000 |
| C | 4.082585000000   | 8.409048000000  | -2.204599000000 |
| C | -5.100142000000  | -5.830229000000 | 5.948137000000  |
| H | -3.204232000000  | -6.528150000000 | 5.213139000000  |
| C | -6.294054000000  | -4.340495000000 | 4.433752000000  |
| H | -5.313297000000  | -3.950490000000 | 2.561845000000  |
| C | -10.258489000000 | 2.124783000000  | -1.525798000000 |



|   |                  |                 |                 |
|---|------------------|-----------------|-----------------|
| C | 9.917697000000   | -4.426386000000 | -4.602101000000 |
| C | 12.355483000000  | -0.001740000000 | 1.729481000000  |
| C | -12.557524000000 | -3.012638000000 | -0.027653000000 |
| C | 2.051750000000   | 8.178966000000  | 1.057287000000  |
| C | 3.675339000000   | 8.647787000000  | -0.868244000000 |
| C | 5.222634000000   | 9.158918000000  | -2.840873000000 |
| C | -4.983821000000  | -6.646324000000 | 7.208510000000  |
| C | -6.212174000000  | -5.000420000000 | 5.680337000000  |
| C | -7.504202000000  | -3.523182000000 | 4.073122000000  |
| C | -10.114338000000 | 0.844389000000  | -0.994351000000 |
| C | -11.224936000000 | 2.990426000000  | -1.003791000000 |
| C | 10.847445000000  | -5.086798000000 | -3.887231000000 |
| C | 9.571030000000   | -3.166596000000 | -4.259510000000 |
| C | 12.347103000000  | 0.086382000000  | 0.330868000000  |
| C | 13.575832000000  | 0.027819000000  | 2.415857000000  |
| C | -13.114319000000 | -3.763609000000 | 1.022062000000  |
| C | -13.205677000000 | -1.920591000000 | -0.487298000000 |
| H | 0.969018000000   | 8.418677000000  | 1.030592000000  |
| H | 2.573477000000   | 9.031605000000  | 1.542087000000  |
| H | 2.220792000000   | 7.274558000000  | 1.679797000000  |
| O | 4.333567000000   | 9.619421000000  | -0.091447000000 |
| H | 4.862041000000   | 9.697036000000  | -3.742289000000 |
| H | 5.651177000000   | 9.911929000000  | -2.145277000000 |
| H | 6.024392000000   | 8.448025000000  | -3.131558000000 |
| H | -4.105304000000  | -6.308308000000 | 7.796870000000  |
| H | -5.894816000000  | -6.550375000000 | 7.837039000000  |
| H | -4.866253000000  | -7.719904000000 | 6.951318000000  |
| O | -7.246475000000  | -4.861472000000 | 6.624367000000  |
| H | -8.409902000000  | -4.163883000000 | 4.146876000000  |
| H | -7.608126000000  | -2.668009000000 | 4.768411000000  |
| H | -7.453859000000  | -3.135256000000 | 3.032126000000  |
| H | -9.377124000000  | 0.177018000000  | -1.419776000000 |
| C | -10.883269000000 | 0.449845000000  | 0.105503000000  |
| H | -11.349044000000 | 3.969734000000  | -1.445487000000 |
| C | -12.008466000000 | 2.589164000000  | 0.087712000000  |
| C | 11.410494000000  | -4.517480000000 | -2.727625000000 |
| H | 11.114137000000  | -6.093139000000 | -4.186711000000 |
| C | 10.120828000000  | -2.569028000000 | -3.113079000000 |
| H | 8.860598000000   | -2.621646000000 | -4.866793000000 |
| H | 11.407372000000  | 0.016808000000  | -0.205751000000 |
| C | 13.541456000000  | 0.229801000000  | -0.385496000000 |
| H | 13.583386000000  | -0.065216000000 | 3.495376000000  |
| C | 14.784786000000  | 0.172943000000  | 1.723130000000  |
| C | -14.304462000000 | -3.360043000000 | 1.639882000000  |
| H | -12.616582000000 | -4.665723000000 | 1.363190000000  |
| C | -14.412497000000 | -1.486977000000 | 0.082984000000  |

|   |                  |                 |                 |
|---|------------------|-----------------|-----------------|
| H | -12.790289000000 | -1.359156000000 | -1.316548000000 |
| C | 5.367548000000   | 9.083029000000  | 0.740692000000  |
| C | -6.997780000000  | -3.832959000000 | 7.587158000000  |
| C | -11.828199000000 | 1.330311000000  | 0.669900000000  |
| H | -10.737824000000 | -0.537680000000 | 0.502546000000  |
| H | -12.745888000000 | 3.258684000000  | 0.509094000000  |
| H | 12.122292000000  | -5.103550000000 | -2.166322000000 |
| C | 11.038366000000  | -3.275726000000 | -2.326812000000 |
| H | 9.825477000000   | -1.573303000000 | -2.810969000000 |
| C | 13.468536000000  | 0.276039000000  | -1.889141000000 |
| C | 14.770445000000  | 0.306687000000  | 0.313076000000  |
| C | 16.066091000000  | 0.168821000000  | 2.516347000000  |
| C | -14.844879000000 | -4.195208000000 | 2.769204000000  |
| C | -14.952655000000 | -2.188958000000 | 1.185539000000  |
| C | -15.090586000000 | -0.276450000000 | -0.504495000000 |
| H | 4.972271000000   | 8.303442000000  | 1.432668000000  |
| H | 5.798387000000   | 9.899173000000  | 1.359670000000  |
| H | 6.187487000000   | 8.652246000000  | 0.125559000000  |
| H | -6.076845000000  | -4.045904000000 | 8.173681000000  |
| H | -7.853943000000  | -3.782216000000 | 8.293348000000  |
| H | -6.897906000000  | -2.840849000000 | 7.094577000000  |
| O | -12.639223000000 | 0.997977000000  | 1.773341000000  |
| O | 11.516048000000  | -2.639965000000 | -1.160598000000 |
| H | 12.970599000000  | -0.642793000000 | -2.265143000000 |
| H | 14.482010000000  | 0.319808000000  | -2.342205000000 |
| H | 12.892354000000  | 1.167983000000  | -2.211344000000 |
| O | 15.974001000000  | 0.485154000000  | -0.392806000000 |
| H | 16.149210000000  | -0.776729000000 | 3.092712000000  |
| H | 16.954338000000  | 0.236253000000  | 1.852012000000  |
| H | 16.081471000000  | 1.031060000000  | 3.215217000000  |
| H | -14.109736000000 | -4.227088000000 | 3.600965000000  |
| H | -15.801635000000 | -3.783243000000 | 3.155989000000  |
| H | -15.040905000000 | -5.228216000000 | 2.412596000000  |
| O | -16.122019000000 | -1.731020000000 | 1.818354000000  |
| H | -16.081675000000 | -0.102028000000 | -0.033679000000 |
| H | -14.461768000000 | 0.622555000000  | -0.339533000000 |
| H | -15.253733000000 | -0.424232000000 | -1.592780000000 |
| C | -12.179557000000 | -0.043361000000 | 2.645911000000  |
| C | 12.303086000000  | -3.403233000000 | -0.236567000000 |
| C | 16.324079000000  | 1.861411000000  | -0.567194000000 |
| C | -15.863631000000 | -0.772922000000 | 2.849363000000  |
| H | -12.842063000000 | -0.093706000000 | 3.534180000000  |
| H | -11.147922000000 | 0.164406000000  | 3.005385000000  |
| H | -12.210042000000 | -1.040986000000 | 2.155828000000  |
| H | 12.536279000000  | -2.780209000000 | 0.652810000000  |
| H | 11.742126000000  | -4.294256000000 | 0.125805000000  |

|   |                  |                 |                 |
|---|------------------|-----------------|-----------------|
| H | 13.271424000000  | -3.703681000000 | -0.692685000000 |
| H | 15.543264000000  | 2.403009000000  | -1.146795000000 |
| H | 17.279590000000  | 1.926697000000  | -1.130993000000 |
| H | 16.467906000000  | 2.364102000000  | 0.415107000000  |
| H | -15.256191000000 | -1.224219000000 | 3.664304000000  |
| H | -16.828781000000 | -0.436713000000 | 3.285598000000  |
| H | -15.336112000000 | 0.123228000000  | 2.447596000000  |
| S | 11.174703000000  | -3.643253000000 | 4.391691000000  |
| S | -7.420728000000  | 3.746737000000  | 1.588110000000  |
| S | -2.011868000000  | 7.479452000000  | -3.960353000000 |
| S | -4.343951000000  | -6.508782000000 | -0.661369000000 |
| S | 6.409991000000   | -2.977684000000 | -8.613760000000 |
| S | -11.852761000000 | -3.852543000000 | -4.567762000000 |
| C | 0.384937000000   | -0.411959000000 | -0.923414000000 |
| C | -1.838765000000  | 0.296207000000  | 0.635103000000  |
| C | 8.016048000000   | -6.588383000000 | -3.643863000000 |
| C | 5.157533000000   | -6.292795000000 | -3.351043000000 |
| C | -7.685582000000  | -4.189439000000 | 0.206189000000  |
| C | -10.114398000000 | -3.358970000000 | 1.520244000000  |
| C | 0.733446000000   | -4.954124000000 | 2.844178000000  |
| C | -1.436211000000  | -4.445813000000 | 4.607754000000  |
| C | 4.047735000000   | 4.966893000000  | 4.512835000000  |
| C | 1.649730000000   | 3.914532000000  | 5.741390000000  |
| C | 10.210751000000  | 1.969889000000  | 1.617438000000  |
| C | 7.695462000000   | 1.395193000000  | 2.980201000000  |
| C | -6.099245000000  | 5.740249000000  | -4.369198000000 |
| C | -8.373137000000  | 3.867072000000  | -4.774000000000 |
| C | 3.379750000000   | 4.074375000000  | -3.224763000000 |
| C | 1.601608000000   | 2.290672000000  | -4.858048000000 |
| O | 8.067921000000   | -6.272417000000 | -2.364712000000 |
| O | 8.838371000000   | -7.505949000000 | -4.089248000000 |
| O | 5.264648000000   | -7.572668000000 | -3.100855000000 |
| O | 4.426553000000   | -5.573742000000 | -2.624563000000 |
| O | 0.228983000000   | 0.714155000000  | -1.613315000000 |
| O | 0.379284000000   | -1.505984000000 | -1.438807000000 |
| O | -2.506124000000  | 1.119381000000  | 1.473782000000  |
| O | -2.210853000000  | 0.097461000000  | -0.503023000000 |
| O | -7.583673000000  | -5.015795000000 | 1.154444000000  |
| O | -6.637048000000  | -3.464408000000 | -0.092506000000 |
| O | -10.365971000000 | -4.332001000000 | 2.361312000000  |
| O | -9.800634000000  | -2.172454000000 | 1.976584000000  |
| O | 1.201910000000   | -3.728877000000 | 2.901696000000  |
| O | 1.499058000000   | -5.961222000000 | 3.194249000000  |
| O | -0.533572000000  | -5.020397000000 | 5.366117000000  |
| O | -2.209591000000  | -3.521966000000 | 5.132838000000  |
| O | 5.286042000000   | 4.637051000000  | 4.231054000000  |

|   |                 |                 |                 |
|---|-----------------|-----------------|-----------------|
| O | 3.824736000000  | 5.791538000000  | 5.510666000000  |
| O | 0.621516000000  | 4.470623000000  | 6.339401000000  |
| O | 2.510216000000  | 3.213033000000  | 6.443915000000  |
| O | 9.329649000000  | 2.257302000000  | 0.691117000000  |
| O | 11.280750000000 | 2.719754000000  | 1.750218000000  |
| O | 3.554505000000  | 2.791395000000  | -2.735069000000 |
| O | 4.388599000000  | 4.805031000000  | -3.399878000000 |
| O | 7.862226000000  | 2.646301000000  | 3.335985000000  |
| O | 6.493441000000  | 0.965280000000  | 2.664968000000  |
| O | -6.868475000000 | 6.607228000000  | -5.129901000000 |
| O | -4.863473000000 | 5.658905000000  | -4.583280000000 |
| O | -7.484908000000 | 3.646623000000  | -5.820145000000 |
| O | -9.608139000000 | 3.909250000000  | -5.017054000000 |
| H | 4.742370000000  | -7.809373000000 | -2.265920000000 |
| H | 7.424298000000  | -5.538414000000 | -2.113756000000 |
| H | 0.133309000000  | 0.468097000000  | -2.551424000000 |
| H | -3.384979000000 | 1.258393000000  | 1.083761000000  |
| H | -8.433955000000 | -5.538941000000 | 1.312434000000  |
| H | -0.496114000000 | -4.570773000000 | 6.271855000000  |
| H | 2.143174000000  | -3.748153000000 | 3.275789000000  |
| H | 0.680104000000  | 4.331212000000  | 7.339967000000  |
| H | 5.917417000000  | 5.141271000000  | 4.836464000000  |
| H | -6.309827000000 | 6.958643000000  | -5.897298000000 |
| H | -8.007124000000 | 3.544167000000  | -6.681165000000 |
| H | 9.576624000000  | 3.124728000000  | 0.228770000000  |
| H | 6.992760000000  | 3.154283000000  | 3.227446000000  |
| O | 2.755588000000  | 2.287935000000  | -5.629809000000 |
| O | 0.945594000000  | 1.219641000000  | -4.735871000000 |
| H | 4.540944000000  | 2.622344000000  | -2.595926000000 |
| H | 2.923792000000  | 1.361497000000  | -5.994436000000 |
| H | -9.750000000000 | -2.180602000000 | 2.987154000000  |
